# Supplementary material for: Cytosine base editors with minimized unguided DNA and RNA off-target events and high on-target activity
Source: PubMed Central journal article supplement (PMC7189382; doi:10.1038/s41467-020-15887-5), 2020-04-28
Supplement: 41467_2020_15887_MOESM1_ESM.pdf [file 41467_2020_15887_MOESM1_ESM.pdf]

## **Supplementary Information**

### **Cytosine base editors with minimized unguided DNA and RNA off-target events and high on-target activity**

Authors:

Yi Yu, Thomas C. Leete, David A. Born, Lauren Young, Luis A Barrera, Seung-Joo Lee,  
Holly A. Rees, Giuseppe Ciaramella\*, Nicole M. Gaudelli\*

\*correspondence: [ngaudelli@beamtx.com](mailto:ngaudelli@beamtx.com), [gciaramella@beamtx.com](mailto:gciaramella@beamtx.com)

Affiliations: Beam Therapeutics (Cambridge, MA, USA)

## Table of Contents

|                                                                                                                                                                        |    |
|------------------------------------------------------------------------------------------------------------------------------------------------------------------------|----|
| <b>Supplementary Figure 1:</b> rAPOBEC1 homology model generated by SWISSMODEL using hAPOBEC3C structure.....                                                          | 4  |
| <b>Supplementary Figure 2:</b> <i>in cis/in trans</i> editing activities of BE4 with rAPOBEC1 mutants shown in Supplementary Figure 1 at site 1, 4, 6.....             | 5  |
| <b>Supplementary Figure 3:</b> <i>in cis/in trans</i> editing activities of BE4-rAPOBEC1 with HiFi mutations at site 1 to 10.....                                      | 6  |
| <b>Supplementary Figure 4:</b> <i>in cis/in trans</i> editing activities of CBEs tested in 1 <sup>st</sup> round screening at site 1, 4, 6.....                        | 7  |
| <b>Supplementary Figure 5:</b> Sequence alignment of CBEs tested in the 1st round screening.....                                                                       | 9  |
| <b>Supplementary Figure 6:</b> <i>in cis/in trans</i> activities of BE4-PpAPOBEC1 and BE4-PpAPOBEC with HiFi mutations at site 1 to 10.....                            | 10 |
| <b>Supplementary Figure 7:</b> <i>in cis/in trans</i> editing activities of CBEs tested in 2 <sup>st</sup> round screening at site 1, 4, 6.....                        | 11 |
| <b>Supplementary Figure 8:</b> <i>in cis/in trans</i> editing activities of next generation CBEs at site 1 to 10.....                                                  | 13 |
| <b>Supplementary Figure 9:</b> Editing window of CBEs shown in Supplementary Figure 8 at site 1 to 10.....                                                             | 14 |
| <b>Supplementary Figure 10:</b> Indel rates of CBEs shown in Supplementary Figure 8 at site 1 to 10.....                                                               | 16 |
| <b>Supplementary Figure 11:</b> Percentage of max C-to-T editing efficiency of CBEs tested in 3 <sup>st</sup> round screening at site 1, or 24 (*)......               | 17 |
| <b>Supplementary Figure 12:</b> Homology models of next generation CBEs based on existing crystal structures.....                                                      | 18 |
| <b>Supplementary Figure 13:</b> Guided off-target editing of selected next generation CBEs.....                                                                        | 19 |
| <b>Supplementary Figure 14:</b> Quantification of mRNA and protein concentration of base editors in HEK293T cells transfected with plasmids encoding base editors..... | 20 |

## Table of Contents Continued

|                                                                                                                                                         |    |
|---------------------------------------------------------------------------------------------------------------------------------------------------------|----|
| <b>Supplementary Figure 15:</b> Whole genome sequencing experiments to evaluate guide-independent cytidine deamination activity from base editors ..... | 21 |
| <b>Supplementary Figure 16:</b> C to U editing efficiency of selected CBEs on ssDNA substrates in <i>in vitro</i> enzymatic assay.....                  | 22 |
| <b>Supplementary Table 1:</b> Amino acid sequences of all deaminases tested in this study.....                                                          | 23 |
| <b>Supplementary Table 2:</b> DNA sequences of sgRNA used in this study.....                                                                            | 33 |
| <b>Supplementary Table 3:</b> DNA sequences of oligos used in this study .....                                                                          | 34 |
| <b>Supplementary Table 4:</b> DNA sequences of mammalian expression plasmids for the core CBEs showed in this study.....                                | 37 |
| <b>Supplementary Note 1:</b> Methods of creating similarity network of cytidine deaminases.....                                                         | 40 |
| <b>Supplementary Note 2:</b> Discussion about protein expression level of base editors. ....                                                            | 41 |
| <b>Supplementary Note 3:</b> Targeted NGS analysis details.....                                                                                         | 42 |
| <b>Supplementary Note 4:</b> Transcriptome sequencing analysis methods .....                                                                            | 44 |
| <b>Supplementary Note 5:</b> Whole genome NGS analysis details.....                                                                                     | 45 |
| <b>References:</b> .....                                                                                                                                | 46 |

**Supplementary Figure 1.** rAPOBEC1 homology model generated by SWISSMODEL using hAPOBEC3C structure (PDB ID 3VM8). ssDNA from hAPOBEC3A structure (PDB ID 5SWW) is manually docked. **a**, mutations predicted to affect ssDNA binding. **b**, mutations predicted to affect catalytic activity.

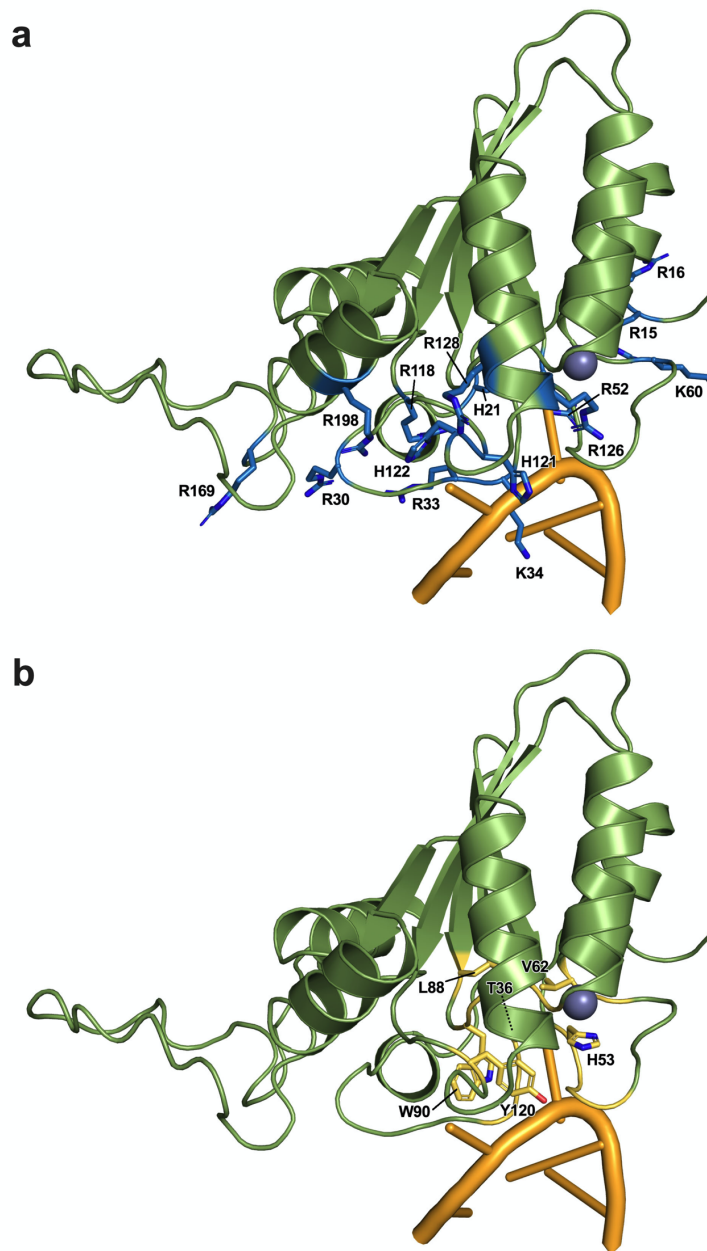

**Supplementary Figure 2.** *In cis* and *in trans* editing activities of BE4 with rAPOBEC1 mutants shown in Supplementary Figure 1 at site 1, 4, and 6. Base editing efficiencies were reported for the most edited base in the target sites. Values reflect the mean of n=3 independent biological replicates. All data presented are provided as source data.

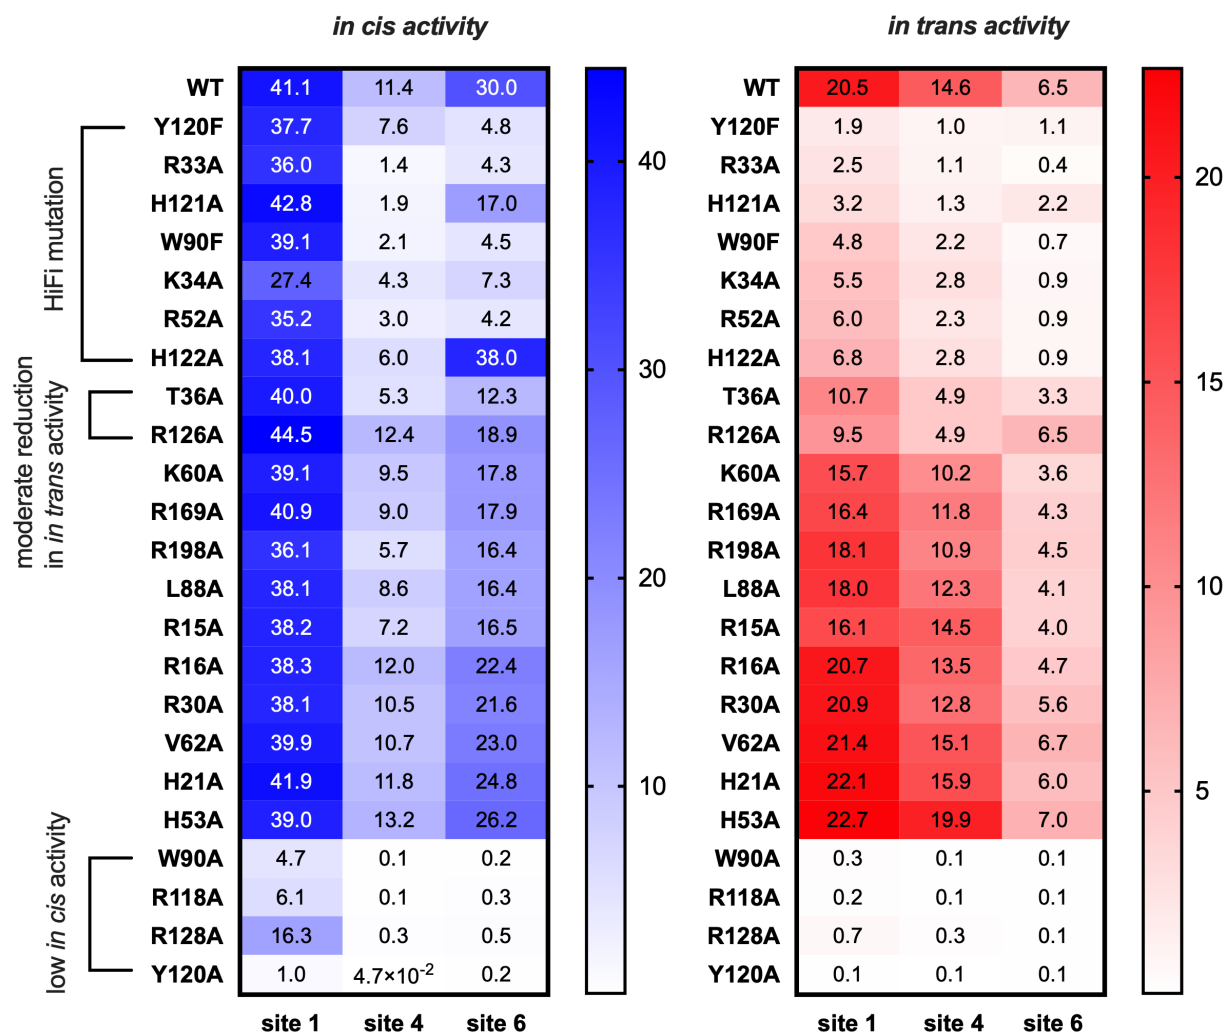

**Supplementary Figure 3.** *In cis/in trans* editing activities of BE4-rAPOBEC1 with HiFi mutations at site 1 to 10. Base editing efficiencies were reported for the most edited base in the target sites. Values and error bars reflect the mean and s.d. of n=4 independent biological replicates. All data presented are provided as source data.

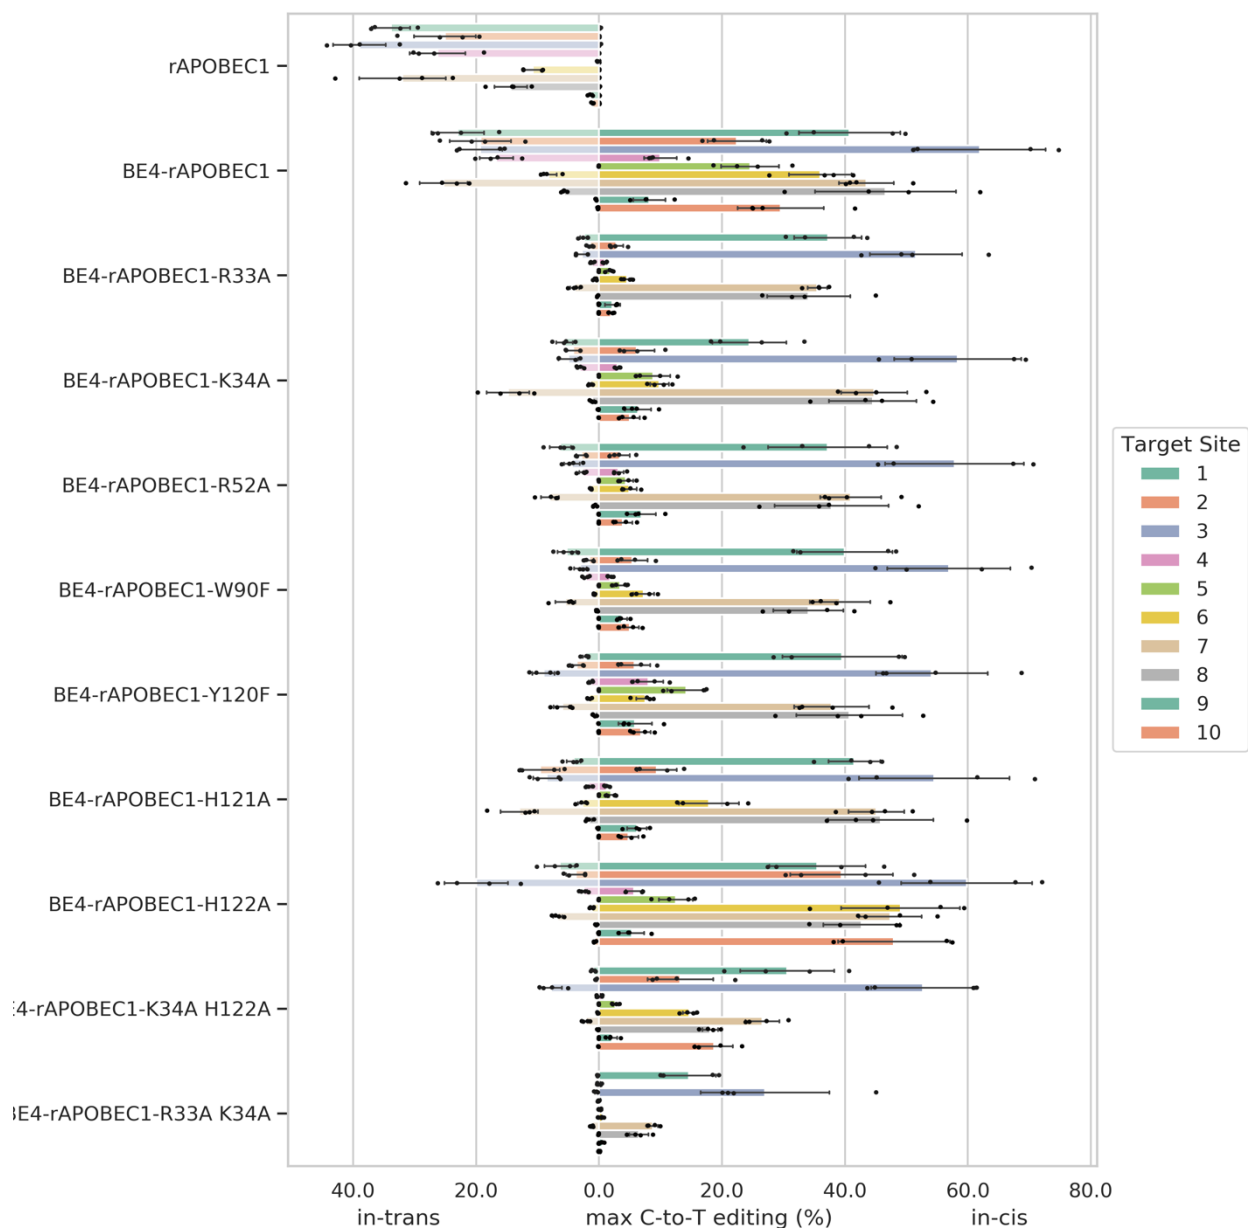

**Supplementary Figure 4.** *In cis/in trans* editing activities of CBEs tested in 1<sup>st</sup> round screening at site 1, 4, and 6. Base editing efficiencies were reported for the most edited base in the target sites. Values and error bars reflect the mean and s.d. of n=3 independent biological replicates. All data presented are provided as source data.

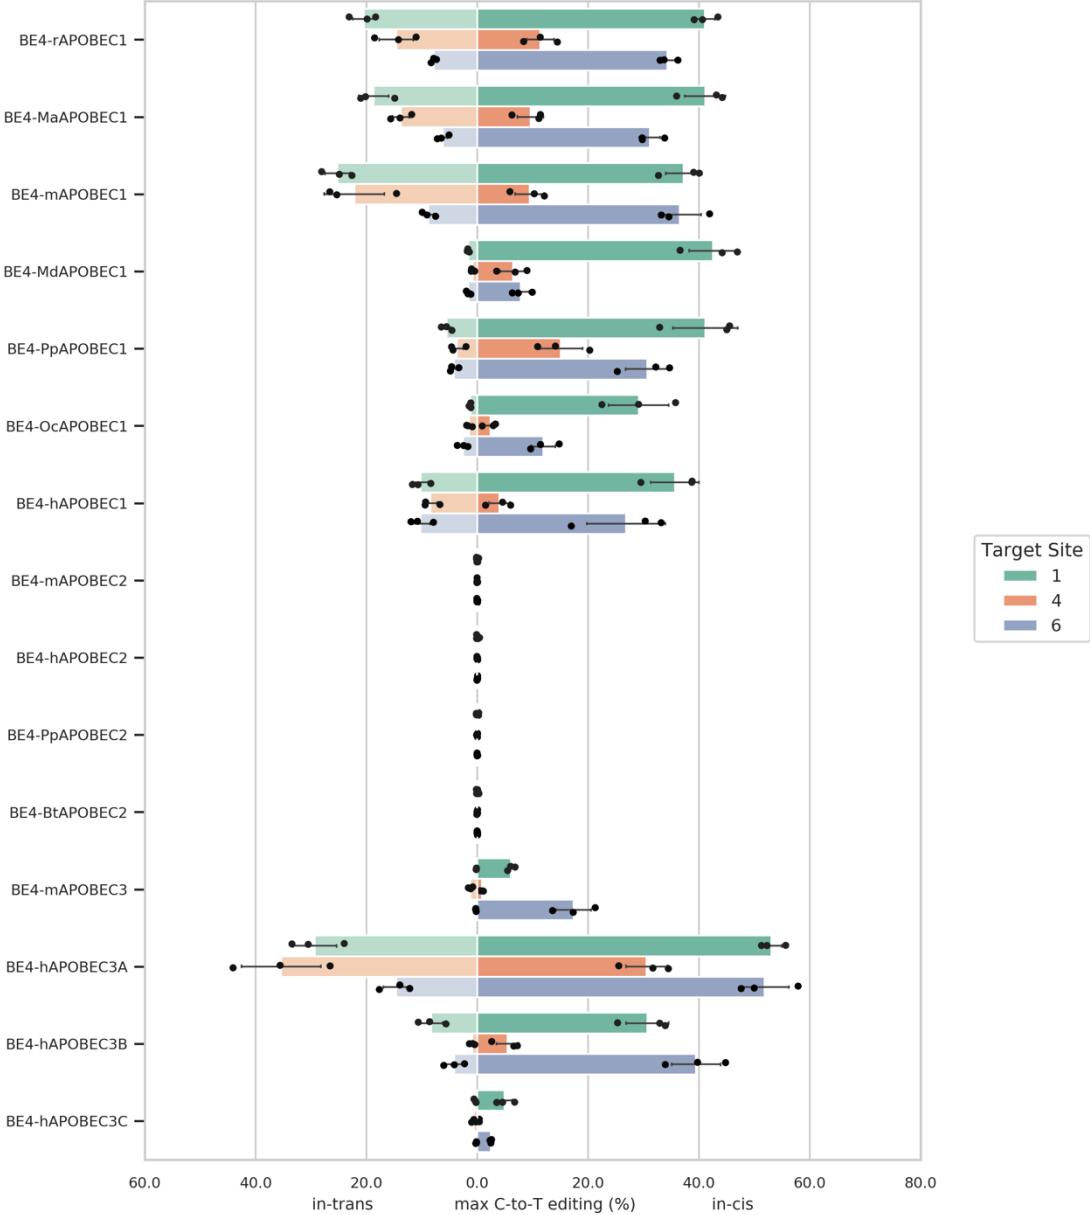

**Supplementary Figure 4 continued.** *In cis/in trans* editing activities of CBEs tested in 1<sup>st</sup> round screening at site 1, 4, 6. Base editing efficiencies were reported for the most edited base in the target sites. Values and error bars reflect the mean and s.d. of n=3 independent biological replicates. All data presented are provided as source data.

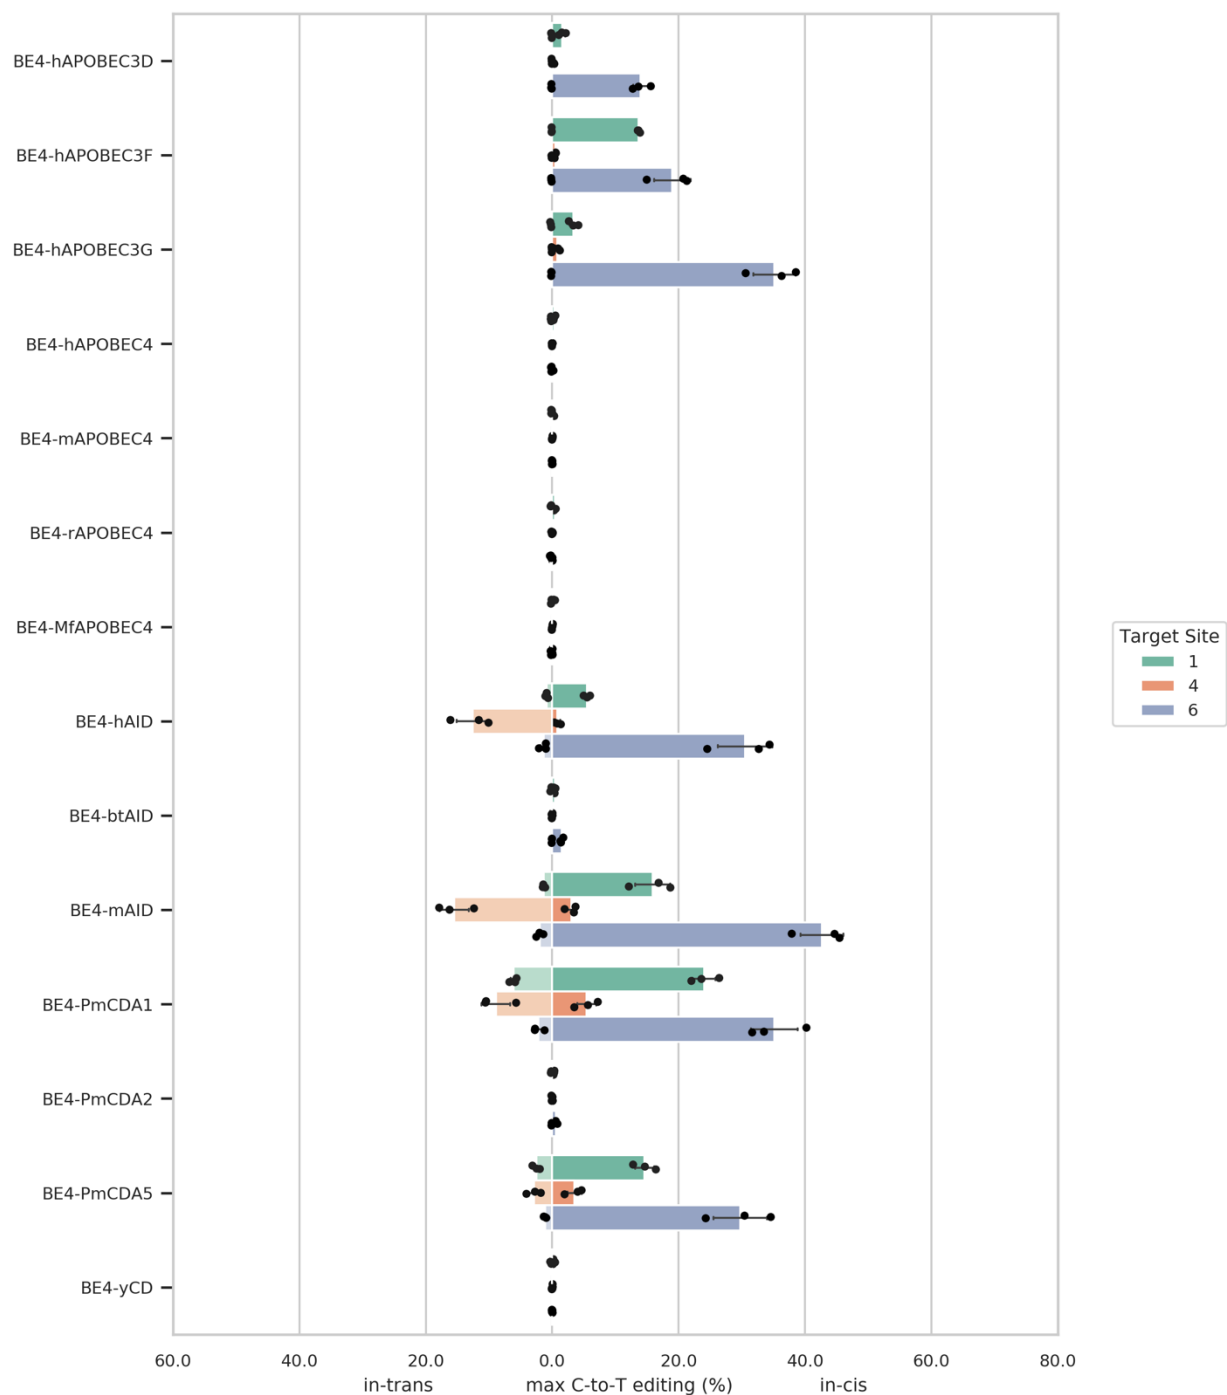



**Supplementary Figure 5.** Sequence alignment of CBEs tested in the 1<sup>st</sup> round screening.

The amino acid residues that align to HiFi mutations in rAPOBEC1 are highlighted.

```

          33              52              90              120
rAPOBEC1  -ELRKETCLLYEINWG...IWRHTSQNTNK...CSITWFLSWSPC...RYPHVTLFIYIARLYHHA-
MdAPOBEC1 -ELRKETCLLYEIKW-...IWRHSNQNTSQ...CSITWFLSWSPC...HYPNVTLAIFISRLYWHM-
MaAPOBEC1 -ELRKETCLLYEIRW-...IWRHTGQNTSR...CSIVWFLSWSPC...GHPNVTLFIYAARLYHHT-
mAPOBEC1  -ELRKETCLLYEINW-...VWRHTSQNTSN...CSITWFLSWSPC...RHPYVTLFIYIARLYHHT-
OcAPOBEC1 -ELRKEACLLYEIKW-...TWRSSGKNTTN...CSITWFLSWSPC...QHPGVTLIIFVARLFOHM-
hAPOBEC1  -ELRKEACLLYEIKW-...IWRSSGKNTTN...CSITWFLSWSPC...RHPGVTLVIYVARLFWHM-
PpAPOBEC1 -ELRKETCLLYEIKW-...IWRSSGKNTTN...CSITWFLSWSPC...QHPGVTLVIYVARLFWHW-
mAPOBEC3  -YHRMKPYLCYQLEQ-...--KGCLLSEK...VTITCYLTWSPC...DRPDLILHIYTSRLYFHW-
hAPOBEC3D -CGRNESWLCFTMEV-...FRKRGVFRNQV...YEVTWYTSWSPC...RHSNVNLTIFTARLCYFW-
hAPOBEC3F -YGRNESWLCFTMEV-...SWKRGVFRNQV...YEVTWYTSWSPC...RHSNVNLTIFTARLYFW-
hAPOBEC3C -NDRNETWLCFTVEG-...SWKTGVFRNQV...YQVTWYTSWSPC...RHSNVNLTIFTARLYYFQ-
hAPOBEC3G -RGRHETYLCEYEVER-...NQRRGFLCNOA...YRVTCTFSWSPC...KNKHVSLCIFTARIYDD--
hAPOBEC3A -IGRHKTYLCEYEVER-...DQHRGFLHNQA...YRVTWFISWSPC...ENTHVRLRIFAARIYDY--
hAPOBEC3B -LRRRQTYLCEYEVER-...DQHMGFCLNEA...YRVTWFISWSPC...ENTHVRLRIFAARIYDY--
rAPOBEC4  -TYPQTKHLTFYELR-...GLASNCTGSHT...RHIIILYSNNSPC...NYPEVTLVFFSOLYHTEM
hAPOBEC4  -TFPQTKHLTFYELK-...GHASSCTGNYI...RHIIILYSNNSPC...TYPGITLSIYFSOLYHTEM
mAPOBEC4  -KGRHETYLCEYVVKR-...SLDFGHLRNKS...YRVTWFTSWSPC...WNPNLRLRIFTARLYFCE-
MfAPOBEC4 -TYPQTKHLTFYELK-...GHASSCTGNYI...RHIIILYSNNSPC...TYPGITLSIYFSOLYHTEM
PmCDA2    -QKPRGTVILFYVEG-...AVNYNKQGTSI...CTLHCYSTYSPC...-STGVRVVIHCCRIYELDV
PmCDA1    -TERHRTYVIFDVVKP-...LW--GYIINNP...YAMTWYMSWSPC...EEQGHTLTMHFSRIYDRDR
PmCDA5    -TERHRTYVIFDVVKP-...LW--GYIINNP...YAMTWYMSWSPC...EEQGHTLMMHFSRIYDRDR
hAID     -KGRRETYLCEYVVKR-...SLDFGYLRNKN...YRVTWFTSWSPC...GNPNLSLRIFTARLYFCE-
mAID     -KGRRETYLCEYVVKR-...SLDFGYLRNKN...YRVTWFTSWSPC...GNPNLSLRIFTARLYFCE-
BtAID    -KGRHETYLCEYVVKR-...SLDFGHLRNKA...YRVTWFTSWSPC...GYPNLRLRIFTARLYFCDK
BtAPOBEC2 -SGRNKTFLCYVVEA-...QASRGYLEDEH...YMTWYVSSSPC...KTKNLRLLLILVGRLFMWE-
mAPOBEC2 -SGRNKTFLCYVVEV-...QATQGYLEDEH...YNVTWYVSSSPC...KTKNLRLLLILVSRLFMWE-
hAPOBEC2 -SGRNKTFLCYVVEA-...QASRGYLEDEH...YNVTWYVSSSPC...KTKNLRLLLILVGRLFMWE-
PpAPOBEC2 -SGRNKTFLCYVVEA-...QASRGYLEDEH...YNVTWYVSSSPC...KTKNLRLLLILVGRLFMWE-
yCD      ----EALGYKEGG-...NKDGSVLGRGH...KDTTLYTTLSPC...---GIPRCVVGENVNF---

```

**Supplementary Figure 6.** *In cis/in trans* activities of BE4-PpAPOBEC1 and BE4-PpAPOBEC1 with HiFi mutations at site 1 to 10. Base editing efficiencies were reported for the most edited base in the target sites. Values and error bars reflect the mean and s.d. of n=4 independent biological replicates. All data presented are provided as source data.

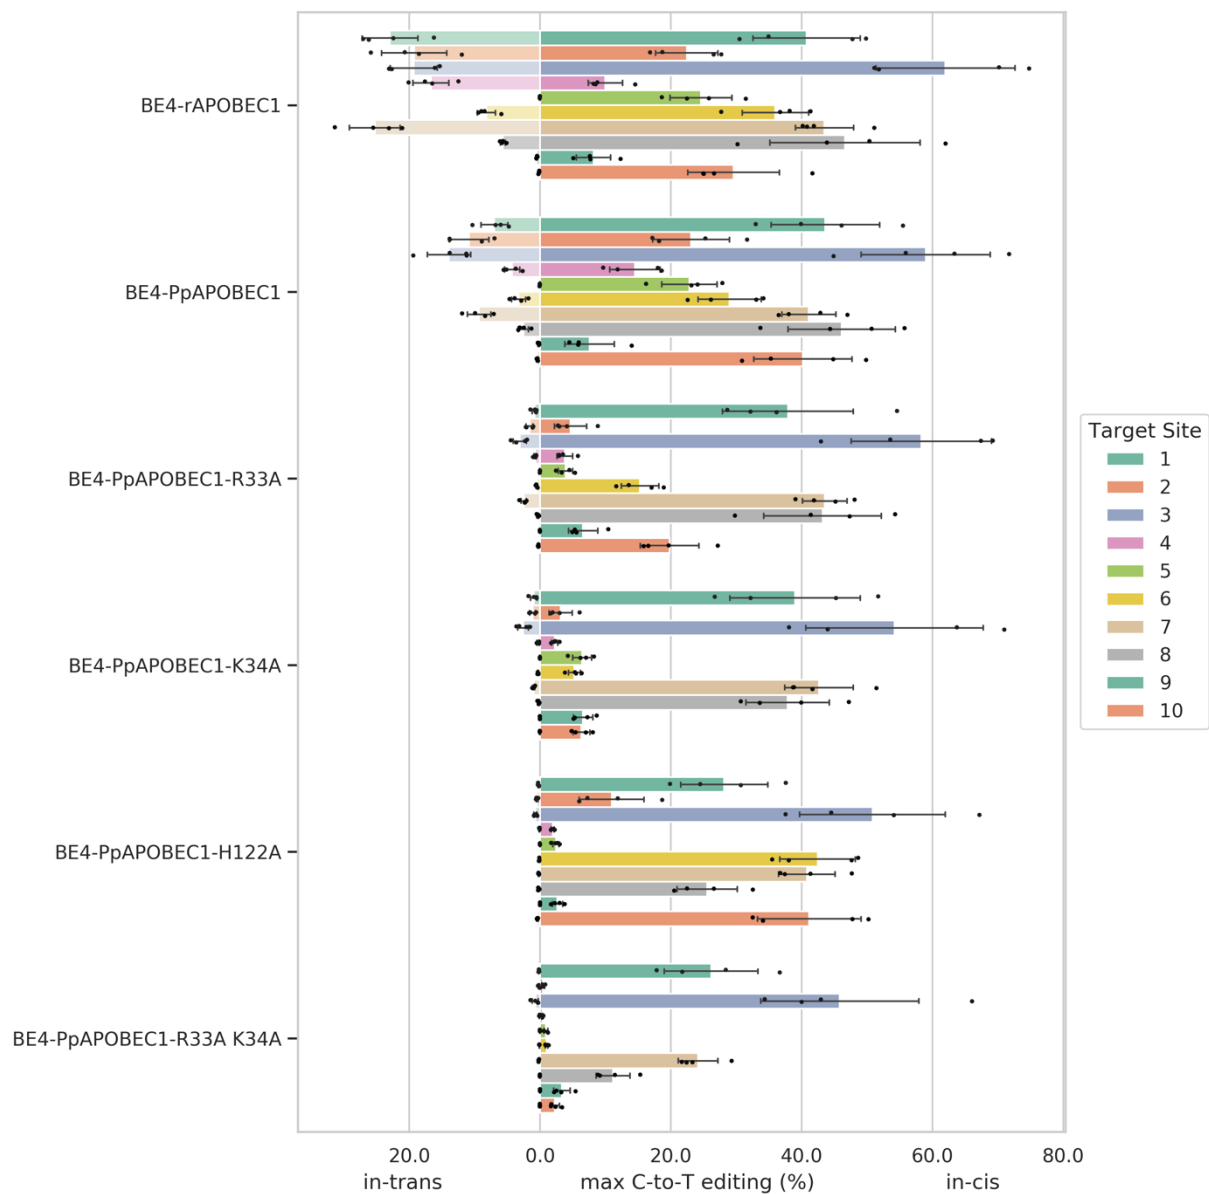

**Supplementary Figure 7.** *In cis/in trans* editing activities of CBEs tested in 2<sup>st</sup> round screening at site 1, 4, and 6. Base editing efficiencies were reported for the most edited base in the target sites. Values and error bars reflect the mean and s.d. of n=3 independent biological replicates. All data presented are provided as source data.

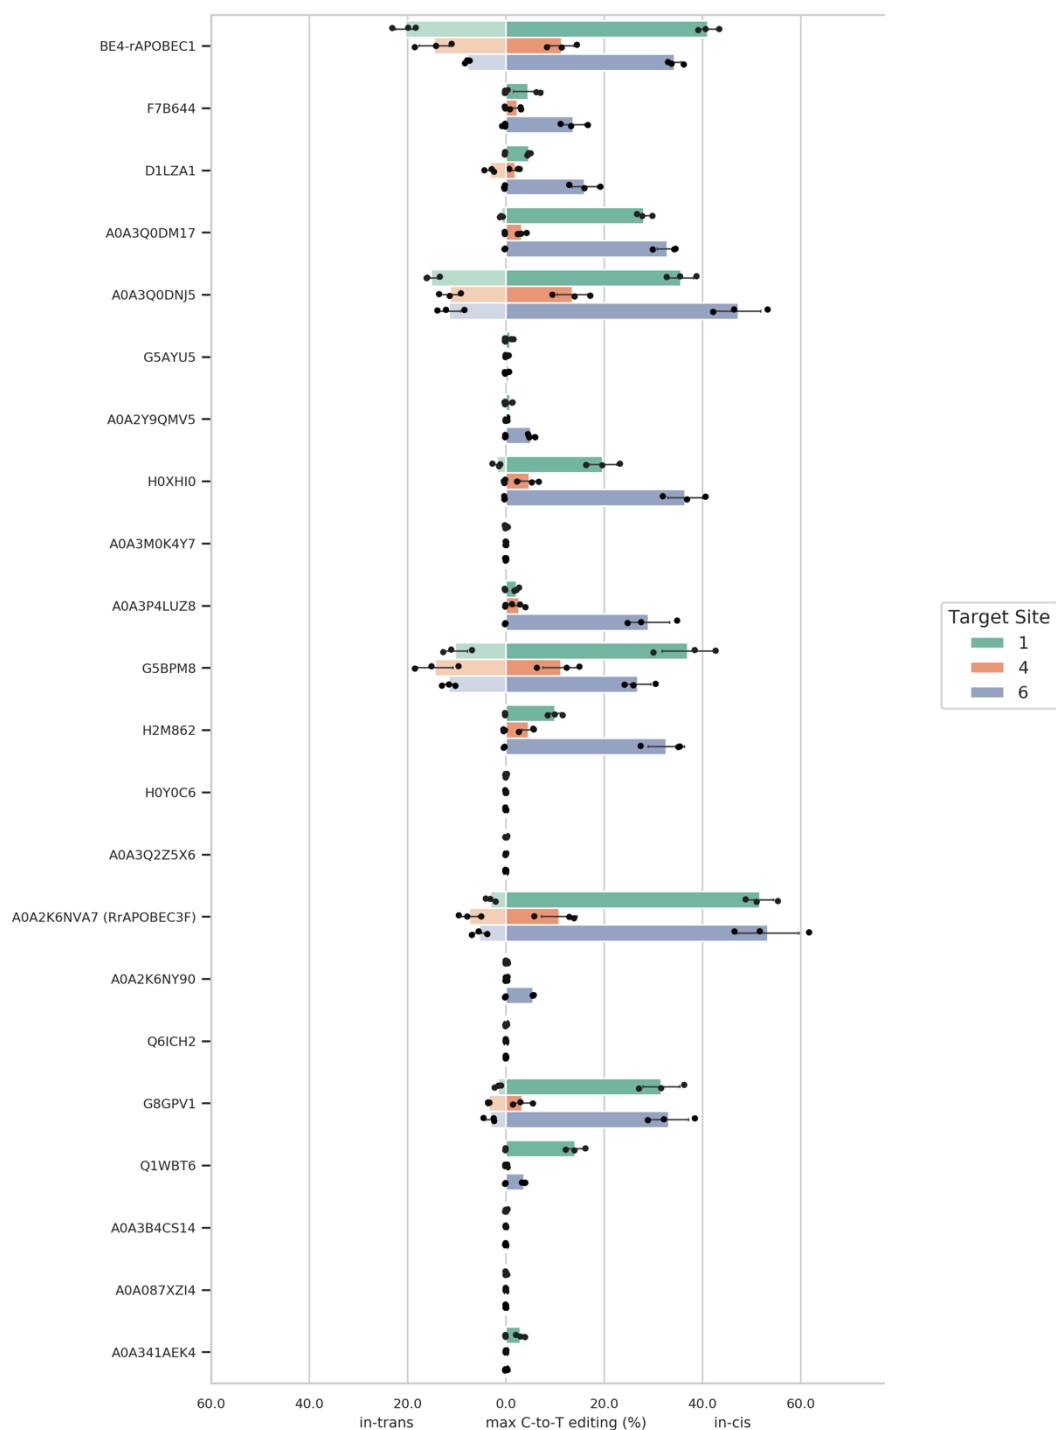

**Supplementary Figure 7 continued.** *In cis/in trans* editing activities of CBEs tested in 2<sup>st</sup> round screening at site 1, 4, and 6. Base editing efficiencies were reported for the most edited base in the target sites. Values and error bars reflect the mean and s.d. of n=3 independent biological replicates. All data presented are provided as source data.

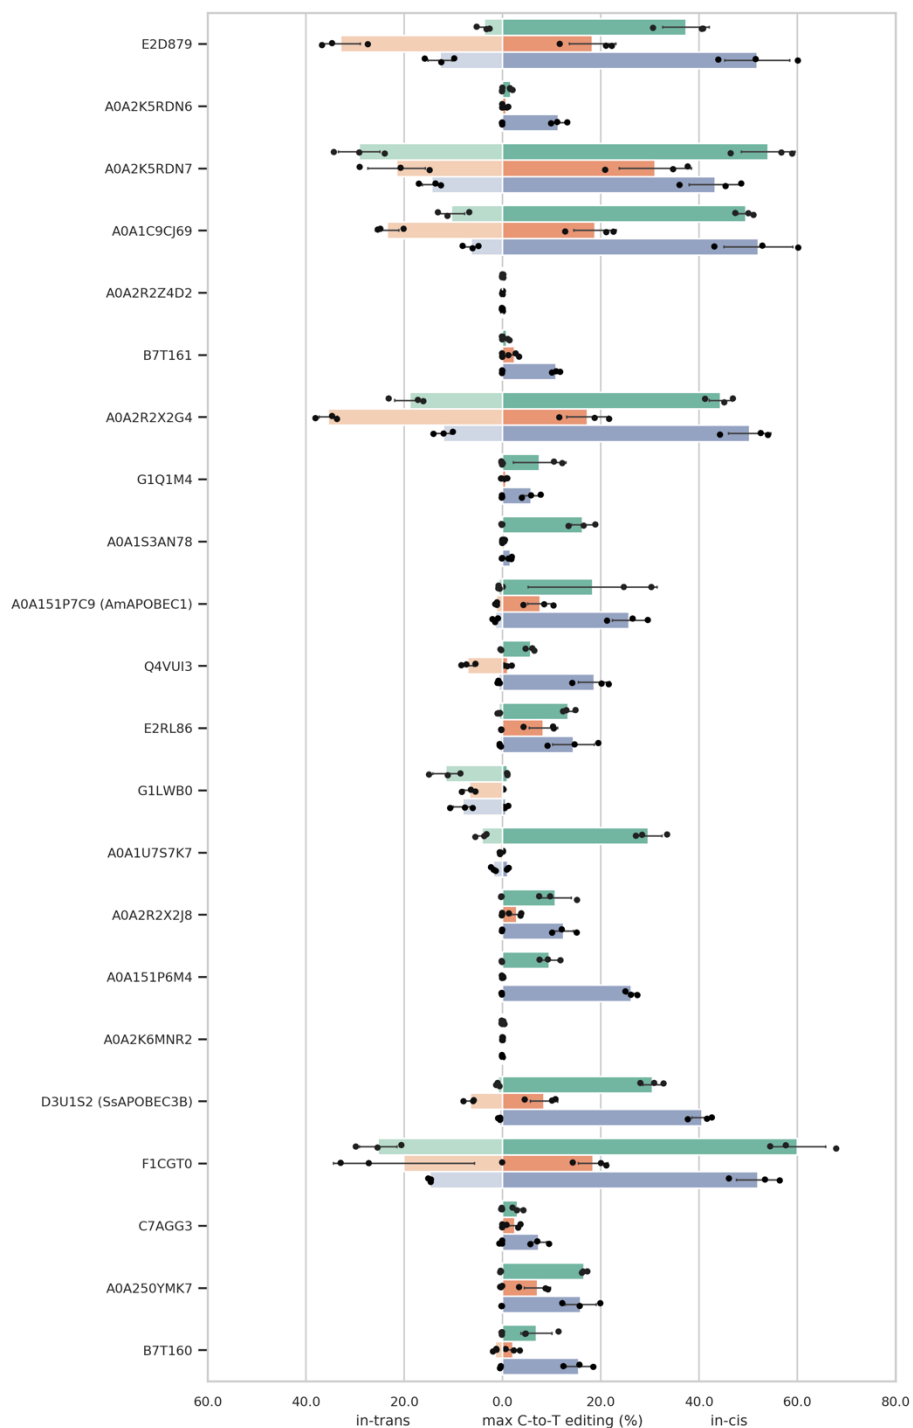

**Supplementary Figure 8.** *In cis/in trans* editing activities of next generation CBEs at site 1 to 10. Base editing efficiencies were reported for the most edited base in the target sites. Values and error bars reflect the mean and s.d. of n=4 independent biological replicates. All data presented are provided as source data.

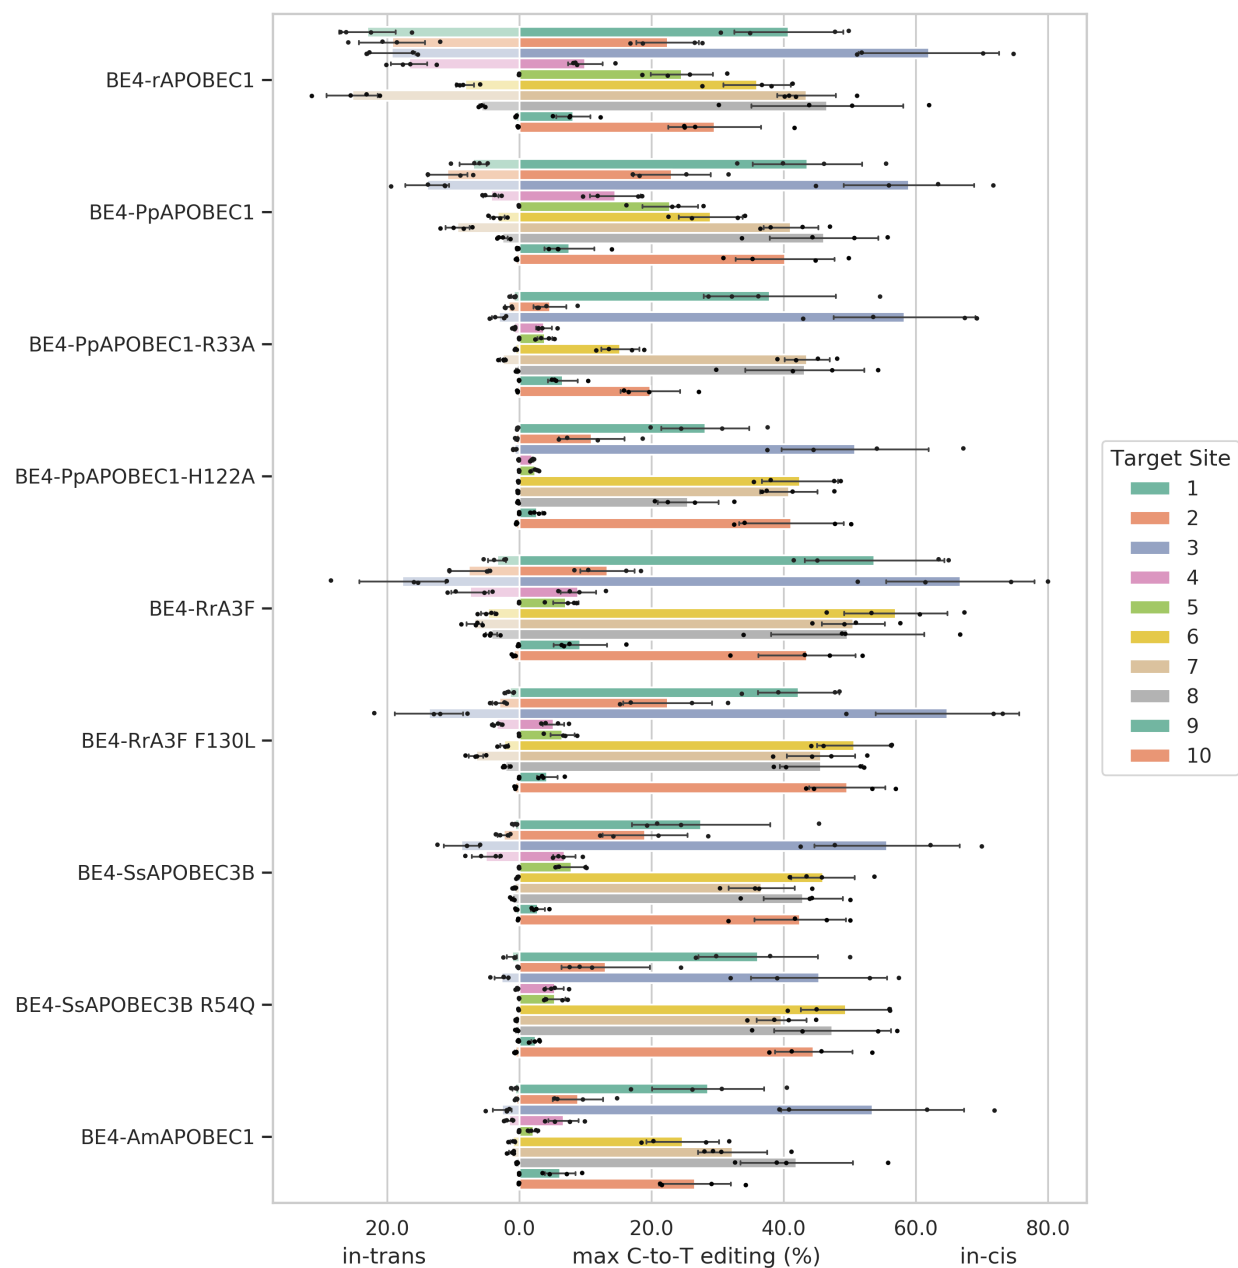

**Supplementary Figure 9.** Editing window of CBEs shown in Supplementary Figure 8 at site 1 to 10. Values reflect the mean of n=4 independent biological replicates. *In cis* and *in trans* editing are presented as blue and orange heatmaps respectively. All data presented are provided as source data.

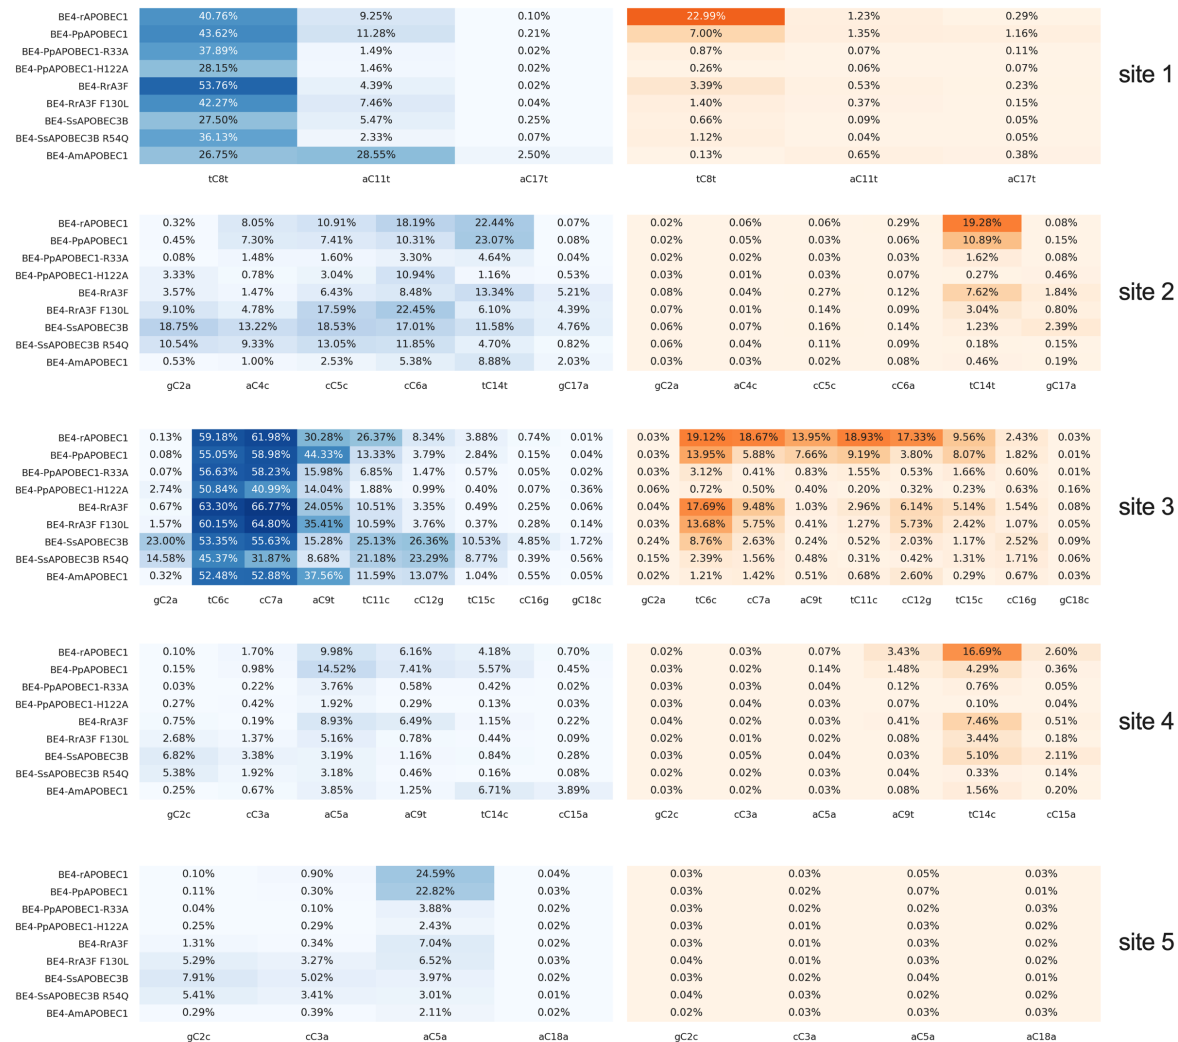

**Supplementary Figure 9 continued.** Editing window of CBEs shown in Supplementary Figure 8 at site 1 to 10. Values reflect the mean of n=4 independent biological replicates. *In cis* and *in trans* editing are presented as blue and orange heatmaps respectively. All data presented are provided as source data.

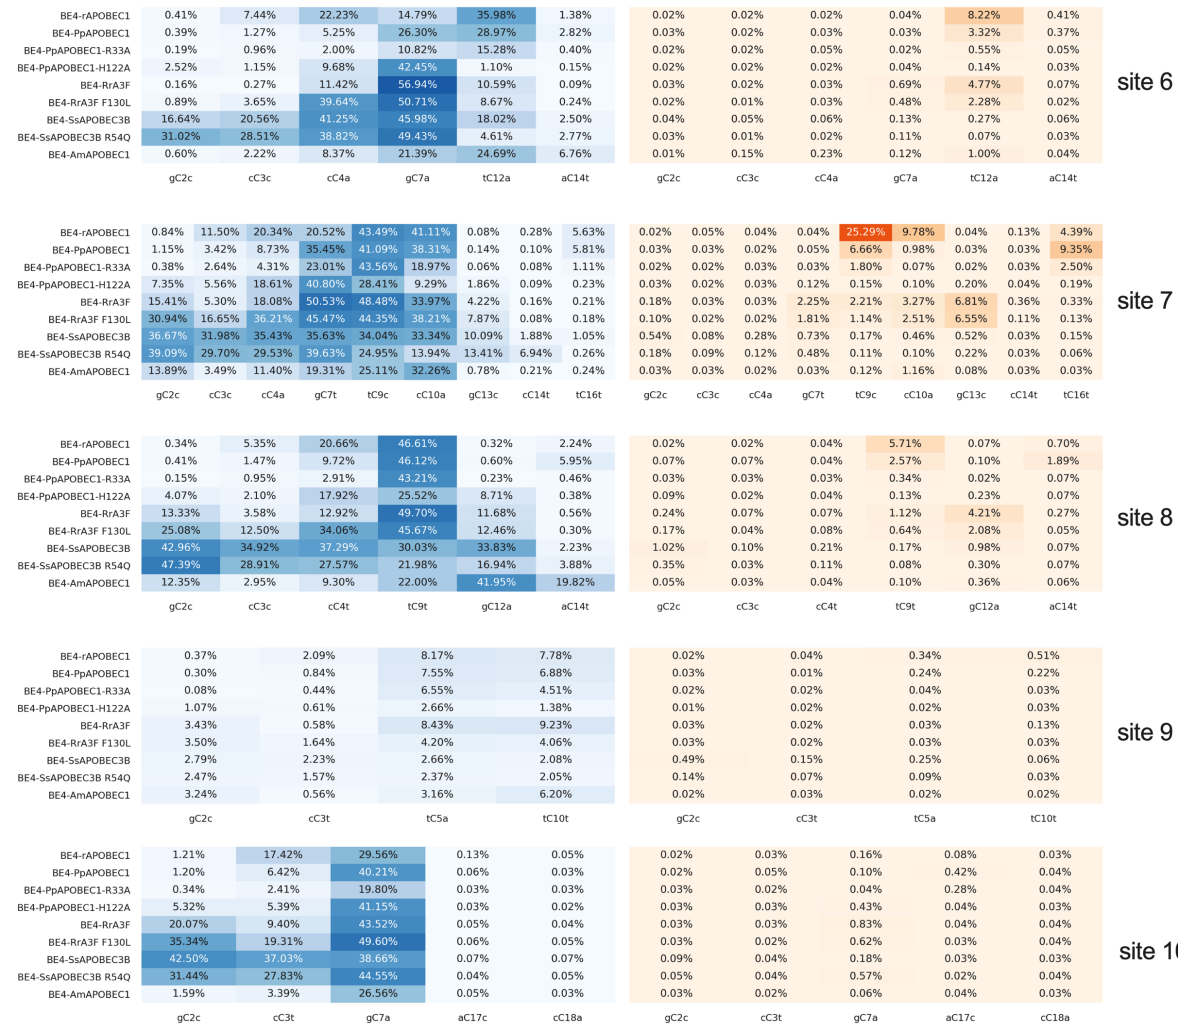

**Supplementary Figure 10.** Indel rates of CBEs shown in Supplementary Figure 8 at site 1 to 10. Values used to generate the heatmap reflect the mean of n=4 independent biological replicates. All data presented are provided as source data.

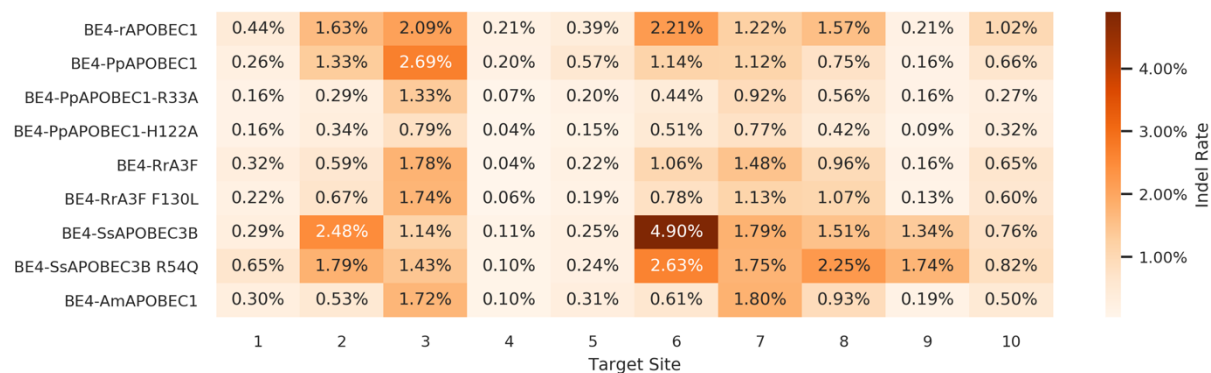



**Supplementary Figure 11.** Percentage of max C-to-T editing efficiency of CBEs tested in 3<sup>rd</sup> round screening at site 1, or 24 (\*). Data is from single experiment with no replication. The percentage of max C-to-T for the control (BE4-rAPOBEC1) at site 1 was 40.1% and \*48.2% at site 24. Star symbol indicates editing efficiency was measured at site 24, while no star indicates editing efficiency was measured at site 1. Uniprot IDs for the deaminases in CBEs are listed.

| Deaminase ID | max C-to-T | Deaminase ID | max C-to-T | Deaminase ID | max C-to-T | Deaminase ID | max C-to-T |
|--------------|------------|--------------|------------|--------------|------------|--------------|------------|
| A0A182D0J1   | *0.03      | U7QZM1       | 0.173      | A0A1H7EYS3   | 0.076      | A0A2W0H8Y3   | 0.094      |
| A0A2D6EXD2   | *0.031     | A0A081CH48   | 0.322      | H8GQX8       | 0.143      | A0A261BDB7   | 0.068      |
| F7YVM7       | *0.064     | A0A3D3HMU1   | 0.216      | A0A0S8HZN3   | 0.071      | A0A2E1PHI6   | 0.06       |
| A0A3M6UNF1   | *0.049     | A0A1N5WT13   | 0.207      | E3SF31       | 0.159      | A0A378LUA7   | 0.091      |
| A0A2G3K826   | *0.053     | X0SAC5       | 0.048      | F8AAC6       | 0.058      | A0A139HQ78   | 0.752      |
| K1ZCJ4       | 0.06       | A0A3B81C10   | 0.05       | A0A2H4ZNK4   | 0.08       | A0A2A9FXV0   | 0.089      |
| A0A1G3PNQ8   | 0.042      | A0A2N9P8B9   | 0.032      | A0A239N5N1   | 0.039      | A0A1A8AG96   | 0.056      |
| A0A1G0PGF4   | 0.089      | K1KX30       | 0.077      | A0A328VTR2   | 0.039      | A0A3E2VN88   | 0.042      |
| A0A0P4WGY5   | 0.047      | R4XI84       | 0.141      | A0A103YG48   | 0.292      | A0A2D5ZRJ2   | 0.169      |
| A0A3D8IG27   | 0.04       | A0A239CVF7   | 0.127      | W5M1M8       | 0.061      | A0A1B8WPS3   | 0.206      |
| A0A351C8C4   | 0.103      | A0A1Q3NME1   | 0.075      | A0A3N5YPZ2   | 0.097      | A0A1W5ZQK9   | 0.066      |
| A0A1G6V2K7   | 0.067      | A0A2G6N4N7   | 0.054      | A0A2A9NC86   | 0.036      | A0A378V0W4   | 0.093      |
| F2NP91       | 0.018      | A0A0G0RBB8   | 0.023      | A0A2D6RD43   | 0.067      | I3XF03       | 0.051      |
| A0A316TX77   | 0.043      | A0A327L2Q5   | 0.133      | A0A0H3AVL6   | 0.07       | F8IEF3       | 0.074      |
| R6VYG3       | 0.03       | S2DR30       | 0.029      | A0A242H531   | 0.117      | A0A1G3M638   | 0.017      |
| A0A3C1HZ18   | 0.029      | A0A369QGF1   | 0.065      | A0A2R6XZE2   | 0.131      | A0A3D9LFR2   | 0.083      |
| A0A1M6KV24   | 0.054      | A0A1W6X4U4   | 0.046      | A0A139SHT6   | 0.029      | A0A3B9YGB5   | 0.156      |
| A0A2U0T9B4   | 0.107      | A0A238BW09   | 0.149      | A0A261DBH2   | 0.077      | A0A182F569   | 0.066      |
| A0A2K9PN08   | 0.096      | A0A1J5H6Z0   | 0.05       | A0A2N0XZK6   | 0.641      | A0A264Z0D4   | 0.051      |
| F4PWM7       | 0.033      | A0A3C2D945   | 0.005      | A0A1V5R0F9   | 0.225      | A0A1L9Q1R3   | 0.201      |

**Supplementary Figure 12.** Homology models of selected four cytidine deaminases based on existing crystal structures. **a:** homology model of PpAPOBEC1 is based on based on a putative APOBEC3G structure (PDB ID 5K81); RrA3F is based on Vif-binding Domain of hAPOBEC3F (PDB ID 3WUS); AmAPOBEC1 is based on a hAPOBEC3B N-terminal domain (PDB ID 5TKM); SsAPOBEC3B is based on Vif-binding Domain of hAPOBEC3F (PDB ID 3WUS). **b:** sequence alignment of the selected four cytidine deaminases with rAPOBEC1.

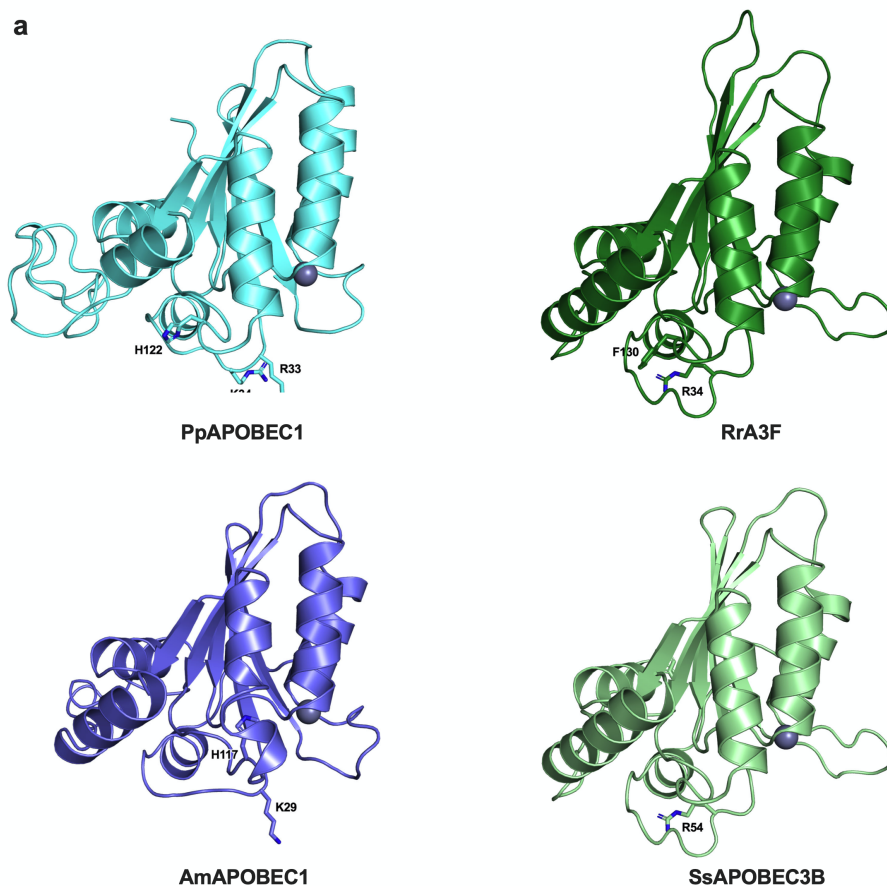

**b**

|            | 33                      | 52                | 90               | 120    |    |
|------------|-------------------------|-------------------|------------------|--------|----|
| rAPOBEC1   | -LRKETCLLYEI...NGRHSIW  | RHTSQNT...SITWFLS | WSPCGEC...YIARLY | YHHADP | 59 |
| PpAPOBEC1  | -LRKETCLLYEI...KMSRKIW  | RSSGKNT...SITWFLS | WSPCWEC...YVARLF | FWHMDQ | 59 |
| SsAPOBEC3B | SGRNRSYICCV...EFFQGIF   | QVPPD...YVTWFIS   | WSPCCEC...SAARLY | YFWKS  | 60 |
| AmAPOBEC1  | -GTKEAHLLEI...KKYGKPL   | LHWCQV...YVTWYLS  | WSPCADC...YVAQL  | YYHTEE | 59 |
| RfA3F      | YGRNETWLCFTV...E--KGVFR | LNQVDPE...QVTWYTS | WSPCPEC...YTARLY | YFWDT  | 58 |

**Supplementary Figure 13.** Guided off-target editing of selected next generation CBEs.

**a**, editing efficiency of next generation CBEs on HEK2, HEK3, HEK4 sites and **b**, reported guided off-target sites for HEK2 sgRNA, **c**, HEK3 sgRNA and **d**, HEK4 sgRNA. Base editing efficiencies were reported for the most edited base in the target sites. Values and error bars reflect the mean and s.d. of n=3 independent biological replicates. All data presented are provided as source data.

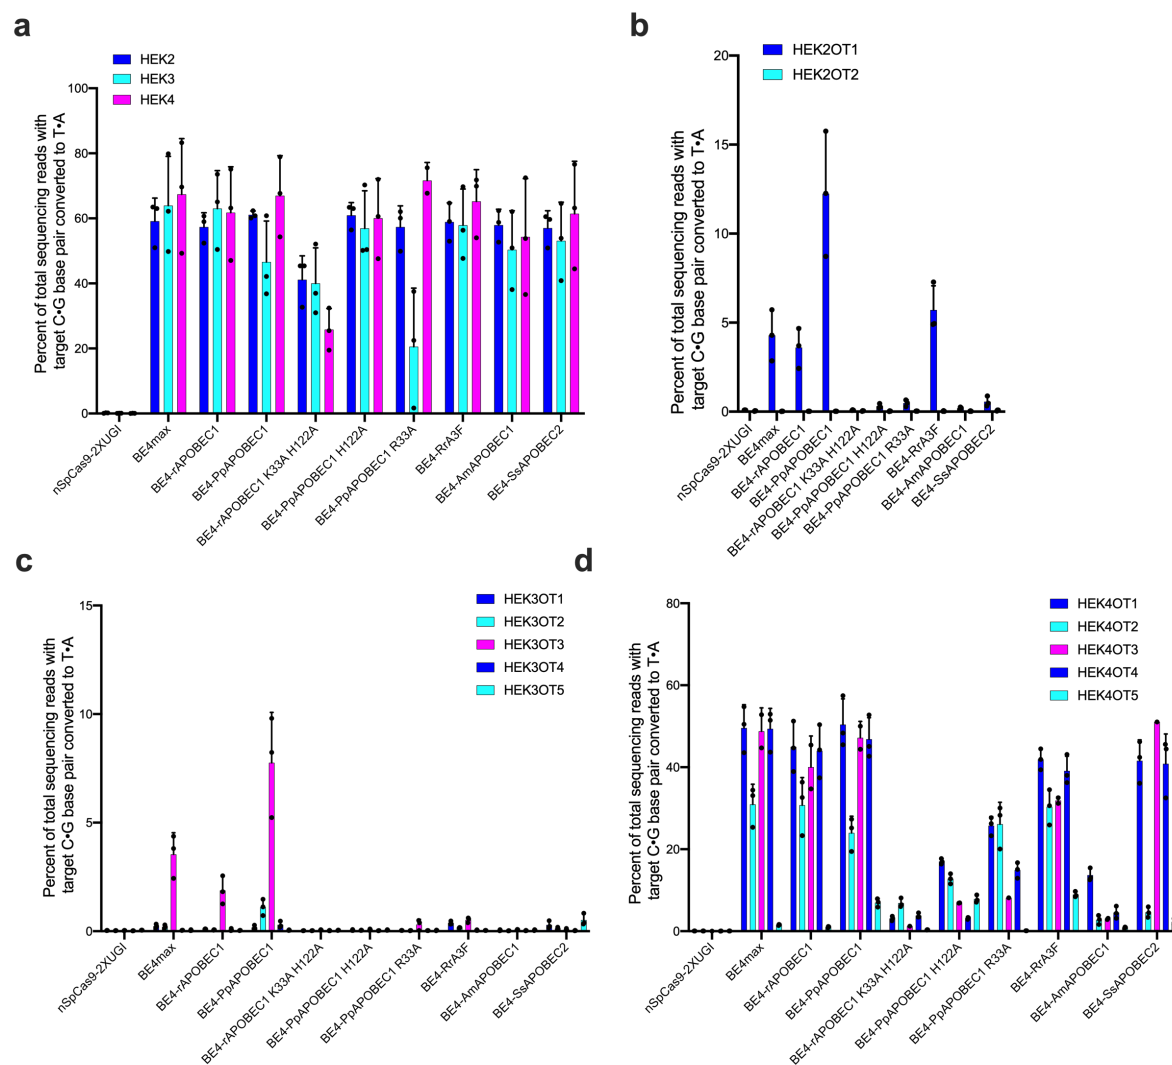

**Supplementary Figure 14.** Quantification of CBE protein concentration in HEK293T cells transfected with plasmids encoding base editors. Protein concentration of base editors was quantified by measuring the total Cas9 protein concentration and normalized to the amount of total protein in cell lysate. BE protein concentration was normalized to that of BE4-rAPOBEC1. Values and error bars reflect the mean and s.d. of n=2, 3, or 5 independent biological replicates, as can be determined for each sample by the number of included data in the graph. All data presented are provided as source data.

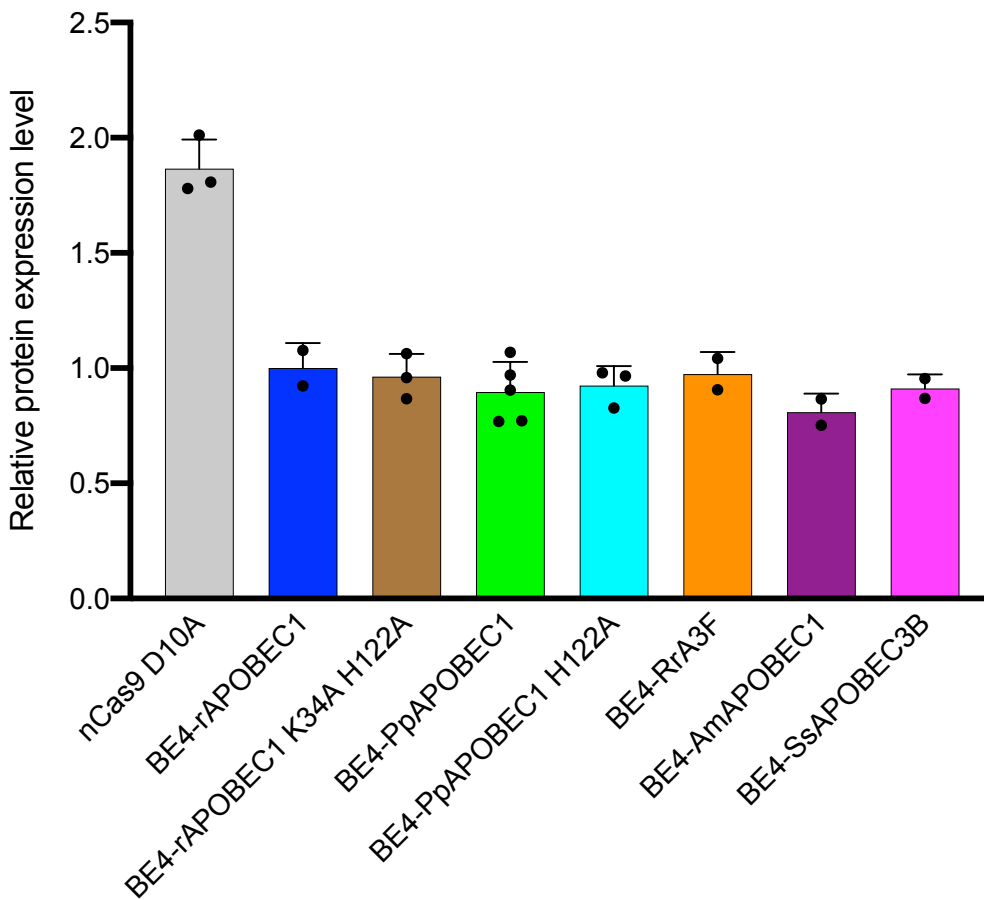

**Supplementary Figure 15.** Whole genome sequencing experiments to evaluate guide-independent cytidine deamination activity from base editors<sup>1</sup>. **a**, whole genome sequencing of single cell expansions to detect guide-independent cytidine deamination in HEK293T cells treated with base editor mRNA or plasmids. Editing efficiency from plasmids (**b**) or mRNA (**c**) transfection by amplicon sequencing of the target site. B2M guide sequence is ACTCACGCTGGATAGCCTCC. All data presented are provided as source data.

**a**

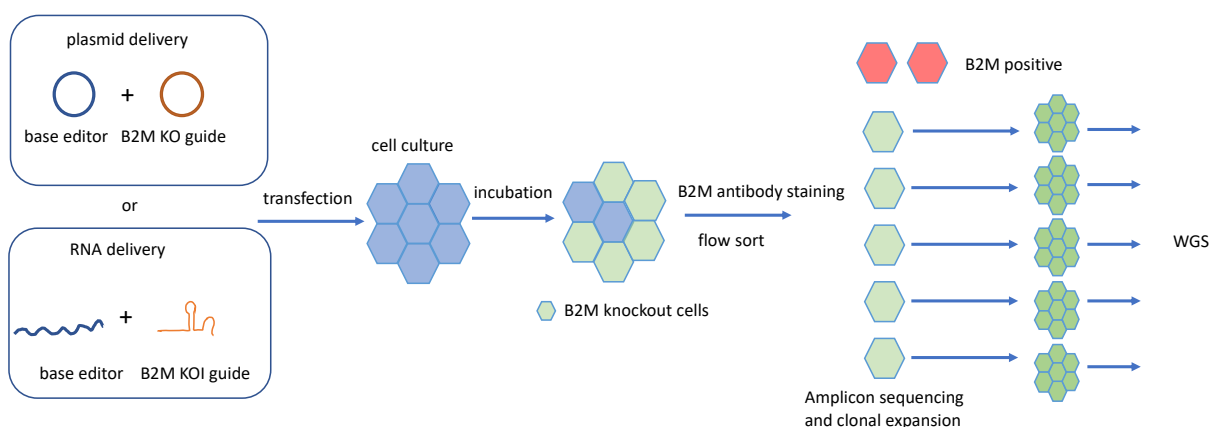

**b**

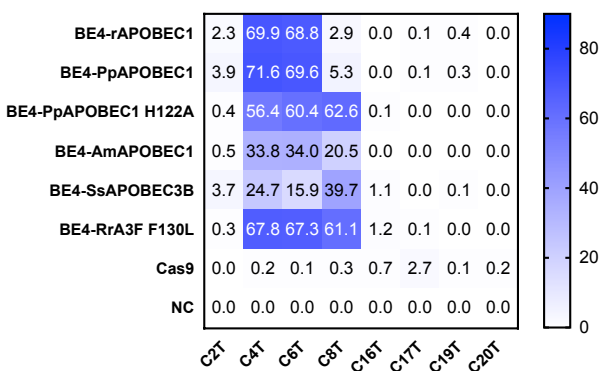

**c**

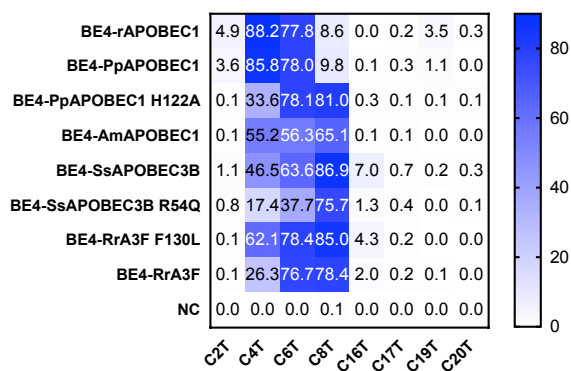

**Supplementary Figure 16.** C to U editing efficiency of selected CBEs on ssDNA substrates in *in vitro* enzymatic assay. The editing efficiencies were measured at 43 cytosines cytidines in ssDNA oligo 2-5 after 24 h incubation, and group by difference base prior to the target C. The sequences of these 4 substrates were listed in supplementary Table 3. Individual data points represent the mean value from n=2 independent biological replicates of Y=2 experiments. All data presented are provided as source data.

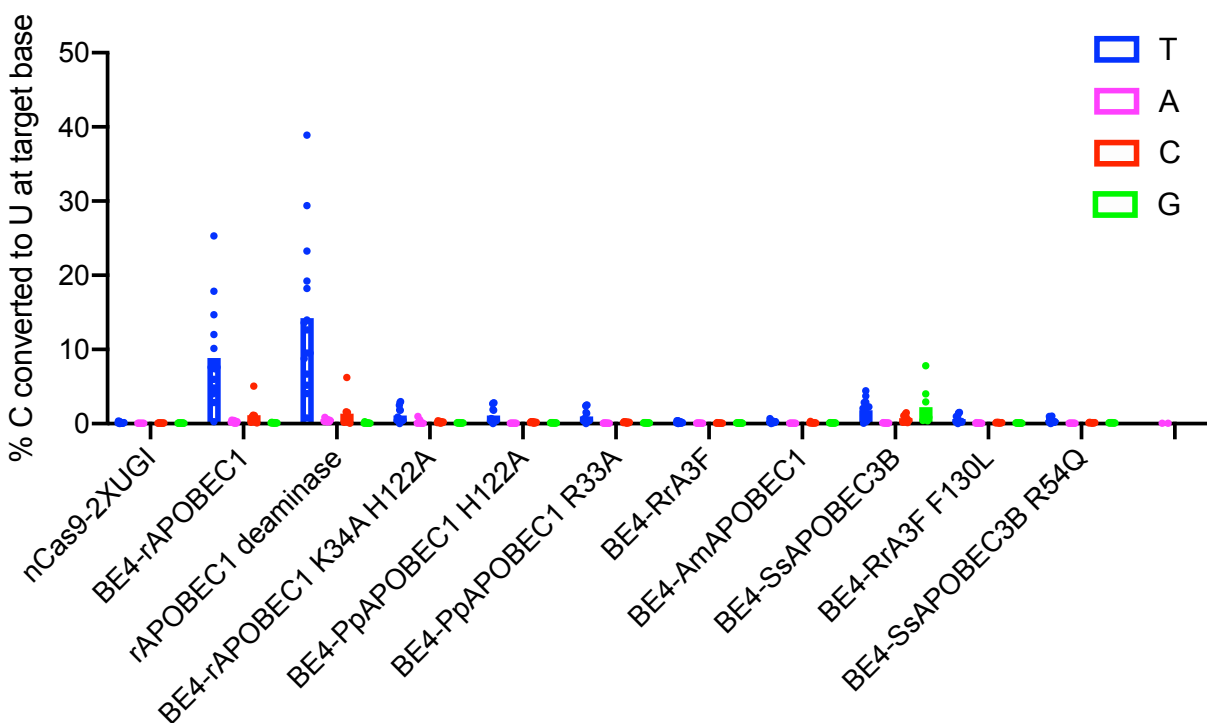

**Supplementary Table 1. Amino acid sequences of all deaminases tested in this study.**

| Gene /construct name | Species/pfam ID              | Amino acid sequences (5'-3')                                                                                                                                                                                                                                                                                                                                                                                                                                 |
|----------------------|------------------------------|--------------------------------------------------------------------------------------------------------------------------------------------------------------------------------------------------------------------------------------------------------------------------------------------------------------------------------------------------------------------------------------------------------------------------------------------------------------|
| rAPOBEC1             | <i>Rattus norvegicus</i>     | MSSETGPVAVDPTLRRRIEPEHEFEVFFDPRELKRETCCLLYEINWGGRRHSIWRHTSQNTNKHVEVNFIEKFTTERYFCP<br>NTRCSITWFLSWSPCGECSRAITEFLSRYPHVTLFIYIARLYHHADPRNRQGLRDLISSGVTIQIMTEQESGYCWRNFV<br>NYSPTSNEAHWPYPHPLWVRLVLELYCIILGLPCLNLRKQPLTFFFTIALQSCHYQRLPPHILWATGLK                                                                                                                                                                                                                |
| mAPOBEC1             | <i>Mus musculus</i>          | MSSETGPVAVDPTLRRRIEPEHEFEVFFDPRELKRETCCLLYEINWGGRRHSVWRHTSQNTSNHVEVNFLEKFTTERYFRP<br>NTRCSITWFLSWSPCGECSRAITEFLSRYPVTLFIYIARLYHHTDQRNRQGLRDLISSGVTIQIMTEQEQCYCWRNFV<br>NYPPSNEAYWYPHPLWVRLVLELYCIILGLPCLKLRKQPLTFFFTITLQTCYQRIPPHLLWATGLK                                                                                                                                                                                                                    |
| MaAPOBEC1            | <i>Mesocricetus auratus</i>  | MSSETGPVVVDPTLRRRIEPEHEFDAFFDQGLRKEACCLLYEIRWGGRRHNIWRHTGQNTSRHVEINFIKFTSERYFYP<br>STRCSIVWFLSWSPCGECSKAITEFLSGHPNVTLFIYAARLYHHTDQRNRQGLRDLISRGTIRIMTEQEQCYCWRNF<br>VNYPPSNEVYWYPNLMWRLYALELYCIHLGLPCLKIKRRHQYPLTFFRLNLQSCHYQRIPPHILWATGFI                                                                                                                                                                                                                   |
| hAPOBEC1             | <i>Homo sapiens</i>          | MTSEKGPSTGDPTLRRRIEPEWFDVFDYDPRELKREACCLLYEIKWGMRSKIWRSSGKNTTNHVEVNFIEKFTSERDFHP<br>SMSCSITWFLSWSPCWECSQAIREFLSRHPGVTLVIYVARLFWHMDQQNRQGLRDLVNSGVTIQIMRASEYYHCW<br>RNFVNYPGDEAHWPQYPLWMLYALELHCILSLPCLKISRRWQNHLLTFFRLHLQNCYQTIPIPHILLATGLIHP<br>SVAWR                                                                                                                                                                                                       |
| PpAPOBEC1            | <i>Pongo pygmaeus</i>        | MTSEKGPSTGDPTLRRRIEPEWFDVFDYDPRELKRETCCLLYEIKWGMRSKIWRSSGKNTTNHVEVNFIEKFTSERRFHS<br>SISCSITWFLSWSPCWECSQAIREFLSQHPGVTLVIYVARLFWHMDQRNRQGLRDLVNSGVTIQIMRASEYYHCW<br>RNFVNYPGDEAHWPQYPLWMLYALELHCILSLPCLKISRRWQNHLLAFFRHLQNCYQTIPIPHILLATGLIHP<br>VTWR                                                                                                                                                                                                         |
| OcAPOBEC1            | <i>Oryctolagus cuniculus</i> | MASEKGPSNKDYTLRRRIEPEWFEVFFDPQELRKEACCLLYEIKWGAASSKTWRSSGKNTTNHVEVNFLEKLTSEGRGL<br>PSTCCSITWFLSWSPCWECSMAIREFLSQHPGVTLIIFVARLFQHMDRRNRQGLKDLVTSVTVRVMVSEYCYCW<br>ENFVNYPGKAAQWPRYPWRWMLYALELYCIILGLPCLKISRRHQKQLTFFSLTPQYCHYKMPPIYILLATGLLQPS<br>VPWR                                                                                                                                                                                                        |
| MdAPOBEC1            | <i>Monodelphis domestica</i> | MNSKTGPSVGDATLRRRIKPEWFAFFNPQELRKEACCLLYEIKWGNQNIWRHSNQNTSQHAEINFMKFTSERHF<br>NSSVRCISITWFLSWSPCWECSKAIRKFLDHYPNVTLAIFISRLYWHMDQQHRQGLKELVHSGVTIQIMSYSEYHYCW<br>RNFVDYPPQGEEDYWPYPYLWIMLYLELHCILGLPCLKISGSHSNLQALFLSLDQDCHYQKIPYNNVATGLVQPF<br>VTWR                                                                                                                                                                                                          |
| mAPOBEC2             | <i>Mus musculus</i>          | MAQKEEAAEAAPASQNGDDLENLEDPELKEIDLPPEIVTGVRLPVNFFKQFRNVEYSSGRNKTFLCYVVEVQS<br>KGGQAQATQGYLEDEHAGAHAEAAFFNTILPAFDPAKYNVTWYVSSSPCAACADRILKTLKTKNLRLLILVSRFLM<br>WEEPEVQAALKKLEAGCKLRIMKPDFFEYIWNQNFVEQEEGESKAFEPWEDIQENFLYEEKLADILK                                                                                                                                                                                                                             |
| hAPOBEC2             | <i>Homo sapiens</i>          | MAQKEEAAVATEAASQNGEDLENLDDPELKEIDLPPEIVTGERLPANFFKQFRNVEYSSGRNKTFLCYVVEAQQ<br>KGGQVQASRGYLEDEHAAAHAEEAFFNTILPAFDPALRYNVTWYVSSSPCAACADRIKTLKTKNLRLLILVGRFLM<br>WEEPEIQAALKKLEAGCKLRIMKPDFFEYIWNQNFVEQEEGESKAFEPWEDIQENFLYEEKLADILK                                                                                                                                                                                                                            |
| PpAPOBEC2            | <i>Pongo pygmaeus</i>        | MAQKEEAAAATEAASQNGEDLENLDDPELKEIDLPPEIVTGERLPANFFKQFRNVEYSSGRNKTFLCYVVEAQQ<br>KGGQVQASRGYLEDEHAAAHAEEAFFNTILPAFDPALRYNVTWYVSSSPCAACADRIKTLKTKNLRLLILVGRFLM<br>WEELEIQDALKKLEAGCKLRIMKPDFFEYIWNQNFVEQEEGESKAFEPWEDIQENFLYEEKLADILK                                                                                                                                                                                                                            |
| BtAPOBEC2            | <i>Bos taurus</i>            | MAQKEEAAAAEAPASQNGEVENLEDPELKEIDLPPEIVTGERLPAHYFKQFRNVEYSSGRNKTFLCYVVEAQS<br>KGGQVQASRGYLEDEHATNHAEEAFFNSIMPTFDPALRYMVTWYVSSSPCAACADRIVKTLNKTNLRLLILVGRFL<br>MWEPEIQAALRKLKEAGCKLRIMKPDFFEYIWNQNFVEQEEGESKAFEPWEDIQENFLYEEKLADILK                                                                                                                                                                                                                            |
| mAPOBEC3             | <i>Mus musculus</i>          | MQPQRLGPRAGMGPFLCGSHRKCYSPIRNLISQETFKFHKNLGYAKGRKDTFLCYEVTRKDCDPSVSLHHGVFKN<br>KDNIAEICFLYWFHDKVLKVLSPREEFKITWYMSWSPCFECAEQIVRFLATHHNSLDFSSRLYNVQDPETQQNLC<br>RLVQEGAQVAAMDLYEFKCKWKFVDNGGRRFRPWKRLTNFRYQDSKLQELRCPYISVPSSSSSTLSNICLTKGLP<br>ETRFVWVEGRRMDPLSEEFYSQFYNQVRKHLCYHRMKPYLCYQLEQFNQAPLKGCLLSEKKGQHAELFLDKIRS<br>MELSQVTITCYLWSPCPCAWQLAAFKRDRPDILHIYTSRLYFHWKRPFKGLCSLWQSGILVDVMDLPQFTDC<br>WTFNFPNKRPFWPKGLEIISRTRQRLRRIKESWGLQDLVNDGFLNLQGLPPMS |
| hAPOBEC3A            | <i>Homo sapiens</i>          | MEASPASGPRHLMDPHIFTSNFNNGIGRHKTYLCYEVERLDNGTSVKMDQHRGFLHNQAKNLLCGFYGRHAELRF<br>LDLVPSLQLDPAQIYRVTWFSWSPCFWGCAGEVRAFLQENTHVRIRIFAARIYDPLYKEALQMLRDAGAQVSI<br>MTYDEFKHCWDTFVDHQGCPFPWDGLDEHSQALSGLRAILQNQGN                                                                                                                                                                                                                                                    |
| hAPOBEC3B            | <i>Homo sapiens</i>          | MNPQIRNPMERMYRDTFYDNFENEPILYGRSYTWLCYEVKIKRGRSNLLWDTGVFRGQVYFKPQYHAEMCFLSWF<br>CGNQLPAYKCFQITWFSWTPCDVCVAKLAFLSEHPNVTLTISAARLYYWRDYRRALCRLSQAGARVTIMDYEE<br>FAYCWENFVYNEGQQFMPWYKFDENYAFHRTLKEILRYLMDPDTFTFNNDPLVLRRTQTYLCYEVERLDNGT<br>WVLMQDHMGFLCNEAKNLLCGFYGRHAELRFLDLVPSLQLDPAQIYRVTWFSWSPCFWGCAGEVRAFLQENT<br>HVLRIFAARIYDPLYKEALQMLRDAGAQVSIIMTYDEFYCWDTFVYRQGCQFPQWDGLEEHSQALSGLRAIL<br>QNQGN                                                        |
| hAPOBEC3C            | <i>Homo sapiens</i>          | MNPQIRNPMKAMYPTGFYFQFNLWEANDRNETWLCFTVEGIKRRSVSWKTGVFRNQVDSETHCHAERCFLS<br>WFCDDILSPNTKYQVTWYTSWSPDCAGEVAEFLARHSNVNLTIFTARLYYFYQPCYQEGRLSLSQEGVAVEIMDY<br>EDFKYCWENFVYNDNEPFPWKGLKTNFRLLKRRRESLQ                                                                                                                                                                                                                                                             |
| hAPOBEC3D            | <i>Homo sapiens</i>          | MNPQIRNPMERMYRDTFYDNFENEPILYGRSYTWLCYEVKIKRGRSNLLWDTGVFRGPVLPKRQSNHRQEVYFRFE<br>NHAEMCFLSWFCGNLPAARRFQITWFSWNPCLPCVVKVTKFLAEHPNVTLTISAARLYYRDRWRVLLRLH<br>KAGARVKIMDYEDFAYCWENFVCNEGQPFMPWYKFDNYASLHRTLKEILRNPEAMYPHIFYHFKNLLKACGR<br>NESWLCFTMEVTKHSAVFRKRGVFRNQVDPETHCHAERCFLSWFCDDILSPNTNYEVTWYTSWSPCEAGEVA                                                                                                                                               |

|           |                                 |                                                                                                                                                                                                                                                                                                                                                                                                                                                                                                                                                                                                                |
|-----------|---------------------------------|----------------------------------------------------------------------------------------------------------------------------------------------------------------------------------------------------------------------------------------------------------------------------------------------------------------------------------------------------------------------------------------------------------------------------------------------------------------------------------------------------------------------------------------------------------------------------------------------------------------|
|           |                                 | EFLARHSNVNLTIFTARLCYFWDTDYQEGCLCSLQEGASVKIMGYKDFVSCWKNFVYSDEPFKPKWGLQNTFRLLK<br>RRLREILQ                                                                                                                                                                                                                                                                                                                                                                                                                                                                                                                       |
| hAPOBEC3F | <i>Homo sapiens</i>             | MKPHFRNTVERMYRDTFSYNFYNRPIILSRRTVWLCYEVKTKGSPRPLDAKIFRGQVYSQPEHHAEMCFLSWFCG<br>NQLPAYKCFQITWVFSWTPCPCVAKLAELAEHPNVTLSAARLYYYWERDYRRALCRLSQAGARVKIMDDEEFA<br>YCWENFVYSEGPMPWYKFDNNYAFHLRHLKEILRNPMAMYPHFYFHKNLKAYGRNESWLCFTMEVVKHH<br>SPVSWKRGVFRNQVDPETHCHAERCFLSWFCDDILSPNTNYEVTWYTSWSPCECAGEVAEFLARHSNVNLTIFTA<br>RLYYFWDTDYQEGRLSLQEGASVEIMGYKDFKYCWENFVYNDEPFKPKWGLKYNFLFLDLSKLQEILE                                                                                                                                                                                                                       |
| hAPOBEC3G | <i>Homo sapiens</i>             | MKPHFRNTVERMYRDTFSYNFYNRPIILSRRTVWLCYEVKTKGSPRPLDAKIFRGQVYSELKYHPEMRFFHWF<br>WRKLHRDQEQEVTVWYISWSPCTKTRDMATFLAEDPKVTLTIFVARLYYFWDPDYQEAELRSLCQKRDGPRATMKI<br>MNYDEFQHCWSKVFVYSQRELFEWNNLPKYIILLHIMLGEILRHSMDPPTFTFNFNNEPWWVRGRHETLYCYEVER<br>MHNDDTWLLNQRRGLCNQAPHKHGFLEGRHAELCFDVIWPKLDLQDQYRVTCTFSWSPCFSCAQEMAKFISK<br>NKHVSICIFTARIYDDQGRCEQLRLAEAGAKISIMTYSEFKHCWDTFVDHQGCPFPWDGLDEHSQDLSGRLRAI<br>LQNQEN                                                                                                                                                                                                  |
| hAPOBEC4  | <i>Homo sapiens</i>             | MEPIYEEYLANHGTVKPYWLSFLSDCSNCPYHIRTGEEARVSLTEFCQIFGFPYGTTFPQTKHLTFYELKTS<br>KGHASSCTGNYIHPEMFLFEMNGYLSAIYNNDSIRHIILYSNNSPCNEANHCCKSMYNFLITYPGITLSIYFSQ<br>LHTE MDPFASAWNREALRSLASLWPRVVLSPISGGIWHSVLHSHFVSGVSGSHVFPILTGRALDRHNAEINAITG<br>VKKPYF TDVLLQTKRNPNTKAQEALESYPLNNAFPGQFFQMPSPGQLQPNLPPDLRAPVVFVVLPRDLPPMHM<br>GQNPKNP RNIVRHLNMPQMSFQETKDLGLRPTGRSVEIETEQAASSKEADEKKKKGGK                                                                                                                                                                                                                            |
| mAPOBEC4  | <i>Mus musculus</i>             | MDSLLMKQKFLYHFKNVRWAKGRHETLYCYVVKRRDSATSFLDFGHLRNKSGCHVVELLFLRYISDWLDPGR<br>CY RVTWFTSWSPCYDCARHVAEFLRWNPNSLRIFARLYFCEDRKAEPGLRRLHRAGVQIIMTFKDYFYCWNTFVE<br>NRERTFKAWEGLHENSRLRQLRILLPLVEVDDLDRDAFRMLGF                                                                                                                                                                                                                                                                                                                                                                                                        |
| rAPOBEC4  | <i>Rattus norvegicus</i>        | MEPLYEYLTHSGTIVKPYWLSVSLNCTNCPYHIRTGEEARVYPYTFEHTQFGFPWSTYPTKHLTFYELR<br>SSGNLIQ KGLASNCTGSHTHPESMLFERDGYLDSLIFHDSNRHIILYSNNSPCDEANHCCKSMYNFLITYPGITLSIYFSQ<br>LYHT TENQFPTSAWNREALRGLASLWVQVTLAISGGIWSILETFVSGISEGLTAVRPFTAGRTLDTRYNAYEIN<br>CITEVKKP YFTDALHSWQKENDQKQVWAASENQPLHNTTPAQWQPDMSQDCRTPAVFMLVPPYRDLPPHVN<br>PSPQKPRTV VRHLNTLQLSASKVKALRKSPPGRPVKKEEARKGSTRSQEANETNKSQKWKQTLFIKSNICHL<br>LREEQKIGILSSWSV                                                                                                                                                                                         |
| MfAPOBEC4 | <i>Macaca fascicularis</i>      | MEPTYEYLANHGTVKPYWLSFLSDCSNCPYHIRTGEEARVSLTEFCQIFGFPYGTTFYPTKHLTFYELK<br>TSSGSLVQ KGHASSCTGNYIHPEMFLFEMNGYLSAIYNNDSIRHIILYCNNSPCNEANHCCKSMYNFLITYPGITLSIYFSQ<br>LYHTE MDPFASAWNREALRSLASLWPRVVLSPISGGIWHSVLHSHFVSGVSGSHVFPILTGRALDRYNAEIN<br>AITGKPPFF TDVLLHTKRNPNTKAQMALESYPLNNAFPGQSFQMTSGIPDLRAPVVFVLLPRDLPPMHM<br>GQDPNKPRIIRHL NMPQMSFQETKDLERLPTRRSVETVEITERFASSKQAEETKKKKGGK                                                                                                                                                                                                                           |
| hAID      | <i>Homo sapiens</i>             | MDSLLMNRKFLYQFKNVRWAKGRRETYLYCYVVKRRDSATSFLDFGHLRNKNGCHVVELLFLRYISDWL<br>DPGRCY RVTWFTSWSPCYDCARHVAEFLRGNPNLSLRIFARLYFCEDRKAEPGLRRLHRAGVQIIMTFKDYFYCWNTFVE<br>NHERTFKAWEGLHENSRLRQLRILLPLVEVDDLDRDAFRTLGL                                                                                                                                                                                                                                                                                                                                                                                                      |
| BtAID     | <i>Bos taurus</i>               | MDSLLKQRQFLYQFKNVRWAKGRHETLYCYVVKRRDSPTSFLDFGHLRNKAGCHVVELLFLRYISDWL<br>DPGRCY RVTWFTSWSPCYDCARHVAEFLRGNPNLSLRIFARLYFCEDRKAEPGLRRLHRAGVQIIMTFKDYFYCWNTFV<br>ENHERTFKAWEGLHENSRLRQLRILLPLVEVDDLDRDAFRTLGL                                                                                                                                                                                                                                                                                                                                                                                                       |
| mAID      | <i>Mus musculus</i>             | MDSLLMNRKFLYQFKNVRWAKGRRETYLYCYVVKRRDSATSFLDFGHLRNKNGCHVVELLFLRYISDWL<br>DPGRCY RVTWFTSWSPCYDCARHVAEFLRGNPNLSLRIFARLYFCEDRKAEPGLRRLHRAGVQIIMTFKDYFYCWNTFVE<br>NHERTFKAWEGLHENSRLRQLRILLPLVEVDDLDRDAFRTLGL                                                                                                                                                                                                                                                                                                                                                                                                      |
| PmCDA1    | <i>Petromyzon marinus</i>       | MAGYECVRVSEKLDFTFEFQFENLHYATERHRTYVIFDVKQPSAGGRSRLWGYIINPNVCHAEILM<br>SMIDRHL ESNPGVYAMTWYMSWSPCANCSSKLNPLKLNLEEQGHTLTMHFSRIYDRDREGDHRGLRGLKHVNS<br>SFRMGV YGRAEVKECLAIEVEASRRTLWLDTTESMAAKMRRKLFCLIVRCAGMRESGIPLHLFTLQTP<br>LLSGRVVWVRV                                                                                                                                                                                                                                                                                                                                                                       |
| PmCDA2    | <i>Petromyzon marinus</i>       | MELREVVDALASCVRHEPLSRVAFRCFAAPSQKPRGTVILFYVEGAGRGVTTGGHAVNPNKQTSI<br>HAEVLLSAV RAALLRRRCEDEGEEATRGTCLHCYSTYSPCRDCEYIEFGASTGVRVVIHCCRLYELDVNRRR<br>SEAEVLRSLRGL RDFRLMGRDAIALLGGRLANTADGESGASGNAWVETNVEPLVDMTGFGEDELHAQV<br>QRNKQIREAYANYA SAVSLMLGELHVDPKFPLAEFLAQTSVEPSGTPRETRGRPRGASSRGP<br>EIGRQRPADFERALGAYGLFLHPRIVSRE ADREEIKRDLIVVMRKHNYQGP                                                                                                                                                                                                                                                             |
| PmCDA5    | <i>Petromyzon marinus</i>       | MAGDENVRVSEKLDFTFEFQFENLHYATERHRTYVIFDVKQPSAGGRSRLWGYIINPNVCHAEILM<br>SMIDRHL ESNPGVYAMTWYMSWSPCANCSSKLNPLKLNLEEQGHTLMMHFSRIYDRDREGDHRGLRGLKHVNS<br>SFRMGV YGRAEVKECLAIEVEASRRTLWLDTTESMAAKMRRKLFCLIVRCAGMRESGMPLHLFT                                                                                                                                                                                                                                                                                                                                                                                          |
| yCD       | <i>Saccharomyces cerevisiae</i> | MVTGGMASKWDQKGMIDIAEEAALGYKEGGVPIGGCLINNKDGSVLRGHNMRQKGSATLHGEISTLE<br>NCGRL EGKVKYKDTLTYTLLSPDCMCTGAIIMYGIPIRCVGENVNFKSKGEKYLQTRGHEVVVDDER<br>CKKIMKQFIDERPQD WFEIDIGE                                                                                                                                                                                                                                                                                                                                                                                                                                        |
| F7B644    | tr F7B644 F7B644_HORSE          | MPRGRARERQRNPMKLDAAEFHFHFLNMEFYVDRNCSYLCYQVEGRLSGSPVLSQEGVFPNEVCGKTRR<br>HAEFLCFLDWRGRSLPDEYYCVTFWISWSPSCNCAREVAEFLKRHRNVELSIFAARLYYCRDHEQGLQSLC<br>NRGAQLAVM LRKDFTYCWDNFVHNSGREFSPWENIDANSDLLARKLEDLLKNPMEKLRKTFFSHF<br>RNLKFAKGRKCSYLCYRVEGR LSGSPGLSEQGVFLNEVCDENCRHAELCFLHWFGRGLSPH<br>ADYRVTWVWISWSPSCNCAREVAEFLKQHRNVELHIS AARLYYWQRNKPLRNLRS<br>SQAQLAIMFFWDFRDCWDNFVHNSGRHFIPWKKINVNSRLLATKLEDLLKNPLEK<br>LH PNTFSHFHCNLEFAYDRKYSYLCYQVEGRLSGSPGLSEQGVFLNEVCGKTRCHAELCF<br>LWDFRVRSLPDEYYRVTWFI SWSPCFYCAREVAEFLKQYRNVKLSIFAARLYYCRDHAQGLRSLC<br>SSQAQLAIMFFWDFRYCWDNFVHNSGREFRP WKKINVNSRLLATKLEDILK |
| D1LZA1    | tr D1LZA1 D1LZA1_PANTI          | MEPWRPSRPNMMDRIDPKTRFQFPNLRYASGRKLCYCFQVERDYFYNDSDWGVFRNEVHPWAP<br>CHAEQCFL SWFRDQYPRDEYVNTWFLSWSPCTCAEEVVEFLEEYRNLTLISFTSRLYYF<br>WHPNYQEGCLKLDAGVQLDIM SCDEFYCWDFVYHKGMRFRQRNLLKDYDFAAKLQEI<br>LSPGQQRKRDRWPFPPRPGAQVDP<br>RWSVQEVTEPGI                                                                                                                                                                                                                                                                                                                                                                      |



|                       |                                         |                                                                                                                                                                                                                                                                                                                                                                                                                                                                                   |
|-----------------------|-----------------------------------------|-----------------------------------------------------------------------------------------------------------------------------------------------------------------------------------------------------------------------------------------------------------------------------------------------------------------------------------------------------------------------------------------------------------------------------------------------------------------------------------|
|                       |                                         | NTRRHPLHLLVSFLPRPTMNLQEDIFYRQFGNQHRVPKPYRRKTYLCYQLKLEPGTLIDKDLRNNKKRHAEICFI<br>DKIKSLTRDTSQRFEIICYITWSPCPFCAEELVAFVKDNPHLSLRIFASRLYVHWRWKYQQGLRHLHASGIPVAVMSLP<br>EFEDCWRNFVDHQDRFLQFWRNLQDQYSESIKRRLGKILTPLNDRNDFRNKLE                                                                                                                                                                                                                                                           |
| A0A3Q0DM17            | tr A0A3Q0DM17 <br>A0A3Q0DM17_TAR<br>RSY | MPMKRMYSNIFYDFHFNQRLSSGQNAWLCFKVERVENCMLVPLETGVFGNQVSGCCGKTERPVEPTSLTRSVLV<br>SPNPGTELRAQQPSRKGHLGKGCVEYSPGLALVMLGYGASTYCPDSSMYCPCETCHHPMFCFLYWFKETSHEEQ<br>YQITWYVSWSPCVNCAEEVAEFLSVHPKVNLTIAARLYCYQLNHRQGLRRLCKEGACVKIMNYEFDHCWENFV<br>YNNYKSFKPWVKLQDNIELLATELDKILRIPMERMPQKFRFHFQNLIAKDRNTTWLCEVKNVRKKHPPDLLERGI<br>FQKQVTPRINCHAEMLCFLSWFLENMLLHGKRYQVTWYISWSPCSICAEVAEFLSAHPKVSILTIAARLYYFVWPGY<br>RQGLRRLVEEGARVEIMNYEFDYCWENFVSINNEFPQWEGLEHEKYGYLVTKLNNILG               |
| A0A3Q0DNJ5            | tr A0A3Q0DNJ5 A<br>0A3Q0DNJ5_TAR<br>SY  | MEDNPEPRRQMQDDQTFIFNFNDPVSVRGRHQTFCLCYEVEHLDDDTWVPQDKYGLFHLNQPQSRSNAYCAYH<br>AELCFLELVSSWQLDPAQRYRVTCFISWSPSCSAQEVAFLKKNRHVTLRILAARIYDYQGYEDGLRTLQGVGVDI<br>TVMTSAEFGHCWNTFVDHQGSPFPQWEGLDQHSQVIWQRMQDILQVIPAKYLMEKVYTVTVDILFKGRVPGPR<br>YLMDQNTFTRNFNNLSVSGRRQTLCEYVERLGGDIWVPLDQLRGFLLSQARDVLYNYQGRHAEPCLDLVSSWQ<br>LDPAQHRYRVTFWISWSPCTSCAQVAFAFLRENHRVTLRILAARIYDYHQGYEGLRTLQRTGAHIDIMTFKEFGHCW<br>NTFVNHNKGSFPKSWTGLDQHSQALRKLQDILHTMASSLWDQSEPKKPIPSQEVTLPEPIPSSHGNRFRLVKRP |
| G5AYU5                | tr G5AYU5 G5AY<br>U5_HETGA              | FCFLSCVHRKPIERIKAFRFYRNLRCAYGRNKTFLCYEVKREDRDNKVLHKGVLNQEVPYMPHLAELRFLSWFHD<br>TLLCPLGSYQVTLVYVSWSPCECAEELTFLAGHRNVTMTIYVAQLYYCNWSPNREGLKILIAEDARLRVMFYDEFY<br>CWRNFVKNDYNNFDPWSSLDENSRYHNRILQNLKLGWGRPHRVGPEGEQATPGSGGGHCISVFLRRREMTLK<br>EETFRVQFNNAKPKPYRRRVTYLCYQLQEQANGDPLTKGCLRTKKGYHAESRFKRICSMDLGQDQSYQVTCFLT<br>WSPCHCAQELVSKRAHPHLRLQIFARLFFHWKRSYQEGQLRCAQVPAVAVMGHPEFAYCWDNFVDHQGPFFE<br>PPWAKLEYSSCLKRRLQQLRSWGVDDLTDNDFRNQLQGP                                      |
| A0A2Y9QMV5            | tr A0A2Y9QMV5 <br>A0A2Y9QMV5_TRI<br>MA  | MLSSPQTGTRKPMKTLAPDEFSEFNENLRLAHGRNTTFLCFQVETKAPPSLNSPDGIFQNDQHCPSHHHAEMVF<br>LWFQKRLSPAQHYEVTWYMSWSPSCRAVQVAKFLKSNSTVNSIFVARLYPRELETKDGLHSLWQAGAQQVQI<br>MFFQDFKYCWENFVNNEGKPFQWKNLDENSKDWDTELKDIHRNTDILLTEEMFYSQFYNREKSSIPRKYTYCYQ<br>LNEPQPVKRLHYKGYHAVTRFDIGIVSMNLDPARSYDITCYFTWSPCNRYARKLVSFIEDYPNLRKLVTSRLYFH<br>WCWNTMQGLQHLQNSRVTVAVMTFRDFEYCWKNFVDNQKPFEPWEKLDLYSQSTERRLRRLKPLTPDVLNED<br>FGNLHL                                                                         |
| H0XHIO                | tr H0XHIO H0XHIO<br>_OTOGA              | LSCAFRDPMNRMYPKTCFQNFKEPCPSNQNSWLCFEVETKNSAVFFHGRGVFRNQPPAPPRAPTSVLLSQGPVKT<br>PCHAEFCFLTWIQGLVPPDHHYHVTWYVSRGPCANCANLIVHFLAMHRRVTLTIFAHLNFFWESDFQGLLRMD<br>QEGVQLHIMGYEEFEYCWDFVYVNRKQFVPWNGLNENYEFMVSTLEDILRSPDRIRKQDFSIHFRNSLWLDKKS<br>TWLCEVFKRTKSPVPLRYGRVFRNQSPKTPCHAEVRFFTWLQDLPDFCCQFTWYLSWSPCADCADLVANFLAKHR<br>NVSLTIFVARLYYRDPPEMHRGLRRMYQEGANVDIMSVIEFEYCWDFVYVNRKQFVPWNGLNENYEFVLPRLQE                                                                               |
| A0A3M0K4Y7            | tr A0A3M0K4Y7 A<br>0A3M0K4Y7_HIRR<br>U  | MYISKALRRHFDPVRYPRETYLLCELQWEGSRRVWIHWIRNVDPDHAEEYFLEEVFEPRNYGFCNITLYLSWSPCCT<br>CCSKIRDFLKRNPVVKIDIRVARLIYPDYAETRSSLRELNLQVRVSIQVMEAAAGLSCIESKNHRISQVERDPKGSSTPLF<br>TLQDHLKLSNMTEVSIQDSVSIQICYQMRILGFQCHIRWKLQPEDFQRNYSNPQIGRVVYLLYEVWRRRGSIWRNW<br>CSNNPEQHAEVNFLENHFHRRPQTCSITWFLSTSPCGKCSRRIEFLKQSPNVTLIYAALFRHHDIRNRQGLRNL<br>MMNGVTIYIMNLEGNPASLCLSDV                                                                                                                      |
| A0A3P4LUZ8            | tr A0A3P4LUZ8 A<br>0A3P4LUZ8_GULG<br>U  | MSFEDYEYCWETFDHKGMYFQSWDLDLRDNDLLAAELKNILRSTMNPLRQEIFYHQFNQPRAPRPHYRRKTYLYCY<br>QLQPHEGPITARVCLQNKKRHAIRFIDNIRALRDRSQTFEITCYLTWSPCPTCAKALAVFVQDHPHISLRLFASRLFI<br>HWCWKYQEGRLRLHRSRIPVAVMRLQEFEDCWRNFVDNQDEPFQWPNKLEQYSESITRRLRRLGHPQNNLEND<br>RNLHI                                                                                                                                                                                                                              |
| G5BPM8                | tr G5BPM8 G5BP<br>M8_HETGA              | RRRIEPWQFEASFDPRQLRRETCLLSEVRWGTSPRAWRGCSLNTARHAEVSMFMDRLTSEGRLRGPVRCISITWFLSW<br>SPCGACAQAIQFLRQHPNLSLVIAARLFWHVDENRQQLRDLVTRGVVRMQVMSDFEFAHCWRNFVNYSPGQE<br>ARWPQVPPVWVWVWYLSLELHCILLNLPCLKISRHHNQLTFFQLILQNCHYQAIPSPVLLASGLHPFVTVW                                                                                                                                                                                                                                             |
| H2M862                | tr H2M862 H2M8<br>62_ORYLA              | MITKLDVLLPKKFIYHYKNMRWARGRHETYLFCVVKRRVGPESLDFDGHRLNRNGCHVELLFLRHLALCPGLW<br>GYGATGQGRVSYISITWFCWSPCANCSFRLAQFLSQTPNLRLRIFVSRLYFCDELSREREGRLMLKKGVGHITVMSY<br>KDYFYCWQTFVARKQSKFKPVDGLHQNSVLSRKLNRILQPCETEDFRDAFKLLGL                                                                                                                                                                                                                                                             |
| H0Y0C6                | tr H0Y0C6 H0Y0C<br>6_OTOGA              | MYLKTFRHFNNRPLYSRNDTWLCEVKTSSNSPGSFYSGVFRNQPRYCPWHTELCFLTWVRPIVSHHHFYQIT<br>WYMSWSPCANCAWQVATFLATHENSLTNYTVRIYFWRQDYRQGLLRMIIEGTQVYVMSKFEQHCWENFVD<br>HWGTRVWVTCWNRLKKNYEFVTRLSEILSDPKERISPNTFYNQFNNTVPRGRKDTWLCFEVKEKNSNSPGSFHRG<br>VFQNVFSGTSSHARRCPDHHYEVTVWYTSWSPCAHCAWHVNVNLTSNPNVSLTIFAARLYYIYRPEIQGLRRVF<br>QEGAKVHIMSLKEFYCWAKLVYNSGMRFMPWYQFNFNFLPNTTLKGDH                                                                                                               |
| A0A3Q2Z5X6            | tr A0A3Q2Z5X6 A<br>0A3Q2Z5X6_HIPC<br>M  | MDVHFMMFIYHYKNMRWAKGRNETYLCFVVKRRVGPNSLTFDFGHLRNRNGCHVELLFLRYLGRRLSISITWFCS<br>WSPCANCSAALSQFLSRMPNLRIRFVARLYFCDMEDSHEREGLRLQKAGVQVTVMSYKDYCYCWQTFVDRKKS<br>HFKAWEDELHQNSVLSRKLNRILQPCEMDLRDAFKLLGL                                                                                                                                                                                                                                                                               |
| A0A2K6NVA7<br>(RrA3F) | tr A0A2K6NVA7 A<br>0A2K6NVA7_RHIR<br>O  | MKPQIRDHRPNPMEAMYPHIFYHFENLEKAYGRNETWLCFTVEIKQYLPVWPKKGVFRNQVDPETHCHAEKCF<br>SWFCNNTLSPKKNYQVTVWYTSWSPCECAGEVAEFLAHSNVKLTITARLYYFWDTDYQEGRLSLEEGASVEIMD<br>YEDFYCWENFVYDDGEPFKRWKGLKYNFQSLTRRLREILQ                                                                                                                                                                                                                                                                               |
| A0A2K6NY90            | tr A0A2K6NY90 A<br>0A2K6NY90_RHIR<br>O  | MNPHIRNPMEAMYPGTFYHFKNLWEADNRNESWLCFAVEVIKHHSTVSWKRGVFRNQVDPETHCHAEKCF<br>WFCNNTLSPKKNYQVTVWYTSWSPCECAREVAKFLARHSNVMLTITARLYYQYPNYQEGRLRNEEGVPVEIMD<br>YEDFYCWENFVYDDGELTFLWPKGLKYNFQSLTRRLREILQ                                                                                                                                                                                                                                                                                  |
| Q6ICH2                | tr Q6ICH2 Q6ICH<br>2_HUMAN              | MNPQIRNPMEAMYRDTFYDNFENEPILYGRSYTWLCYEVKIKRGRSNLLWDTGVFRGPVLPKRQSNHRQVDPET<br>HCHAEFCFLSWFCDILSPNTNYEVTWYTSWSPCECAGEVAEFLARHSNVNLTITARLYYFWDTDYQEGRLSLE<br>EGASVKIMGYKDFVSCWKNFVYSDDEPFKPKWGLQTNFRLKRLREILQ                                                                                                                                                                                                                                                                       |

|                        |                                 |                                                                                                                                                                                                                                                                                                                                      |
|------------------------|---------------------------------|--------------------------------------------------------------------------------------------------------------------------------------------------------------------------------------------------------------------------------------------------------------------------------------------------------------------------------------|
| G8GPV1                 | tr G8GPV1 G8GPV1_CERNE          | MDGSPASRPGHVMDPGTFSTFNFNKPVWVSGQRETYLCYKVERSHNDTWVLLNQHRGFLRNQAKNRLHGDYGC<br>HAELCFLGEVPSWRDLPTQTYRVTWFWISWSPCFSGGCAEQVRAFQENTHVRILRIFAARIYDYDFLYQEALRTLDA<br>GAQVSIPTYEEFKHCWDTFVDHQGRPFQPWDGLDEHSQALSGLRQAILQNGN                                                                                                                   |
| Q1WBT6                 | tr Q1WBT6 Q1WBT6_SYMSY          | MALLTAKTFRLOFNKRRVTKPYPRKALLCYLTPQNGSTPTRGYFKNKKRHAERFINKIKSMGLDETQCYQVTC<br>YLTWSPCPSCAWELVDFIKAHDHLNLGIFASRLYYHWCRRHQEQGLRLLCGSQVPVEVMGFPEFADCWENFVDHEE<br>PLSFNPSEMLEELDKNRAIKRRELEKIK                                                                                                                                            |
| A0A3B4CS14             | tr A0A3B4CS14 A0A3B4CS14_PYGN A | MDNTNRRKFIYHYKNVRWARGRHETYLCFVVKRNSPDSLSDFGHLRNRNGCHVELLFLRYEVLCPLGWGSGVD<br>GVRVSYAVTWFCWSWSPSCNAQRLTNFLSQTPNLRIRIFARLYFCDEEDSLERGLRHLQRAGVQITVMYTKDFFY<br>CWQTFVASRERCFKAWEGLRQNSVLSRKLNRILQVFIPTVISPLITTHLQGSWAGG                                                                                                                 |
| A0A087XZ14             | tr A0A087XZ14 A0A087XZ14_POEFO  | RKVSYSVTWFCWSWSPCANCSIRLAQLHQTPNLRIRIFVSRLYFCDEDSREREGRLILKAGVHITVMSYKDYFYCW<br>QTFVAKSQSKFKPWDGLHQNYIRLSRKLNRILQPALDIKFIYHYKNLRWARGRCETYLCFVVKLHLFMFVIVGRN<br>RLFDLNVTMNNKSLYLIPLHLQLLFLRHLGALCPGLWGYGVTGERKVSYSVTWFCWSWSPCANCSIRLAQLHQTPNL<br>RLRIFVSRLYFCDEDSREREGRLILKAGVHITVMSYKDYFYCWQTFVAKSQSKFKPWDGLHQNYIRLSRKLNRILQV<br>QFF |
| A0A341AEK4             | tr A0A341AEK4 A0A341AEK4_9CET A | MASDRGPSAGDATSRRIEPEFEVSDPRELCKETRLLYEIKWGRSQHVWRHSGKNTTNHVECNFIEKFTSERPFH<br>RSVSCCITWFLSWSPCWECSKAIREFLNQHPRTVFIYVARLFQHMDPQNRQGLRDLIHSVGTIQTIMGPTEYDCW<br>RNFVNYPPGKEAHWPRYPPPLMKLYALELHCILVP                                                                                                                                     |
| E2D879                 | tr E2D879 E2D879_MUSMI          | RNLISRETFNFNENLICYAKGRKNTFLCYEVRKDCDPSVLSCHGVFKNGSIIHAEICFLYWFHDKVLKVLTPREFKV<br>TWYMSWSPCFECAEQVRFVFLATHHNLNLTFSSRLYNVSDPDTQQKLCRLVQEGAQVAVMDLSEFKKCKWEKFDVN<br>DGQQFRPWKRLRTNFRYQNSKLQEIL                                                                                                                                          |
| A0A2K5RDN6             | tr A0A2K5RDN6 A0A2K5RDN6_CEBCA  | MWEAQSPGLSREWGSVAISPEDPGPLHIGRFLSACFRHPMNAMYGFIFNFHFRNLKAYGRNETWLCFTVEGIMN<br>RSTVSWKSGVFRNQVSDPFCHAEMCSVFRHNMLSPKDYEVTVYASWSPCECAGQVAEFLARHGNVRLTI<br>FTAHLIYFVWNPFRQGLRRLSQEGASVLIMGYEDFEYCWDNFVYNDGQPPFKPWKRLQDNLISLYITLQEILQ                                                                                                     |
| A0A2K5RDN7             | tr A0A2K5RDN7 A0A2K5RDN7_CEBCA  | MEASPASRPRPLMGPRFTFTENFTNNEVFGRHQTYLCYEVKCGQPDGTRDLMTEQRDFLCNQARNLLSGFDGRH<br>AERCFLDRVPSWRDLPAQTYRVTFCISWSPCFSCAREVAEFLQENPHVNLRIFAARIYDCRPRYEEGLQMLQNAQAQ<br>YSIMTSEEFHRCWDTFVDHQGHPPFQWPEGLDEHSQALSRRLLQAILQGNRWMILSL                                                                                                             |
| A0A1C9CJ69             | tr A0A1C9CJ69 A0A1C9CJ69_CERAL  | NPMKAMDPHIFYHFKNLKAYGRNETWLCFAVEIQRSTVPWRTGVFRNQVDPESHCHAERCFLSWFCEDILSP<br>NTDYRVTWYTSWSPCLDCAGEVAEFLARHSNVLELAIFAARLYYFWDTHYQQGLRSLSEKASVEIMGYEDFKYCRE<br>NFVCDGKPFKPKWGLKTNFRFLKRRLEQEIL                                                                                                                                          |
| A0A2R2Z4D2             | tr A0A2R2Z4D2 A0A2R2Z4D2_PTEAL  | MHLQVWRKVTEAWREGYTLKPSWRNPMERLYHDYFYFHFYFNLPKPHRNGCYCYQVEGTTKHSRMPLLRGVFE<br>NQESLDMMLSPGKRYRVTWYISWSPCFACVDEVIKFLREHTNVELIIFAARLYHSDILQYRQGLRKLHDAGVHVAIM<br>SYEFKHCLNDFVHQGRSFCPWNDLNKSNKLSNTLEDILRNQED                                                                                                                            |
| B7T161                 | tr B7T161 B7T161_SHEEP          | MTEGWAGSGLPGRGDCVWTPQTRNTMNLRETLFKQFGNQPRVPPYRRKTYLCYQLKELDDLMLDKGCFRN<br>KKQRHAEIRFIDKINLNLNPSQYKIIYITWSPCPNCASELVDFITRNDHLNLQIFASRLYFHWIKPFCRGLHLQKQA<br>GISVAVMTHTEFEDCWEQFVDNQLRPFQPWDKLEQYSASIRRLQRILTAPT                                                                                                                       |
| A0A2R2X2G4             | tr A0A2R2X2G4 A0A2R2X2G4_PTEAL  | MAGLGQACEGCCQMPEISYPMGRDPKTFSEFKNLPYAYGRKSSYLQFVEREQHSSPVPDVGWVFNKQFCGT<br>EPYHAELCFLNWFRAEKLSPEHYDVTWFLSWSPCSTCAEEIAIFLSNHKNVRLNIFVSRYYFWKPAFRQGLQELDHL<br>GVQLDAMSFDEFKCYWENFVDNQMPFRCCWKKVHQNYKSVLRKLEILRRR                                                                                                                       |
| G1Q1M4                 | tr G1Q1M4 G1Q1M4_MYOLU          | YAEISFLDLFQSWNLDRGRQYRLTWYMSWSPYDCAQKLVFLGENSHVTLRIFAADIHSLCSGYEDGLRKLDRARA<br>QLAIMTRDELQYCVWTFVDNQGPFRPWPNLVEHIKTKKQELKDILGNPMRRMYPKTFNFNFNQNLNSYGRKSTFL<br>CFEVETWEDGSVLDYQNGVFQNLDPGHAELCFIEWFHEKVLFPDEVRCDAQYHVTWYISWSPCFECAEQVAGF<br>LNEHENVDLSISAARLYLCEDEDEQGLQDLVAAGAKVAMMAPEDFEYCWDNFVYNRGWPFYTWKHVRRNYGRL<br>QEKLEILW     |
| A0A1S3AN78             | tr A0A1S3AN78 A0A1S3AN78_ERIEU  | RRIEPEWFEFFDPRQFRPETCLLYEVRWSSRNARWRSTARNTTRHAEVNFLERFAAERHFDKPVSCSITWFLSWSP<br>CWECQAIGAFLSQHPQVTLAIHVTRLFHHEDEQNRQGLRDLARGVTLQVMGDSEYAHWCWRTFVNSPPGAEGH<br>YPRYPSDFTRLYALELHCLLGLPPCLEILRRYQNFQFTLFRVLPQNCHYQMIPHLNFFVRRHYFF                                                                                                       |
| A0A151P7C9 (AmAPOBEC1) | tr A0A151P7C9 A0A151P7C9_ALLMI  | MADSEKMRGQYISRDTEFKNYKPIDGTEAHLLEIKWKGYPKPLHWCQNRQNRMIHAEDYFMNIFKAKKHP<br>VHCYVTWYLSWSPCADCASKIVKFLERPYLKTIIYAQLYYHTEENRGLRLLRSKVIIRVMDISDYNVCWKVFS<br>NQNGNEDYWPLQFDPVWKENYSRLLDIFWESKCRSPNPW                                                                                                                                       |
| Q4VUI3                 | tr Q4VUI3 Q4VUI3_XENLA          | MTMDSMLLKRNFYHYKNLRWARGRHETYLCYIVKRRYSSVSCALDFGYLRNRNGCHAEMFLRYSIWSVGHDPH<br>RNYRVTWSSWSPCYDCAKRTLEFLKGHPNFSRLRIFASRLYFCEERNAEPEGLRKLQKAGVRLSVMSYKDYFYCWNT<br>FVETRESGFEAWDGLHENSRLARKLRILQPPYDMEDLREVFVLLGL                                                                                                                         |
| E2RL86                 | tr E2RL86 E2RL86_CANLF          | MNPLQEETFYQQFSNQRVPKPTYQRRTYLCYQLKPHGEGSIVAKVCLQNEQKRHAEICFIDDIKSRQLDPSQKFEITCY<br>VTWSPCPTCAKLIAFVNDHPHISLRLFASRLYFHWQRKYKRELRLHLQKSGIPLAVMSYLEFKDCWEKFDVHKGRPF<br>QPWNKLLQYSEISGRRLQRILQPLNLENDFRNRL                                                                                                                               |
| G1LWB0                 | tr G1LWB0 G1LWB0_AILME          | SSAAPASIHLLDEDTFTENFRNDDWPSRITYLCYKVEGPDQGSVPLGQDKGILHNKPAQGPESRHAECYLLEQIS<br>WNLDPKLYHYGVTFLSWSPCAKCAQKMARFLQENSHVSLKLFASRLYTRERWDEYEGELRKLKAGASIAIMTYRE<br>FEHCWKTFVLHDQEGSCFPWPFLHKSQKFEKLQAILQVGVLLSLPPLPSSPLSSPWPFPAPLRASTG                                                                                                    |
| A0A1U7S7K7             | tr A0A1U7S7K7 A0A1U7S7K7_ALLSI  | MGEHWQYAGSGEYIPDQDFEENFDPSVLLAETHLSELTWGGRPYKHWHYENTEHCHEAIEHLENFSSKNRSTITW<br>YLSWSPCAECSARIADFQENTNVKLNHVARLYLHDEHTRQGLRRLYLMKMKRVITQVMTIPDYTYCWNTFLEDD<br>GEDESDDYGGYAGVHEDEDESDDDYLPHTFAPWIMLYSLELSLQGFAPCLKIIOGNHMSPTQLHVQDQEQKR<br>LLEPANPWGAD                                                                                 |
| A0A2R2X2J8             | tr A0A2R2X2J8 A0A2R2X2J8_PTEVA  | MPRIGNMNLSEKTFNYHFGNQLRVKPKQGRRTYLCYKLLPNETLVKGYFINKKKNHAEIRFINKIRSLNLDQTSY<br>KITCYITWSPSCYAGKLVKSCPHLSLQIFTSRLYYHWLWKNQAGLRYLWKINISVLVMEPEFADCWDFVNH<br>QSRRFKPEWELTQYSNSTERLLRILRINRDLFLAQSSEQDPLNDLVDAIKRFLDAHRPRD                                                                                                               |

|                        |                                 |                                                                                                                                                                                                                                                                                                                                                                                                                                                                                                                                                                                                                             |
|------------------------|---------------------------------|-----------------------------------------------------------------------------------------------------------------------------------------------------------------------------------------------------------------------------------------------------------------------------------------------------------------------------------------------------------------------------------------------------------------------------------------------------------------------------------------------------------------------------------------------------------------------------------------------------------------------------|
| A0A151P6M4             | tr A0A151P6M4 A0A151P6M4_ALLMI  | MAVEEEKLLGTSQGWKIELKDFQENYMPSTWPKVTHLLYEIRWKGKSKVWRNWCNTLTQHAEVNCLENAFGKLQFNPPVPCCHITWFLSWSPCCQCCRRILQFLRAHSHITLVKAAQLFKHMDERNRQGLRDLVQSGVHVQVMDLPDYRYCWRTFVSHPEHEGDFWPWFPLWITFYTLELQHILLQQAHSYNL                                                                                                                                                                                                                                                                                                                                                                                                                           |
| A0A2K6MNR2             | tr A0A2K6MNR2 A0A2K6MNR2_RHIBE  | IWLCTMEIHKQCVTSVWKRGVFRNQVDPETHCHAERCFLSWFWEDTLPSTNTNYQVTWYTSWSPCLDCAGEVAEFLARHSNVKLAIFAARLYYFWDTDYQQGLRSLSEEGTSVEIMGYEDFKYCWENFVYNGDEPFKPKWGLKYNFLFLDSKLQEILE                                                                                                                                                                                                                                                                                                                                                                                                                                                              |
| D3U1S2<br>(SsAPOBEC3B) | tr D3U1S2 D3U1S2_PIG            | MDPQRLRQWPGPGPASRGGYQQRPRIRNPEEWFHELSPRTFSFHRNLRFASGRNRSYICQVEGKNCFFQGFQIQNQVPPDPPCHAELCFLSWFQSWGLSPDEHYVTFWISWSPCCCAAKVAQFLEENRNVSLSAARLYYFWKSESEGLRRLSDLGAQVQIMSFDQFHCWNNFVHNLGMPFPQWKKLHKNYQRLVTELKQILREEPATYGPQAQGVKVRIGSTAAGLRHSHSTRSEAHLRPNHSSRQRHRLNPPREARARTCVLVDASWICYR                                                                                                                                                                                                                                                                                                                                            |
| F1CGT0                 | tr F1CGT0 F1CGT0_ANOCA          | KAAILLNLFFRWQMEPEAFQRNFDPREFPPECTLLLYEIHWDNNTSRNWCTNKPGLHAEENFLQIFNEKIDIKQDTPCSITWFLSWSPCYPCSAQIHKFLEAHPNVLSLEIKARLYMHQIDCNKEGLRNLGRNRVSIMNLPDYRHCWTTFFVPRGANEDYWPQDFLPAITNYSRELSILQD                                                                                                                                                                                                                                                                                                                                                                                                                                       |
| C7AGG3                 | tr C7AGG3 C7AGG3_HORSE          | MDPQAPTQRGGGLQAYQGGDYVQAPNGNTQHLLSEDFVKKQFGNQRRVTKPYRRKTYVYCYQLKLLRGPTIAKGYFRNKKRHAERFIDKINSLGLDQDQSEYITCYVTWSPCATCACKLIKFRKFNLSLRFVSRLYYHWFRRQNGQLRQLWASSIPVVMGYQEFADWCENFADNRGNPFQSWEKLTEYSKGIKRRQLKILEPLNLNGLEDAMGNLKLGSVDLG                                                                                                                                                                                                                                                                                                                                                                                             |
| A0A250YMK7             | tr A0A250YMK7 A0A250YMK7_CASCN  | MSLLKEDIFLYQFNNQQVQKPYFRRRTLYCYLQEQPNGRSQWPAKGLQNKKGHHAERIFIKRIHSMGLEQDQDYQITCYITWSPCLACALAEKLNHFRLTLRIFASRLYFHWIRKFKQMGQLHYLKSGLVAVMSLPEFTDCWEKFNVHRQVFFTPWDKLEEHSRSIQRLRLQLQSWDVEDLTDFFRNLRL                                                                                                                                                                                                                                                                                                                                                                                                                              |
| B7T160                 | tr B7T160 B7T160_SHEEP          | MPWISDHVARLDPETFFYQFHNLLYAYGRNCSYICRYRVKTKWHRSPVSFDWGVFHNQVYAGTHCHSERRFLSWFC AKKLRPDECYHITWFMWSWSPCMKCAELVAGFLGMYQNVLSIFARTLYYFQKPYQRKGLLRSLDQGCACVDIMSYQEFKYCWKKFVYSQRRPFRPWKKLKRNYQLLAAELEDILG                                                                                                                                                                                                                                                                                                                                                                                                                            |
| A0A182D0J1             | tr A0A182D0J1 A0A182D0J1_BLAVID | MTNPESPPQAPCDFNEDALLNREPLRGSPIKFVSPVDYDPLVAFALAGPVGVDIDYIQSISDCLKSFDYSTE FIRITEIMQDIKCSKTIDCTDMLKEYQSKIEYANELLRRAYRAKDLAALTISAISKREIKERDEATNKSNIQPSRRKLAWVVRQLKTPPEVRLLRVAVYQKQFVLSVSISSPQRREDFLISKIKSRGTDIDNNTSSEGAQRRIERDSKEDNEYGQNLSTGTFCLGDIFVDSNNKESAIVSIDRFLNAFFGSNEISPTRDEYGMYLAKTASLRSCDLSRQVGAIFSKTGEIISLGSNEVPKAGGGTYWTGDNADSRDIRLGHDPNEINKVEIFAISRLLEDKLLSNDLLNKDAASIVTILLSKNEGKRYKDLRVMDDIEFGRIHAE MSAICDAARNGRAIIGATLCTFFPCHLCAKHIVASGIGRIVYLEPYPKSYAKKLHSDSIQVEDHSDSEKVSFEPIGSPSRYRELFEGRRRKDPFGEALKWKNDPRKVIDVVPVPHFEAEKLVIAQLGLKLVSGTG                                                                      |
| A0A2D6EXD2             | tr A0A2D6EXD2 A0A2D6EXD2_9ARCH  | MIIGLVGTIGAGKQTIIDYLQEKYGYNALSCSDVLEILKQKQKPVTRDNLREIGNKTRREEGNGAIAKILLEKLRNNWKANYIVDSLRLHPDESVLRTSPLFHLVAVDADLRIRFERVKARKREEPTTLPFAVERDQKEMFGTGNEQRIRETMELEADELVNNGTVEELKQRIDDLNLVSDERLRPSWDDYFMRRLARLAAQRSNCMRSRKGAIITKDRRVIATGYNGTPRGVKNCEGGCERCNSAVAKGTAISECLLHGEENAIIAAGRVRSEGATITYSFLPCLWCTKMIQAGLKEVVFSEVYDLHEASIKLFETSGVLIRRLK                                                                                                                                                                                                                                                                                      |
| F7YVM7                 | tr F7YVM7 F7YVM7_9THEM          | MNEFKYMSLAKLAKKGYKTSNPMMVAVIVKDGKILATGYHKKAGQPHAEINALSKLNFQAQNCEMYVTLEPCS HYGRTPPCADAIIRSGIRKVIATLDPNPLVNGKGVLEKLNAGIEVVCGVLEEKAKKLEKFFKYITTKIPFVALKIAQTL DGKIALKNGESKWITSEKSREYVHKLMEYDAVLTGIGTILKDDPQLNVRLKVKYQPLRIILDSKLIPLSAKVLDEPSKVIITLALADKEKLEELRSKGVVEIITNEKNGIVDLESALKILGEKITSVMVEAGPTLLTSFLKESLFDKIYLFIAPIKIFGADSKSVFSELGLEDISKQKFSLESVKKIGEDLLELYPKQLKLEE                                                                                                                                                                                                                                                       |
| A0A3M6UNF1             | tr A0A3M6UNF1 A0A3M6UNF1_9CNID  | MEEKSELENELMRSTSPKPSVNGSKGNECEQRETRITKENLYMVLALWMEFPVVEQTSSAKRLNKVGVVFLPTDRVLAADCSRDRDGHGVARVMVNHCGKLEGCKVFSRKPCLCAKLLVQSKVSRVFLPIEPESENKGEIARADNLFKNSSVSGQSVFVPCVEQKVLKLEDKLPEIITPDDISECRDNLKCKGWSAEWFARAQASLPWPCFEGKMKSQVDNDFKSLIKWIAVVKAPMDKGVAFPKVLTSDSRVVPDCAADNFPDSTAYHMMIFAKMLARQTDQPKTGAVGAVIVRGKVPDIVSLGWNGFSPKALYGEFPRASDDRALQKFPYVIAHQNALMVRNVKDLTDGILFVTKPPCDECAPMIKLSGVKTIVIGEKIEKSRGGELSYNLIKEYIKEGIMTCYQMEATKTKAKRLASDPETRKRKLSKSSNSNDV                                                                                                                                                                      |
| A0A2G3K826             | tr A0A2G3K826 A0A2G3K826_9BURK  | MTKIIDDVNTAAAVLDQATAAANQTTFAVGGVMVNNQTVGEVIAIHNNVIPLSNVVSFTFDPTAHERQLVYWYYANKEALKLPEPNQITVITSLDPCAMCTGALLTAGFNVGVVAIDTYAGINCAQNFQFATLPANLRTKAQKNFGYYASGAANFKPLTRSYVGGPSVAFKNGVVTANLDRDCTVFTQSVDTVNRNTSNTGLAPSQMSNPAELPSNSAILQAYRAIYKKAFTIKIDNPRLPDAQILTELKAVLADAPNARNAVAFIDPFGNLVLCMADAFNTSPVHAAFMNVVTQYAKTRWDLMNKYAQASTTNDPALYLTHPKYGTFFVYLYAPDPDDISITMSLGAYGSTMEGPIPNMFPNSLQFYPPRNGAQFSELPVNVNELPPFYTQNVNLSLMQVPGVTQAPT                                                                                                                                                                                                   |
| K1ZCJ4                 | tr K1ZCJ4 K1ZCJ4_9BACT          | MSSRAKKNRSTNLKKSIGQKSIENKPTDQKQDQVLVAVYVPIHEGYRRFRHFAVKELWLISQELSHELRSLOKDIRALKASETKKLLQWGWQFQKIKLLTPSSLAILQKTTTQLVFPDEEISHHLVEKYFAQNRVLFASFFLRWDKSSLKKHDLQEYSEISNKEFDQMMIAIAQQEADKSDDWWRQVGGGLIKDETILLAHNQHTPEAEAYFAGDPRADFHQGEYLKISTAIHAEAYLIAQAARQGISLEGADLYVTTFPCPVCAKQVAYSIGIKRVFFREGYSLDGETILKANGVKLIRVTV                                                                                                                                                                                                                                                                                                             |
| A0A1G3PNQ8             | tr A0A1G3PNQ8 A0A1G3PNQ8_9SPIR  | MRLDPLLVLGLTGPMSGAGCTRFARDISKMEPGKVIKKQGLDQVAHEISELSKASEIRLQCSINGKNSLAELKRLNRLNAKLAERACLHVIKSSLEPLFISLNTIVIKIADVDSITAPEFAEWAKNHAKVADLLKWLRTQWESELTLYETWGDAGRFSDQDELEKMDAMFAEFERIGDEILKEDFETYFGKRNDFSIRMFSENIRLSGNPFRPAENGGGGKGYDEPSMVMIARETDRYIRFYRTRSDQKRSHFFIIDEIKNPREAEYFRARHQNFVLSIFSSSEIRASRMRRGLGDAGVSDADFQHLFRELDSDRWGADDFDAHGLHRQNIYRCFNLADIAINNDVEDERFSEVLFNKFIRYALMLSPGCVQPTPQETYMHLAYSLSLRSTCISRQVGAVITDLEDRILSLGWNEVPEQGIGGLKVKKDYTDKENPLFEMEIVDNDVITAEADLAVWDDDESICVKDILSRIEIKTKLSVSLTPEERADVLKALRIKRELSRSLHAEENAILQVSRGGVGLKDGTYVTTFPCELCSKKIYQVGISKIYYTEPYNPISSEKVLKDGIRNIKILQFEGVKSYSYFKLFPKGFDDKDAQMLEGRGI |

|            |                                |                                                                                                                                                                                                                                                                                                                                                                                                                                                                                                                                   |
|------------|--------------------------------|-----------------------------------------------------------------------------------------------------------------------------------------------------------------------------------------------------------------------------------------------------------------------------------------------------------------------------------------------------------------------------------------------------------------------------------------------------------------------------------------------------------------------------------|
| A0A1G0PGF4 | tr A0A1G0PGF4 A0A1G0PGF4_9BACT | MKHNNQLRKEIEKLLGQNSIIKNDLKKLQKEYKIETDELLISFLPYAAEFKPVISKYKVGAVVLGKSGNIYFGSNMEFEAGALSATVHAEQSAVNNAWLNGETGINKIAVTAAPCGYCRQFLNELTTAKQLHLVLLKDKNLEAAKVKLTLELPEAFGPRDLEIEGGLMKVENHKLKIENINDELINALEAANKSYAPYSKNSYGSVLSQSDGTFISGRYSENAAYNPSLLPFQSALAFMNMNTKKGSSNNKIVDAVLVEAVSNISQKDAAGTLLNSISKTKLRYKIKN                                                                                                                                                                                                                                  |
| A0A0P4WGY5 | tr A0A0P4WGY5 A0A0P4WGY5_9EUC  | MEENSATSQPKASRTKQGGNDLSTDMNSLVGETKRTDFLPWDDYFMAVAFLSAMRSKDPSSQVGCIVNADKKIVGIGYNGMPIGCSDDDELWNKESLDPLQTKYMYVCHAEMNAIMNKNSSDLAGCCVYVAFPCNECAKLVIAQAGIREVVFFSDKHQQPETVASKMMLMAGVAYRQYTPSQSKIELNLSLKEQEKEPTADITQSSERDQNSKRKYLSWEEYFMAHLSALRSKDPITQVGCIVNSKKIVGIGYNGMPLGCNDDLMPWGNSSSNKLETKYMYVCHAGVNAIMNKNSCDVSQCTLYVAFPCNECAKVIQAGIKITIIYASDTNKKDQASILASKKMLDMAGIKYRADNLSQRKIVDFKIDWNSRFMNDHQNDPTCL                                                                                                                                  |
| A0A3D8IG27 | tr A0A3D8IG27 A0A3D8IG27_9HELI | MRKNILYFILTLFLLSGLYATSLPEDNVVSGVIYEKIDTVSAEVDHIYPLMLALAIYKDWQEKMNMLNKQGHNIGLIVDENNMPVFWVRNSVHATHNGTQHGEVRLVSNLLNCEGFNKYLDKYTLTYTLEPCIMCAGMLSMVQPKVYVAQKDLSCGNTQEIISTAKYPRRYKAFVVENGYKDKLEECFEQYKICKNDSITDFLVNDSAKEIFRKAASNDLQDYKVKFKENRRVVKVAQEFLQNIQTNDLVLQCPKNNM                                                                                                                                                                                                                                                                |
| A0A351C8C4 | tr A0A351C8C4 A0A351C8C4_9BACT | MNELTKQSEHLRNEALRIATRSYVPTGQQEQEVILLLENGDLIPGVRVENASFLTLIPALQNALSTMYALQRTDISMIVSSIPFTDSDLAYTGGMAEIAWEMVYGASLLLVAGHAIPEAGTFIDPARGENLDDVSREAAALNAFIPESDFVGSIAQTSDDVVVDGCVNEHSDWSKIIAERNVLSSTARVGLGQITTYVSCPKPEGGTPCGACRQVIVELAPDATVWMDRGNQEPIAMKATKLLPGHFTGNVLKQ                                                                                                                                                                                                                                                                    |
| A0A1G6V2K7 | tr A0A1G6V2K7 A0A1G6V2K7_PEPNI | MPIVRVNEIGARLPEDWEALETAIWQAVVSREDLPDAGELDLTLVDDATIQLNKTHRQLDKSTDLVSPFMYDDRD DLAADVQAGLVPVILGDIMISVPTAERQAQAYGHSFKREMAVLLVHGLLHAGYDHMSAEKSSAMRRAEEAILADVDVPRDTAPSKTAAVLDEADVQALIDAARAARLQAYAPYSGYAVGAALLAADRRCVGNVENASYGATCSAERTALFAAVTAGARDFIALALVTEGDEPAPPCLCRQALAEFSPDLAIYLAGTGETYRTRLSLAALFPEAFSLSTKCV                                                                                                                                                                                                                         |
| F2NP91     | tr F2NP91 F2NP91_MARHT         | MPVMETHALEARFKEALARLCEPGRLLAAVSGGGDSVALLYLLKAAGRDTIVAHLDHALRPSAADAFAVEKLAQRLGFPLETEHVDVRLAHRKRINLEAAAREVRYAFLARVARRWKARCILTAHTLDDNAETVLLQILRAGRGLGIRPLQRRVARPLLEFSRAELRAYLEARGARWLEDPTNRSLELDRNLYRHAVLPRITARFPHALARFSAQQAQADDWALEALSARHLIPDRRWVPAYRALPERAPEALRRRAIRGVLEALGVRPEARLVADVEAALGGRAQTLPGGGVVRQRGTLFIPPTVRFPKVQPPAGLEARPPRGDYLVPYGRKRLVDFLNERGVPRELKRWPVAVGAEVRWVYGLWPEPDED RYMRRALVLAARAARQGEVPIGAVLVRDGAVALAEANAVEASRDATAHAELLARLALRRVGEKVLPGATLYVTFLEPCPMCYGAILEARVARVYGVENLKAGAFVHGLEPRVALEAGRVEGECAKVLKDFARLRPGRDGA |
| A0A316TX77 | tr A0A316TX77 A0A316TX77_9BACT | MINGYTPYSGNQNTCYVKGESGTFYVGVRIENVSYPLTISSVQAAVCSCLANSNDNPVEYTGDDHQPELLQVWADEYDMKPKGGKLPDPSPLKFDPLVPSIDIKELDLVTEKSVTPNSGFPVALLQTEKGYIRGVNIELSSWALGLCAERVAISRALTAGYTQFKSIHIYAPEADFVSPCGACRQVLEVMPPADTELYHGDGTLKSHIVSDLLPFGFTSHKLLK                                                                                                                                                                                                                                                                                                  |
| R6VYG3     | tr R6VYG3 R6VYG3_9FIRM         | MIHKGQTIEKRLILRAFTDDAEAAAFENWMSDPKVTFLRWKTHADISDRKIVNEWANGSADPEFYQWAIVPKDVNEPIGITSVVDNRDALGIFHIGYCYGSKWVHKGITSEAFSAVIHFLFEEVGANRIESQHDPENIHSQDVMKKCGLTFEGTLRQADFNNRGIVDACVYSILQSEWQNNTSVWQRLYNAALTVQNDRVSPFDAGGVAALMTKKGNIYTGICIDTASTLGMCAERNAVANMLTNGESRIDKIVAVMPDGKVGAPCGACREYMMQLDRDSDGDIILLDLETEKTVRLKDLIPDWGWAERFGDTE                                                                                                                                                                                                        |
| A0A3C1HZ18 | tr A0A3C1HZ18 A0A3C1HZ18_9BACI | MGDIMENWNESEPWKRCFLQAWKAYCHGSIPIGAVLVSEGEIFLEGRNRVHELTAPEGQLCDCRIHAEMNVLVQVKTSDEYKLSGATVSTMEPCIQCFGAILSRKINISFAAIDDKLAGATLEDRHGFKSRNLIAGPFSHLGEIQILRTDFLLRIFDSEYADPLIAAHEKDYPIGVALGRHYHRNRLQVAKKETIPFGELFNEFSFIKREAREGYTLGK                                                                                                                                                                                                                                                                                                       |
| A0A1M6KV24 | tr A0A1M6KV24 A0A1M6KV24_9BACT | MEASQQNILLKIEGKGPVAEINFTVTLPEWLVEQVQSGSTVFLTQKEKMRVLELARKNVAQETGGPFAAAVFSLES GELVSAGVNVVVESSCSAHAEVVALSLAQKAVDSDHDLGAAGLPRMVLVSSAEPACMCMGAIPWVGKQVICGARDEDVRSVGFDEGAKPLEWVEDFAERGIEVIRDVREEATEVLWDYRERGGIY                                                                                                                                                                                                                                                                                                                        |
| A0A2U0T9B4 | tr A0A2U0T9B4 A0A2U0T9B4_9RHIZ | METAELISRLLDVIKDIAPVTAAGVARGNKLFGAAILKSDLAIVAEETNNEIENPLWHGEMQAIKRFELPADQRPA TRDCLFLATHEPCSLCSGITWSGDFNYFLFSHQDSRDGFAIPYDIQILKSVMYAVPEPETGTVSPARDLYNRSNDFWT SHGLQDMIAGLARSNREALLARIDDLNALYAELSERYQRDKGGKGIPL                                                                                                                                                                                                                                                                                                                      |
| A0A2K9PN08 | tr A0A2K9PN08 A0A2K9PN08_9FLAO | MSDKKESKIKISKTSEIHELDEIHSLLSYVQKFWENDDRNDRGYNVGVILVDENKNIVDWDINSVNKTENSTQHGE MRLISRYLDKDELYSLKGYMYPTLEPCAMCAGMMTMTNVYRTVNGQMDYFYSKALERLSIDTRECGRYPPYPRV ISEISSISSTRDLAEYKQYTNAGNKPIITFLSTYKAKTIYDDAFNQFINFKCKFPENKTYENAIKFNLSLPESI                                                                                                                                                                                                                                                                                                |
| F4PWM7     | tr F4PWM7 F4PWM7_CAVFA         | MRFSLSLLFVILSVLLAGVLACKDPYNPETVDYVGCASATKANYEVRSDSKVLTADLPADLAVHESRMRHIIDIA RVNKKFVSSYIFPNGLTACIGINTGKPNMIAHEIQNCTEIHGISMITYNYSIYTTGEPSCMCASAILWRSFKTVVWS TYNSDYCKICMSNIPIDSSYIFSRAYGLGIEAPVAIGGVVKAEGDAWFGTYCNRPTSIYIAPKACQDPAKVSPLKFT QTRTTVWVEGDKVVTQWNAIISNPSNSTIVDPPVIVISPSVFKGAPWGISAASEPNTYKLSYKLVLPFGQTF5FGYS VYGLEEVAFTAELA                                                                                                                                                                                              |
| U7QZM1     | tr U7QZM1 U7QZM1_PHOTE         | MNKTRRKLATLIGMSISMSFIAQAGEKKTQVINNLSKQEITEHEKYMREAIKEAIKNPKHPFAGVIVNRNNGEILSR GVNTGRNPNILHGEIQAINHYITQYGNQGWENVALYTTGEPSCMCMASALVWIGIREVIWATSISVIRNSGIRQIDISA HEIAERASSFYNPITLVGGILANETDKFLERKRG                                                                                                                                                                                                                                                                                                                                  |
| A0A081CH48 | tr A0A081CH48 A0A081CH48_PSEA2 | MASRRHLLATQVTGNHRKLSLWHLRGWLSPTYKLVDAVYFLTTNSFYHSLQTPPVQSQITMLLSSITSALAAQASAY REGLHPEFQSGLSINSVPATDRDHWMLANSIAYPPVSHPCPQAPFGTAIVNTTNSNELICAIANRVGSTGDPTQHG EITAIQHCTNVMRKGLSPQEIIAAWKLSLYTNAEPTMCLSAIRWAGFKEVIYGTSGVTISENGRNQIYIPSNLVLE KSYSGHATMLGNILHTEHPFFQHGFNESAPCVGCERTQVGEARVKTCEPVNWNQKLVRLVEYSEDSRVGSEPV AHTPLHLEL                                                                                                                                                                                                       |
| A0A3D3HMU1 | tr A0A3D3HMU1 A0A3D3HMU1_9GAMM | MDYSDAILGAITSIRRNKQPGVNVTDNVTDSSTQYNNDEYWMRRALALAREAGEAGEIPVAVLVKDNQVQVAG GFNQPIRSHDPAHAELTLEAGAVLGNRYRLIDTTLVYVLEPCMMMCAGALVHSRIKRLVFGAAEPTKGAAGSFIDLLT LPRLNHYMEVTGGVLGEECSVLLSDFRRRRRAEKALKRQNSSEGSDSAS                                                                                                                                                                                                                                                                                                                        |

|            |                                  |                                                                                                                                                                                                                                                                                                                                                                                                                                                                                                 |
|------------|----------------------------------|-------------------------------------------------------------------------------------------------------------------------------------------------------------------------------------------------------------------------------------------------------------------------------------------------------------------------------------------------------------------------------------------------------------------------------------------------------------------------------------------------|
| A0A1N5WT13 | tr A0A1N5WT13 A0A1N5WT13_9ACTN   | MLEKIERRLVAAAEAVVRSPTGDAHTVAAAAMDANGDIYSGVNVFHTGGPCAELVIGSAAAANAPPLITIVAVGDGDRGVIAPCGCRQVMDLHPDVFVIVPTGDGQLAAKPVRELLPFGYVARTGSTAPRVVYFHPRHVDITSSGLKTATVRFQDSVQTGPVAVFVDDGESIRRLDAVVEKVESRRDLHTEEDAHHEALPDSALRDAIKTQYPMPLGDGDVVVDVATFRLTAISAPDPDRSSYPVAVSRCNPAGPRADLLVGQS                                                                                                                                                                                                                        |
| X0SAC5     | tr X0SAC5 X0SAC5_9ZZZZ           | MTKDGRVIAHAHDTEVTDQDSTAHAEINAIKASKIYRKDLTGCLISTHEPCPMCTGSIIWSNISKVVYGVJSIRDSIKAGRDMINLSCKEIIKPNAEINIYDGIKKECKLYNNDTRKLVKFRKYEWINIEENLNKRMQWFENNKTMIRKLGKNDLEKAYHLILMKIGIKRSEAPIVKKSEKIFHSHKNYCPSEACIILDLDTREVCKEIYERPTIELIRRLNSKLRFRTRNYDCIRPYSDYCEEIILEK                                                                                                                                                                                                                                       |
| A0A3B8IC10 | tr A0A3B8IC10 A0A3B8IC10_9BACT   | MPSHEDFIHQCLELGEKALLQGNPPVGSVIVWQDQVIGRGIENGRSSGDITQHAELLALQEAVATGQRDKLKEAIIYSTHEPCVMCAYPIRQYKIPTVVYSVAVPELGGHTSSWHLLTTEDEVPKWGKAPKIITGISAEVEALNAAFQDSLKKG                                                                                                                                                                                                                                                                                                                                      |
| A0A2N9P8B9 | tr A0A2N9P8B9 A0A2N9P8B9_9FLAO   | MFIFKLISSPPVSIYVYQDKIQLKLYCFMENIFTDYEFMKKALQEAFQOGEIPVAVIVDNRIARSHNLTEMLNDVTAHAEMQAITASANFLGGYKLDCTLYVLEPCQMCAGALYWSQISKIVYGATDEQRGYRAMGAQLHPKTKVISGIMQNECTHLMKDFKQRRSKTKD                                                                                                                                                                                                                                                                                                                      |
| K1KX30     | tr K1KX30 K1KX30_9BACT           | MVKNPVNNNELYFGKHSEIPMNEEQAYMKMAVLDLRSRGMESGKGGPFGCVIVKDGKVIIGSNSVLETDPTAHAEIVAIRDACRNLGHFQLDGCVEVTSCEPCPMCLGAIYWARPSKVFVANDKRDAAEAGFDDDFIYQELELPYEKRKIPFEQGMQDTAKEVFQEWILKEDKTL                                                                                                                                                                                                                                                                                                                 |
| R4XI84     | tr R4XI84 R4XI84_TAPDE           | MSSEIEPPSTDVHKHAVAEEAADESGAADAFAFMQIALQQAETALLNKEVPVGCVFVHQPTGTVATGANQTNASLNGTLHAEFVAIESILRDHPPSIFRESLDYVTEPCVMCASALRQLQVRKVFYFCGNDRFGGCGSVFSIHS DASKTGDAAYMVESGIFRKEAIMLLRRFYLLQNESAPKPAKSTRVLKEHFDE                                                                                                                                                                                                                                                                                           |
| A0A239CVF7 | tr A0A239CVF7 A0A239CVF7_9DELTA  | MSPASKKHFPSSFLLLTIGLICGTAHAQPQGHADTAAATLANASLKEHEPFIRRCYQLAIDAGKGNHFPFGALLVHKGKIVLEAENTVLTNDFTNHAEMNLIAEAARTLSRQIPEATVYTSAPCAMCTATLAMAGFRIVYGVSHDALNKRFGKKGKSVSCLPFLKTMGMELEFVGPVLEKEGLRVDFWPEKDPHAQMLKQKQARK                                                                                                                                                                                                                                                                                   |
| A0A1Q3NME1 | tr A0A1Q3NME1 A0A1Q3NME1_9BACT   | MTEFNVDWAKLAFSSKRPLNLKATFIAPREISEKRFTQLLKEYLPKGDILLGSKEDYVEGLEGGPQFAMLQKTLQKLIDKVNDAASAHKVYTLRYFQRELPALIEKLTTPRVVGIHGSWHHSFHTLPIYLLSEKIRIPYQLVAAFSDEDEARAYEVATDKKIVRPTLEGSFDDTTLVQLTDEVAKSSYDYGFTGAILAEKVNQVQPVAAAGFNKVVYQTYALLNGASRETNFSPANDMNHYDTHAEMQILVEAAKQGISLKDKTLFVNLMPCCSARTLSQTELSIVYRIDHSGGYAVDLLTKVKGDIRRIVY                                                                                                                                                                        |
| A0A2G6N4N7 | tr A0A2G6N4N7 A0A2G6N4N7_9DELTA  | MKERTVSYSDRHFMAEALMAESALTQGEFPVGCVIADGTAVVARGHRTGTTAGAVNEIDHAEINALRHLGLAGEHLDRTDLTIYSTMEPCMLCFAAIIVLSGINRIVYAYEDVMGGGTGCDLTGLPPLYRDAPLTLVAGVRRRASLNLFRFRFTDPENGYWAGSLLSRYTLNQTKDSHRL                                                                                                                                                                                                                                                                                                            |
| A0A0G0RBB8 | tr A0A0G0RBB8 A0A0G0RBB8_9BACT   | MQSVQYNKLTQLRRALDEAEQVLENSYNYPSHFYVAGCALISEDEQLIAGTNFENAAYSGAICAEAAVLRANAMSI RRFRGIAIARGEDFNTEVTGPGCGSRQVLYEISQVSGCDLQVILATSKKDKIVITIRELLPLAFGLDLGVDIGKY                                                                                                                                                                                                                                                                                                                                        |
| A0A327L2Q5 | tr A0A327L2Q5 A0A327L2Q5_9RHIZ   | MVTSRDGEDEAMMARCVALSRIAVGKGEYFPGAVVAREGRIVAEAINRTIRDGVSRAEVIALARAKAIGRRELRECSLYSNVEPCAMCSYCIREAWVGRVYALGSPVMGGVSKWNILRDDGLSGRMPQVFDAAPEVVSGLVLEQAQA AWRDWSPLAWEMITLRGLMTDPSARPECTRARAARPSLWHHLVALIERPPRYVDPTSAEAGHADL                                                                                                                                                                                                                                                                           |
| S2DR30     | tr S2DR30 S2DR30_9BACT           | MKMKKKIEITVLEVIQKSEWSEKEDRSRIERAIHVEHAHAPYSNFMVGTALLDNGQIFANNQENVSFVPGICAERAVLSYAMGNFNNRPVKLAVAKRRSDSTWATVTPCGLCRQTINEYEVKFGHPHIEMLNPGEEILKASGIDQLLPPRFNDLNS                                                                                                                                                                                                                                                                                                                                    |
| A0A369QGF1 | tr A0A369QGF1 A0A369QGF1_9BACT   | MEEHEKWMHWLCLNLAQQALQQGDFPVGAVVQKGLIGQVEAGQLKDDITCHAEMEAIIRDARQTINTADLQNCILYSTHEPCIMCSYVIRHKKISRVVGTTVPEVGGSSAYPLLSAPDISIWWAPPHLVTGVLAECALQSAYKQKFKK                                                                                                                                                                                                                                                                                                                                            |
| A0A1W6X4U4 | tr A0A1W6X4U4 A0A1W6X4U4_9RHIZ   | MTNPSRQERWDRRFLERLAKVFGTWSKDRSAGTGCVIVGPDRLLRASGYNGFARGIDDEVPERHERPAKYSWTEHAERNAIYNAAKGLISLDGCTAYVNWFCIDCARAIVQAGIVRLVGLPHDADQRWGSEFKFATEMLRESGIEIILYDIPELAARK                                                                                                                                                                                                                                                                                                                                  |
| A0A238BW09 | tr A0A238BW09 A0A238BW09_9BILALA | MEEMARKIRTKAKKANSYCNMTMFLISKASIVLLKAECKRIELTVVIFRFLIKMNASEPNLDCDMTVIKSMLKITHVIFDLGILLIDTEVVFQVSKVQCLLSKYNKFTPHLRGLVTGMPKKAAVTYILEHEKLSAKVDVDEYCKYDEMAEEMLPKCSLMPGVMKLVRLKTHSIPMAICTGATKKEFEIKTRYHKELDLISLRLVSGDDPAVKRGPAPDPFLVTMDRFKQPEKAENLVLFEDAANGVCAAIAGMNVIMVPLDLYMKIPEGLQNKINSFSDNLIISDNLNVALMSLKKELSEEEVHFLNRAFEIADVAVLNNNEVPVGCVFVFEQGEVAFGRNDVNRTKNPTYHAEMVALKMMQKWCMDNDRDLEEIMRRTLYVTLPCIMCASALYHLRLKILYGAANERFGLVSVGTREKYGAKHFIEIMPNLVSDRAVLLKKEFYEQNPFCPEEKRKVKKPKKSGNNNDNSDDAVALNV |
| A0A1J5H6Z0 | tr A0A1J5H6Z0 A0A1J5H6Z0_9BACT   | MAYQPSEKFMQMAIDKTREGVLSGQTPFGACIVKDGKVVACEHNTVWQDITSHGEVHTIRAACKAIGSIDLSCGILYSTCEPCPMCFSAIHWARIDTVVYGAFIADAQDAGFNELTISNEKMKFEFGSPVNFISGFMRDENVALFKLWKEQGANNVY                                                                                                                                                                                                                                                                                                                                   |
| A0A3C2D945 | tr A0A3C2D945 A0A3C2D945_9BACT   | MKTTEIRIIVHEYQNIDELTEENDQYLLHEARRITEFAYAPYSGFHVGAAILLNGMIVKGNQNSAYPSGLCAERVALFYANANYPDSEVKTAISAANKGILVNDPIKPCGGCRQTLSEAEVRFSGSPIRIILDGQDSILVHGVESLLPLSFSKDLASPLAATGR                                                                                                                                                                                                                                                                                                                            |
| A0A1I7EYS3 | tr A0A1I7EYS3 A0A1I7EYS3_9BURK   | MKFKLDPSRPDEDYLLGVALAVRRKANCTGNRVAIVKKNRVIATGYNGVPEDMPNCLDGGCLRCSNPGGQFKSGTRYDLICVHAEQNALLTAARFGISVEGAHLYTMMQPCFCAKEILQAKIEKVFYLPVWPTDVPVMDAAMKAEYAKIIGKLVKLDFFDDPVATWAVTTMRQAALASDKNPDKTTPKAKKKVAKKKSRTSPR                                                                                                                                                                                                                                                                                     |
| H8GQX8     | tr H8GQX8 H8GQX8_METAL           | MNHEHFMRRAIELARQAPQYFPGAVIVRRDDGGCVGQGFNRSDLNPTYHGEMVAINDCAVRHCAEDWRGFDLYTTAEPCAMCQGAIEWAGIRVFGYTSIPYLQKLGWVQIDLRAAEVSARAVFRDRTLIVGGILETECNALFAAARRGCFGTGSE                                                                                                                                                                                                                                                                                                                                     |

|            |                                |                                                                                                                                                                                                                                                                                                                                                                                                             |
|------------|--------------------------------|-------------------------------------------------------------------------------------------------------------------------------------------------------------------------------------------------------------------------------------------------------------------------------------------------------------------------------------------------------------------------------------------------------------|
| A0A0S8HZN3 | tr A0A0S8HZN3 A0A0S8HZN3_9CHLR | MDEHDIRFLRASFDVARNARKNGNHPPFGALLVDEHGRIVMEAVTAKDCTGHAETNLMREASSKYDSDFLANCTIYTSTEPCPMCAIFWSNVRRVYVGLSEESLYEIAGRGSEEVFLFSCREIFERGGKLVIGPLLEDEAREVHMGMFWR                                                                                                                                                                                                                                                      |
| E3SF31     | tr E3SF31 E3SF31_9CAUD         | MKPTTVLQIAYLVSQESKCCSWKVGAVIEKNRIISTGYNGSPAGGVNCCHEAEQGWLLNKPVPVLPVGHKSECVRFSQVDRFVLAKAHREAHSAWSKNNEIHAELNAILFAARMGSSIEGATMYVTLSPCPDCAKAISQSGIKLVYCETYDKNIPGWDDILKNAGIEVFVNPKRSLDKLNWENINEFCGE                                                                                                                                                                                                              |
| F8AAC6     | tr F8AAC6 F8AAC6_THEID         | MIRAPWHEYFMILLAKIVALRSGCNSRSPGAVIVKNKRILATGYNGMPGAWHCTDRGPGYCFRREKGIPIIDIKYFNCRATHAEANAIAQAARFGISVEGASLYCTLAPCYVCLKLIASAGIKVYEHYDYSRDFERDQFWKEAIKEAGLEKFEQITVSVQEVMEQLQEILPYPTSKRRLAPTEFLDEFEDGKGYVPSIEVLFNKLNYLTRQALKDITFVIEKTTVTEEPGISFYLSGKMVELSELINTVKKQINADQNFYFLAKHNAIEAKIEILREAENIRLKAFLNECPLESFKRIAESLDYILYQVSNLSLPTRELSVNLRLI                                                                      |
| A0A2H4ZNK4 | tr A0A2H4ZNK4 A0A2H4ZNK4_9EUKA | MKKQLSRKIQEEWMSRLLRNAYDAGTYGEVPIAAVILNESGQCIGWGRNCREKQDNPLGHAEIILRQASYLKKSWRFNCTMLVTLPCPMCAAGALLQARINHIYGASDYKRGFGGVLDSLKNSSAHKKIETRGVKSQSCQLLETWFRRRRRV                                                                                                                                                                                                                                                    |
| A0A239N5N1 | tr A0A239N5N1 A0A239N5N1_9PSED | MEGRAGIIPFDEGGAAMPAAEDSPMQHLAYMREALALARANVEAGGRPFAGVLVRDGEVIARAANGTHLDHDPATAHAELLALRAAGRALGSPRLDGCVVYASGHPCPMCLAAMHLSGVSAAYYAYSNADGEPYGLSTAAVYAQMAQPVWVQSLPLQALRPEDEEGLYGFWRERRP                                                                                                                                                                                                                            |
| A0A328VTR2 | tr A0A328VTR2 A0A328VTR2_9PSED | MHPEHLALLQAPASTHADDTWARLCCQALLAVEEGCYAVGALLVDGAGELLCSGRNQVFAPAYASAAHAEMRVLQLEAEHAQVDRRSLTYVSLPECLMCGRILLAGITRVYRLARDRGGFALRHGRLLPAPANLASGLSVVQAKADPYWDLAEHAIGRLQDRQLRQVIRAWRGRQLTDEFSSTKRTHSG                                                                                                                                                                                                               |
| A0A103YG48 | tr A0A103YG48 A0A103YG48_CYNCS | YIRELHASSLRDEHEIQNPKILVIVDRLSSPSLHVLSLSLVLVIFPPFIPLNQTPHMEANAKVVEAKDGTIAVASAFSGHQEVVQDRDHKFLTRAVEEAYKGVCEGDGPFAGVAVVHKDEVVASCNMVLKHTDPTAHAEVTAIREACKLNKIELSDCEIYASCEPCPMCFGAIHLSRIKRLIYGAKAEAAIAGFDDFIADALRGTGFYQKALEIKQADGNGAMIAEQVFEKTKAKFAIDHKFLTRAVEEAYKGVCEGDGRPFAGLVVHKDEVVVSCHNMVLYNTDPTAHAETAIREACKLNRIELSDCEMYSSCEPCPMCFGAIQISRIKRLVYGAKAEASIASGPIPIGDFISDALKGTGFHEKANFEIKQADGNGAMIAEQVFERTKAMFPKR |
| W5M1M8     | tr W5M1M8 W5M1M8_LEPOC         | NSSTRESRVMAQMEINGGASPPKPKGQGSAADQDMITGLINKALQAKEFAYCYPYNSFRVGAALMTNDGRVFTGCNVENACYNLGVCAERTAILKAVSEGYESFRAIAVSSDLQDQFISPCGACRQVMREFGTGWDVFLTKVDGYSVVRMTVDELLPMSFGPDDLKVKVFLQNGHEVSTQFYTHSPCEAGENNN                                                                                                                                                                                                          |
| A0A3N5YPZ2 | tr A0A3N5YPZ2 A0A3N5YPZ2_9ALTE | MSNSETHEIQALVDAQAQKQSYSPYSFQVGAIFADDGNTYSGCNIENAVYPLGQCAEATAIGMMIMQGAKRIEDIMIASPNDQVCPGCCGRQKISEFGTAETKIHMVTRSGEVSTVTLGELLPLAFDSL                                                                                                                                                                                                                                                                           |
| A0A2A9NC86 | tr A0A2A9NC86 A0A2A9NC86_9AGAR | MTNSTLSNEDRTRLIQGAFQARKKTYSPYNSFPVGAALLTDDGRIIEGANIENASYGGTICAERTAIVKAVSDGYRHFAGIAVTTKMPTRVSPCGICRQVREFCSLDMPVLLVPGDYQQRNPVDDGDADKPGVITEGGVRETTL GALLPDSFGPENLPPRA                                                                                                                                                                                                                                          |
| A0A2D6RD43 | tr A0A2D6RD43 A0A2D6RD43_9GAMM | MNIENLITENDETIRRCIELAGESVKNKGDKPFALLAKDGNIIFFESSNNAKTVPYHAEILTMDAQDKLNTDLSDYALYSNCEPCPMCSFMIREYKLDKVVFSVHSPYMGQSRWNILEDDVLRFRKPYFSKPPNVVGGVLESEGKRIFDKVGLWMFSGKE                                                                                                                                                                                                                                            |
| A0A0H3AVL6 | tr A0A0H3AVL6 A0A0H3AVL6_BRUO2 | MHAKGYSQQERRIIPFANFRFRELCSNLSLHGLRAKFPQYTKWDPMRKAASITKANSATPMDIALEEAHAAGERGEVPIGAVIVRDGEIIRAGNRTRFNDVTAHAEILTIRQAGEMLGSERLIDCDLYVTLPCAMCAAISFARIRRLYYGASDPKGGGIEHGGFRYTPQCHHAPEIYPGCEADARKILKDFFREKR                                                                                                                                                                                                        |
| A0A242H531 | tr A0A242H531 A0A242H531_9ENTE | MFIVKNNIEVIQQAELDAKFMKQALKLAKDASNNNGNEPFGAVLVKNDKVLITGENQIHTESDPTYHAELGIIRDICTSQKITDLSEYTLTSCPCCMCAGAMVWSNLDLDRMVYGLGHDELAEIAGFNIMIGSEEIIFSKSPNRPEVAKGVLEKAAVPVYVDYFQR                                                                                                                                                                                                                                      |
| A0A2R6XE2  | tr A0A2R6XE2 A0A2R6XE2_9BACL   | MSGRISWHEYFMAQAKLIALRATCTRLMVGAVIVDRRVIAGGYNGSIAGDEHCDIVGCKVRDGHCIIRTHAEQNALMQCAKFGVSTDGAELYVTHFCLNCTKLIQAGIRHIYEVYRVDYPIELLEKAGVTTQITVDLNAVYQVMSKVSTDPALTYVPESKAQKDEYQSVGKIV                                                                                                                                                                                                                               |
| A0A139SHT6 | tr A0A139SHT6 A0A139SHT6_9BACT | MSEANASSELSRNSPVELIAEAAAGKFRRTWDEYFMATAVLISTRSCSERLNVGCIVTAGESHKNRIVAAGYNGHLPGPSHTSRMRDGHQATVHAEQNAISDAARRGSSVEGCTAYVTHYPCINCAKILASAGIAKICRYLDYHNDPLVKPMLAEAGIEIVQLGEAAS                                                                                                                                                                                                                                    |
| A0A261DBH2 | tr A0A261DBH2 A0A261DBH2_9RICK | MVMKKLITVTKRSTEFNNFFMEEALKQAQFALDKNEIPVGAIVNRITNKVIAKAHNIVEQTKNPVLHAEIVAINQSQILSSKNLSDCDMYVTLPCVMCSGAI FARIGRLFYAANDPKQGAIEGGRFFNSKSCFYRPEIYSGFSAKISENLIKEFFYNVRYQKCNP                                                                                                                                                                                                                                      |
| A0A2N0XZK6 | tr A0A2N0XZK6 A0A2N0XZK6_9VIBR | MTDNSLHESYMRQAFELSKSALPGCRPNPPVGVCFVKDGEVVSQPPGNHHAEGAAIAYTGSYDGLVAVYVTL EPCSFQGRTPSCAKALVRVPEKVVYAILDPDTRNSGAGIKILEDAGIDVEVGLLGEVASFLNPLYLRN                                                                                                                                                                                                                                                               |
| A0A1V5R0F9 | tr A0A1V5R0F9 A0A1V5R0F9_9BACT | MTKETTTLHALDDFCMKALLLAKRAFRADDEVVPGALVVDSSNKVIGRGRVYQVEKRSQRAHAEQLAIEQACKKIGDWRLGECTLYVTLPECTMCMGLIKLSRIERVVFGAASPLFGYQLDKNRKSQLYKKGVIKIRKGVGKATAAALLKDFFKNKRMM                                                                                                                                                                                                                                             |
| A0A2W0H8Y3 | tr A0A2W0H8Y3 A0A2W0H8Y3_9BACI | MKNNGRLDHEYFMTEALQEAKEAGQRGDLPIGAVIVHNGRIIARGSNMRKTAGIKISHAENAMHNAPYLMKHASECVIYTTLEPCIMCLTTLVMANIDSIVFAADDKYMNMKPFIDANSYIRDRHQYKGGVCRGGESEALLRKYSPYAAELALNGTHPHHRKGGGA                                                                                                                                                                                                                                      |
| A0A261BDB7 | tr A0A261BDB7 A0A261BDB7_CAERE | LYKLYFRMTTITKANLTQFEQELVDKAVGAMEKAYCKYSFGKVGAAALVCEDGEIIGANHENASYGATICAERSAMVALTGKGRKFKLLAVATELEAPCSPGICRQYLIEFGDYKVLGSSSDQIETTTTYGLLPYAFTPKSLDDHEKEAEERNHQEGEKKH                                                                                                                                                                                                                                           |

|            |                                |                                                                                                                                                                                                                                                                                                                                                                                                                                                                                                                                                                                                        |
|------------|--------------------------------|--------------------------------------------------------------------------------------------------------------------------------------------------------------------------------------------------------------------------------------------------------------------------------------------------------------------------------------------------------------------------------------------------------------------------------------------------------------------------------------------------------------------------------------------------------------------------------------------------------|
| A0A2E1PHI6 | tr A0A2E1PHI6 A0A2E1PHI6_9GAMM | MKELLIHSHWMLNSNSKLIMERVEISEINLKNKGIPIAAVIVDKKNYEIISESQNEDSPIGHAELLAITKALKKLNTRNLDSTNLFVTIEPCMCAYAIASKCHINRLYFGSEDEKGGVINGPRIFESHNLKKIDYVSHCYHEKTTQLMQSFFQLKRNQQ                                                                                                                                                                                                                                                                                                                                                                                                                                        |
| A0A378LUA7 | tr A0A378LUA7 A0A378LUA7_9GAMM | MDTIKKMISNAHNTLAHSYSPYSKFSVASCICTDKDNFYTGNNVENSAYGLAICAETSASISAMVTAGEKRIKSMVVMAGTNILCSPCGACRQRIYEFSTPDTLIHLCDKNSILRTFKINELLPEAFKDFDNP                                                                                                                                                                                                                                                                                                                                                                                                                                                                  |
| A0A139HQ78 | tr A0A139HQ78 A0A139HQ78_9PEZI | MADSLKSKPGHARHDTALIHGLSQSDVQKLESCVDAKSKAYCPYSHFRVGCVAVLLANGDVVQGANVENAAYVPGTCAERVALGTAVGAKKGDFRALAVSTDISPPASPCGMCRQFIREFCELNTPILMYDKDGKSVVMTLEQLLPMSPFGPKLLPPGQLENGLMQQTQSSFVTRAFSTTSSRRQDDTPQVPQSHYDFFPQTFPQGGPPKTSFSPDLKQLRKEFLQLQAKAHPDLAPQDQKRRAEALSMRINEAYKTLQSPLRRAQYLLSQQGDIVDEETAKLDDSSLLMEVMEAREAVEEVEDEEQLNEIRAENNGRIEESVRVLEDAFRDNEFEKAAQEAIRLRYWVNIIESIQGWKEKNGGGILHH                                                                                                                                                                                                                      |
| A0A2A9FXV0 | tr A0A2A9FXV0 A0A2A9FXV0_9VIBR | MCNLKENKMDKDYFFACDATIVEGREGTGGPFGATLNRNGEVVCSVANTVLKMDISGHAEMVAVREACKKLDLTLSDCVMYATCEPCPMCVSMLWAGIKTCYYASTHLDAKHGFSQQRLDYLDGSDTSTLNMVHIEDNRDDCAKIWTEFRHLNETKNDG                                                                                                                                                                                                                                                                                                                                                                                                                                        |
| A0A1A8AG96 | tr A0A1A8AG96 A0A1A8AG96_NOTFU | MEHSDRWSRAEPGLTSSRETRDGTQTDCKLQGHGPRLSKVNLFLLSLWMEFLPQEQDEENGQSQIRRSGLVVVREGKVVGLHCSGADLHAGQAAILQH GASLANCQLFFSRRPCATCLKMIINAGVRQITFWPGDPEISMLTSNQTHSQRSTSQSITAEASLDATAVEKLSNSRPQICVLMQPLAPGLVQFVDETSRRSDFMERMMDDDPELDSEKLFNSDRLRHLKDFCRHFLIQTDRHDKILSQMGLKNFCVEPYFNSLRNMTLVEVLAAVAAGMPQHQHYGFYREESLDPHPVDVSAVARHCIVQARLLSYRTEDPKVGVGAVIWAQKQSACCCGTGRLYLIGCGYNAYPAGSKYAEYPQMDNKKQEDRERKYRYIVHAEQNALFRTRDIKPDCEMSLFTVKPCDCEIPLIRGAGVKHIYTSQDRDKDKGDISYLRFGSLKGVCKFIWQRSPVSSASSLHLTNGCVGKHVRQAEQQIYKKNKCLTKGSSGSSDIC                                                                                    |
| A0A3E2VN88 | tr A0A3E2VN88 A0A3E2VN88_9FIRM | MEKEITNMDKQKLIQMAVDGLGRSYAPYSHFHVSAALLCADGTVYTYGNNIENAAITPSVCAERCAIFKAVGDGRREFEAIAVCGGPDGVIEDYCPGCVCRQVMREFCDPSSFRVLVAKTAEDYREYTLQLLPDGFDPDLTGSGER                                                                                                                                                                                                                                                                                                                                                                                                                                                     |
| A0A2D5ZRJ2 | tr A0A2D5ZRJ2 A0A2D5ZRJ2_9BACT | MARPVHLHTGERRTEEGATESRAVAATAITRAPRAPPATGRERDGPPRRRVFGGGLRVGDPSGYDRGESKPIGGPLTEKRSWHSYFMRIAGEVATRATCDRHVGVAVIVNRNLTSTGYNGSIRGMPHCCDDVGHDMVDGHCIATIHAEANAILQAARNGVMIQDGSYITASPCWNCFLVANAGLKRYYGFEFYRDKRSFEVARRLGDIDLMHIEV                                                                                                                                                                                                                                                                                                                                                                                |
| A0A1B8WPS3 | tr A0A1B8WPS3 A0A1B8WPS3_9BACI | MEGVQLIYQFQWGNLIMTVNKEDLYLDVARNTIKTLYVDGKHHVGAARVTKTKGIYSAVHLEANIGRVSVAEAIALGKAISEGESEFDTIVAVRHPDPTQENQKIEVVSPPGICRELISDYGKGTNVILKNKEGIYKTVISDLLPNKYIREDN                                                                                                                                                                                                                                                                                                                                                                                                                                              |
| A0A1W5ZQK9 | tr A0A1W5ZQK9 A0A1W5ZQK9_9BACI | MNRFMERAVSLAAENVRVGGQPFQAVLVKDDDELVAEGVNEHMLNYDVSGHAELLAIRRAQGLQTHDLSGYTMYASGEPCLMCLSAMFYAGIKDVFYCATVEAAQVLEKSKNVYDDLQKSKGERSLVMKQMPLEDDQEDPMKLWDERTNHNGTS                                                                                                                                                                                                                                                                                                                                                                                                                                             |
| A0A378V0W4 | tr A0A378V0W4 A0A378V0W4_MYCFO | MVHAQFDPTARQALATAVEAKTRKDLTWQQIADAAELSPAFVTAAVLQGHALPARSAEVAALLGLDDDAALLQTIPIRGSIPGGIPTDPTIYRFYEMLQVYGTLLKALVHEQFGDGIISAINFKLDVRKVADPEGGERAVITLDGKYLPPNPFDRVYRGGMLMDFAQRTIDIARQNVAEGRPFATVIVKNGEILAESPNLVAQTHDPTAHAELAIRKACTRIGTEHLIGATIYVLAQPCPMCLGSLYYCSPDEVVFLTRDAYEPHYVDDRKYFELNMFYDEFAPKWDQRRRLPMRYEPRDAAVDVYKLWQERNGGERRVPGAPTSTRPGKNPRGE                                                                                                                                                                                                                                                        |
| I3XF03     | tr I3XF03 I3XF03_RHIFR         | MKQRCMSPKSAQRFDNDMHNKDRPMSNELFVAAREAMAKAHAPYSKFPVGAIRAEDGQIYTGANIELNLPFEGWCAETTAISHMVMAGQRKIMEVAVIAEKALALCPPCGGCRQLAEFSGASTRIYLCDETGIKKSLALSDDLPHSFEITEILG                                                                                                                                                                                                                                                                                                                                                                                                                                             |
| F8IEF3     | tr F8IEF3 F8IEF3_ALIAT         | MDAKELETRGWLCMRAVDVIDKKRRGEALAEELRFLIEGYVAGRIPDYQMSAFLMAVVWRGMTREETLVLTRLLADSGERLDLSGIPGVKVDKSTGGVGDKATLVVLPVASIGVPIKMSGRGLGHTGGTIDKLESIPGFRDLSVAELVAQVRQVGIALLGGQTADLAPADKKLYALRDVTGTVESLPIASSVMSSKLAGGADAIVLDVKGDFGAFMKRSRDARRLRLMVEIGEAGARRTVAVLSNMDQPLGCAIGNALEVAEAIRVLSGEGPFDLAEIALALAEEMTVLAGVAATREEARMLRQSVAEGRALETLLRWIAAQGGDPAVVDDPSRLPQAPVQMPYLPKAGFVAKLSALAFGLAAMRLGAGRETKEAIDPSVGIVLHAKVGDVRVQTHRPMFTVHARTGEDALRCIQELEAAIQISDDPVEAPLILARIDRESEALPYADLMDAAREARDRAYVPYSGFAVGALELADGRMVTGANVENASYGLTNAERSAVFRVAEGGPGTKPEIRAVAVIADSPPEVSPCGACRQVLAEFCSPTPVYLGNLQGDVRETTVALLPGAFTDAQMANVRRQDKEA |
| A0A1G3M638 | tr A0A1G3M638 A0A1G3M638_9SPIR | MKTTNINALDKWDLRFLQMAEHWAEWSDPSTKVGAVIVRDPRTIASVGFNGFARGVDRDTRVLRWRELKYLPTVHAELNAILSAPHEPVRGHSYVSPSPSCNACAGVIIQSGIARVAVKCGQVNNPAQWSESNLALTAFAEAGVSIVLVEH                                                                                                                                                                                                                                                                                                                                                                                                                                                |
| A0A3D9LFR2 | tr A0A3D9LFR2 A0A3D9LFR2_9MICC | MEQNDHGSSGAFSDPFEDDIPLTASLPRITGTGSGIDWQRLESTARAAMTRAYVPYRFPVGAALVEDGRVAVGNIENASLGLTCAECSLVSNLQMSGGRIVAFYCVDNGEVLMPGCRQRLLYEFHAPGMRLMGPDELTMDEVLPLAFGPADMTHLSDSAASTDDPGRTR                                                                                                                                                                                                                                                                                                                                                                                                                              |
| A0A3B9YGB5 | tr A0A3B9YGB5 A0A3B9YGB5_9BACT | MAKPISKYRKLIEATAARKKAYSYPYSYQVGAAVLTESGRIYSGANMENASYGLCMCAERVAIANAVTRGEKVLQAVCVVGGKARPCGACRQVLMLEFSTKETELLMVDIPNARRDTVIRTRVYSMLPNPDPFESGMLPQHPQNLRRRKSPQPRRRRSRPHREVSR                                                                                                                                                                                                                                                                                                                                                                                                                                 |
| A0A182F569 | tr A0A182F569 A0A182F569_ANOAL | MPRPSQFRVSSQSLSNSQIQASQSSDSVDITSYVNAVVKALLNLSCTKTIKRADLVNIALKNGRIGRVLQDANIELKEIYGELIEVEKSKTMILCSTLAAGSMDELNDANRRRYTFLYLILGYIFMKNGSVPETIVWEFLETLGIEEQEHHNYFDGVRKLYDLSFKQAYLTRTKQALEGLNDDVMLISWGVRSKHEVSKKDILAGFCVMMNRDPVDFKAQYIEANEKDDKMNNNINGTVDGRNTVEYSSLDASVKELEIAAIKVRNNAYCPYSNFVAGAAALRTVGGDVTGCVENGTGFGPSVCAERTAVACKAVSEGHREFTAVAVVAFQETEFAPCGTCRQTLSEFSRKDIPIYLVKPSVPRVMVTSFLQLLPHAFSPSFLNK                                                                                                                                                                                                      |
| A0A264Z0D4 | tr A0A264Z0D4 A0A264Z0D4_9BACI | MPEPKLIEEAVASKQAYVQSYNFHVGAALLTKDGKLYHGCNIENASYGLTNAERTAIKAVSEGEKEFQAIIVVGDTEGPISPCGACRQVLAEFFSPDTPVILANLKGDHVVNTNINELLPGFFSSKDLQKVKVKNCFKALGSSCLRPI                                                                                                                                                                                                                                                                                                                                                                                                                                                   |

|            |                                         |                                                                                                                                                                                                                                               |
|------------|-----------------------------------------|-----------------------------------------------------------------------------------------------------------------------------------------------------------------------------------------------------------------------------------------------|
| A0A1L9Q1R3 | tr A0A1L9Q1R3 A<br>O A1L9Q1R3_ASPV<br>E | MPLSAEEAALVETATATINSIPLSEEDYSVASAAKASDGRVFTGVNVYHFTGGPCAELVVLGVAAAAGAAQLTHIVAV<br>ANEQRGILSPCGRCRQVLLDLQPNIQVIVGKEGSEQSVPAQLLPFSYRQPDQHTPVIFKALTSSGPVVVDFATWC<br>GPCKAVAPVVGKLESETYTDVRFIQVDVDKARSISQEHDIRAMPTFVLYKDGKLLDKRVVGGNMKELEEQIKAIIA |
|------------|-----------------------------------------|-----------------------------------------------------------------------------------------------------------------------------------------------------------------------------------------------------------------------------------------------|



**Supplementary Table 2.** Sequences of sgRNAs used in this study. Target sites for guided off-target<sup>2</sup>, targeted RNA-seq<sup>3</sup> and Figure 5b<sup>4</sup> are the same as previous publication and not listed.

*S. pyogenes* SgRNA scaffold:

GUUUUAGAGCUAGAAAUAGCAAGUUAAAAUAGGCUAGUCCGUUAUCAACUUGAAAAAGUGGCACCGAGUCGGUGC

*S. aureus* SgRNA scaffold:

GUUUUAGUACUCUGUAAUGAAAAUUACAGAAUCUACUAAAACAAGGCAAAAUGCCGUGUUUAUCUCGUCAACUUGUUGGCG  
AGA

| site | protospacer sequence   | PAM    | Cas9 scaffold    | PAM | Cas9 scaffold      |
|------|------------------------|--------|------------------|-----|--------------------|
| 1    | GAUGUGUCUACUGUUACUUACA | AGGAAT | <i>S. aureus</i> | AGG | <i>S. pyogenes</i> |
| 2    | GCACCCAGGGGUUCUGCAGAGC | AGGGAT | <i>S. aureus</i> | AGG | <i>S. pyogenes</i> |
| 3    | GCAUUCCACUCCGUCCGCCUC  | CGGAGT | <i>S. aureus</i> | CGG | <i>S. pyogenes</i> |
| 4    | GCCACAGACUUUCCAUUUGC   | AGGAGT | <i>S. aureus</i> | AGG | <i>S. pyogenes</i> |
| 5    | GCCACAGUGGGAGGGGACAUG  | GGGAAT | <i>S. aureus</i> | GGG | <i>S. pyogenes</i> |
| 6    | GCCCAGCAAUUCACUGUGAAG  | AGGGAT | <i>S. aureus</i> | AGG | <i>S. pyogenes</i> |
| 7    | GCCCAGCUCAGCCUCUGAUG   | AGGGGT | <i>S. aureus</i> | AGG | <i>S. pyogenes</i> |
| 8    | GCCUGAUCUGCACUGAACAG   | AGGGGT | <i>S. aureus</i> | AGG | <i>S. pyogenes</i> |
| 9    | GCCUCAAGUCUGGUUUUUUAG  | GGGGAT | <i>S. aureus</i> | GGG | <i>S. pyogenes</i> |
| 10   | GCCUGGCAGAUAGAAACCAGG  | AGGAAT | <i>S. aureus</i> | AGG | <i>S. pyogenes</i> |
| 11   | GCGAAAGGCUCGCGCGGAAGGA | AGGAAT | <i>S. aureus</i> | AGG | <i>S. pyogenes</i> |
| 12   | GCUCCUCUACCCUUUAGACUC  | AGGGAT | <i>S. aureus</i> | AGG | <i>S. pyogenes</i> |
| 13   | GCUGCAAGGGUUGGCCAGGCU  | GGGAAT | <i>S. aureus</i> | GGG | <i>S. pyogenes</i> |
| 14   | GGCUCCGUUACUCUCUGAC    | TGGGGT | <i>S. aureus</i> | TGG | <i>S. pyogenes</i> |
| 15   | GGGUACCUAGUGGGUGCAUU   | TGGGGT | <i>S. aureus</i> | TGG | <i>S. pyogenes</i> |
| 16   | GGUGACCCUUGGUUCCAUG    | GGGGAT | <i>S. aureus</i> | GGG | <i>S. pyogenes</i> |
| 17   | GGUCGUAGCCAGUCCGAACCC  | CGGAGT | <i>S. aureus</i> | CGG | <i>S. pyogenes</i> |
| 18   | GUAACUGAACCCUGCAAUCAA  | TGGGAT | <i>S. aureus</i> | TGG | <i>S. pyogenes</i> |
| 19   | GGCCUCCGUUACUCUCUGAC   | TGGGGT | <i>S. aureus</i> | TGG | <i>S. pyogenes</i> |
| 20   | GCUUUCCUUAGCUGUAAAAGAA | AGGGAT | <i>S. aureus</i> | AGG | <i>S. pyogenes</i> |
| 21   | GUGGCACUGCGGCUGGAGGU   | GGGGGT | <i>S. aureus</i> | GGG | <i>S. pyogenes</i> |
| 22   | GUAGGGCCUUCGCGCACCUCA  | TGGAAT | <i>S. aureus</i> | TGG | <i>S. pyogenes</i> |
| 23   | GGCCUCCCAAAGCCUGGCCA   | GGGAGT | <i>S. aureus</i> | GGG | <i>S. pyogenes</i> |
| 24   | GCACAUUCACGGUCUCAGUGC  | AAGGAT | <i>S. aureus</i> | AAG | <i>S. pyogenes</i> |
| 25   | GGAAACCUUGAAUAAGAAUGGA | AGGGGT | <i>S. aureus</i> | AGG | <i>S. pyogenes</i> |
| 26   | GUUUUACUUUUUUUUCUGAGA  | TGGGGT | <i>S. aureus</i> | TGG | <i>S. pyogenes</i> |
| 27   | GUGGCACUGAUCCUUAAUGUG  | TGGGGT | <i>S. aureus</i> | TGG | <i>S. pyogenes</i> |
| 28   | GAAAGAGACAGAGAAGGGGCA  | GGGGGT | <i>S. aureus</i> | GGG | <i>S. pyogenes</i> |
| 29   | GAAGGCUUUACUGUUAUACAGA | AGGGGT | <i>S. aureus</i> | AGG | <i>S. pyogenes</i> |
| 30   | GACCAAACGAGGGACAUUUA   | GGGGAT | <i>S. aureus</i> | GGG | <i>S. pyogenes</i> |
| 31   | GACCAGGUCAGCAACAUGUU   | TGGAAT | <i>S. aureus</i> | TGG | <i>S. pyogenes</i> |
| 32   | GACUCAGCGCCUCCGGGCC    | TGGGAT | <i>S. aureus</i> | TGG | <i>S. pyogenes</i> |
| 33   | GAGAAGAAACCGGAACAGGU   | AGGAGT | <i>S. aureus</i> | AGG | <i>S. pyogenes</i> |
| 34   | GAGUGGGAACUUUCUGAUGCCA | TGGAAT | <i>S. aureus</i> | TGG | <i>S. pyogenes</i> |

**Supplementary Table 3.** DNA sequences of oligos used in this study. Primers for guided off-target<sup>2</sup> and targeted RNA-seq<sup>3</sup> are the same as previous publication and not listed.

Oligos used *in vitro* assays (adaptor sequences were highlighted in yellow, \* stands for phosphorothioate bonds):

Oligo1:

T\*G\*GTTTGTGTATTGGGTGAAGGTGAAAGGGTGAAAAAATTGTCTGTAAGTAAGGGTGGTAAAGAA  
TAAATGTAGGAATTTTGGTGGG\*A\*T

Oligo2:

G\*G\*TTTGTGTATTGGGTGCCTTCTATTTCCAGCTCGAAGCGAAAAACAGATAAGTTCATAACCGCAT  
GTAGGAATTTTGGTGGGA\*T\*A

Oligo3:

G\*G\*TTTGTGTATTGGGTGTATCTTAACAATGTTAATAACGTATAAAGGCTGTTTATTCCCTCGCGCAT  
GTAGGAATTTTGGTGGGA\*T\*A

Oligo4:

G\*G\*TTTGTGTATTGGGTGCGTCAACTTTTCCAGTTCTTAATTAAGACCTTTAGCCGTGTGTGTAATG  
TAGGAATTTTGGTGGGA\*T\*A

Oligo5:

G\*G\*TTTGTGTATTGGGTGGTTTAGCGATTTAACTTCTTAAAAAAAACGTCAGCCCTAAGGTATTATG  
TAGGAATTTTGGTGGGA\*T\*A

Primers used in amplicon sequencing:

|               |                                                              |
|---------------|--------------------------------------------------------------|
| HTS_FP_site1  | ACACTCTTTCCCTACACGACGCTCTTCCGATCTACTGTCTTTTGATCTACAGCAGTTAAT |
| HTS_FP_site2  | ACACTCTTTCCCTACACGACGCTCTTCCGATCTAGCCTCTTTCCTGCTAGAGC        |
| HTS_FP_site3  | ACACTCTTTCCCTACACGACGCTCTTCCGATCTCTTTCGCTGCCCTTTCCTCT        |
| HTS_FP_site4  | ACACTCTTTCCCTACACGACGCTCTTCCGATCTGATATCTCCAGGCTCCTGTCCATTCT  |
| HTS_FP_site5  | ACACTCTTTCCCTACACGACGCTCTTCCGATCTCCATCCTAAGTGAAGCAGCATATTTGA |
| HTS_FP_site6  | ACACTCTTTCCCTACACGACGCTCTTCCGATCTAGGTGGGGTGACTCCTTTTTTGGGA   |
| HTS_FP_site7  | ACACTCTTTCCCTACACGACGCTCTTCCGATCTCTTGTCTGTCCAAGGAGAATGAGGTC  |
| HTS_FP_site8  | ACACTCTTTCCCTACACGACGCTCTTCCGATCTGACCTGGAGGCTGGGATCCACA      |
| HTS_FP_site9  | ACACTCTTTCCCTACACGACGCTCTTCCGATCTCCTTTAGGACACATGCTGTCTACCACA |
| HTS_FP_site10 | ACACTCTTTCCCTACACGACGCTCTTCCGATCTGCCAAAGTCTGAGGTTTAGTTGACTAA |
| HTS_FP_site11 | ACACTCTTTCCCTACACGACGCTCTTCCGATCTAAGCGGGTCTCATTGTTCCCGTGTCT  |
| HTS_FP_site12 | ACACTCTTTCCCTACACGACGCTCTTCCGATCTAACCAGTCCCTGTCTGAATCTATCTA  |
| HTS_FP_site13 | ACACTCTTTCCCTACACGACGCTCTTCCGATCTTGTCTTTCGGGTATCTACTAGGAGTCA |
| HTS_FP_site14 | ACACTCTTTCCCTACACGACGCTCTTCCGATCTGGGCTATCAAACCTCATGATTGGC    |
| HTS_FP_site15 | ACACTCTTTCCCTACACGACGCTCTTCCGATCTAAGCTGTCCAGCTGGAAGCCTGGTAA  |
| HTS_FP_site16 | ACACTCTTTCCCTACACGACGCTCTTCCGATCTGCCTAAGTTATATGCAAACATCATGCC |
| HTS_FP_site17 | ACACTCTTTCCCTACACGACGCTCTTCCGATCTGCTGTCTGGAATACCGAGGAC       |
| HTS_FP_site18 | ACACTCTTTCCCTACACGACGCTCTTCCGATCTACGAGGTAAGTGTGTGGATTAGTTTCA |

|               |                                                             |
|---------------|-------------------------------------------------------------|
| HTS_FP_site19 | ACACTCTTTCCCTACACGACGCTCTCCGATCTAGTGGTTACTTTGCCGGGTT        |
| HTS_FP_site20 | ACACTCTTTCCCTACACGACGCTCTCCGATCTACCCTAGCCCTCGGTGCCCTTAGTT   |
| HTS_FP_site21 | ACACTCTTTCCCTACACGACGCTCTCCGATCTNNNNGAACCCAGGTAGCCAGAGAC    |
| HTS_FP_site22 | ACACTCTTTCCCTACACGACGCTCTCCGATCTNNNNCATTGCAGAGAGGCGTATCA    |
| HTS_FP_site23 | ACACTCTTTCCCTACACGACGCTCTCCGATCTNNNNCAGAGTGTGCTTGCTGCT      |
| HTS_FP_site24 | ACACTCTTTCCCTACACGACGCTCTCCGATCTNNNNGAAACCATGTCTCTGGATGCC   |
| HTS_FP_site25 | ACACTCTTTCCCTACACGACGCTCTCCGATCTNNNNAGGCCTTTCTTGGGGATGC     |
| HTS_FP_site26 | ACACTCTTTCCCTACACGACGCTCTCCGATCTGTGGGAACATCACCGAGCCTGG      |
| HTS_FP_site27 | ACACTCTTTCCCTACACGACGCTCTCCGATCTCTGACACTAAATATGTGGTTTTTTGCT |
| HTS_FP_site28 | ACACTCTTTCCCTACACGACGCTCTCCGATCTCGAATCCTAGGCTCAAGTAATCCA    |
| HTS_FP_site29 | ACACTCTTTCCCTACACGACGCTCTCCGATCTGCCAGTAATTGCATTAACCCCTCACTA |
| HTS_FP_site30 | ACACTCTTTCCCTACACGACGCTCTCCGATCTGGCTCCCCTCTCTCCAGTGTCTCA    |
| HTS_FP_site31 | ACACTCTTTCCCTACACGACGCTCTCCGATCTTCTGCCTGTGTGAAGCTCCC        |
| HTS_FP_site32 | ACACTCTTTCCCTACACGACGCTCTCCGATCTGGGAGTCCCTCCCTCACCCCTGC     |
| HTS_FP_site33 | ACACTCTTTCCCTACACGACGCTCTCCGATCTGTGCCAAGGCATAAAAGCCTTCCCTG  |
| HTS_FP_site34 | ACACTCTTTCCCTACACGACGCTCTCCGATCTACTCGCTGGCCTGGCCTTTCTTCTC   |
| HTS_RP_site1  | TGGAGTTCAGACGTGTGCTCTCCGATCTAAGAAACAGATTACAGAAGTAGATGCA     |
| HTS_RP_site2  | TGGAGTTCAGACGTGTGCTCTCCGATCTTCTCTCCTATGTGTGGCCT             |
| HTS_RP_site3  | TGGAGTTCAGACGTGTGCTCTCCGATCTTACTACTGGAACCCCGACTC            |
| HTS_RP_site4  | TGGAGTTCAGACGTGTGCTCTCCGATCTCCAGCCGATATTCAGAACTAATCAGA      |
| HTS_RP_site5  | TGGAGTTCAGACGTGTGCTCTCCGATCTAACAATGGCAAGGGCCTGCCCTG         |
| HTS_RP_site6  | TGGAGTTCAGACGTGTGCTCTCCGATCTGGGCAGAAGGAAAAATCTATCCTGGAA     |
| HTS_RP_site7  | TGGAGTTCAGACGTGTGCTCTCCGATCTGCACAGAACCCGCTGCTAGAGACTCCA     |
| HTS_RP_site8  | TGGAGTTCAGACGTGTGCTCTCCGATCTGGAAAGTCTGGTTAGAGCTCAGAGGGA     |
| HTS_RP_site9  | TGGAGTTCAGACGTGTGCTCTCCGATCTGTGGTGGAGTGTCTGTGTTGTCT         |
| HTS_RP_site10 | TGGAGTTCAGACGTGTGCTCTCCGATCTATTACAGGTGTGGGCCACCTTGCCC       |
| HTS_RP_site11 | TGGAGTTCAGACGTGTGCTCTCCGATCTTCCGCTCCGGAGTAGGGCTGCAGAGA      |
| HTS_RP_site12 | TGGAGTTCAGACGTGTGCTCTCCGATCTGGAAGGCAGACTGTATCTGGTCTTTT      |
| HTS_RP_site13 | TGGAGTTCAGACGTGTGCTCTCCGATCTTCTAGCAGGAAAGAGGCTCAGGCCA       |
| HTS_RP_site14 | TGGAGTTCAGACGTGTGCTCTCCGATCTACACACAGACACTGCAGAGAATAACA      |
| HTS_RP_site15 | TGGAGTTCAGACGTGTGCTCTCCGATCTCCGCCCAGCACTCGCAGAGCAGA         |
| HTS_RP_site16 | TGGAGTTCAGACGTGTGCTCTCCGATCTGATGAGAATGCACCATGATCCAATCA      |
| HTS_RP_site17 | TGGAGTTCAGACGTGTGCTCTCCGATCTGCAACTCTCTTTTCTCCGGGA           |
| HTS_RP_site18 | TGGAGTTCAGACGTGTGCTCTCCGATCTTACCAAGGAGAGTCATTCCTTTCAGA      |
| HTS_RP_site19 | TGGAGTTCAGACGTGTGCTCTCCGATCTAAGACAGTCTGGGAAGCGTG            |
| HTS_RP_site20 | TGGAGTTCAGACGTGTGCTCTCCGATCTACTTGGTATTTTAGAAGACTGTTTTCT     |
| HTS_RP_site21 | TGGAGTTCAGACGTGTGCTCTCCGATCTTCTTTCAACCCGAACGGAG             |
| HTS_RP_site22 | TGGAGTTCAGACGTGTGCTCTCCGATCTGGGGTCCCAGGTGCTGAC              |
| HTS_RP_site23 | TGGAGTTCAGACGTGTGCTCTCCGATCTAAAAGGGAGATTGGAGACACGGAGA       |

|               |                                                          |
|---------------|----------------------------------------------------------|
| HTS_RP_site24 | TGGAGTTCAGACGTGTGCTCTTCCGATCTAGAGAAATCACACTAGCTAGCCT     |
| HTS_RP_site25 | TGGAGTTCAGACGTGTGCTCTTCCGATCTTGCTCTCAACAAAAGTGAAGAACA    |
| HTS_RP_site26 | TGGAGTTCAGACGTGTGCTCTTCCGATCTGCATAACCTACACACATCCTCTGATA  |
| HTS_RP_site27 | TGGAGTTCAGACGTGTGCTCTTCCGATCTGGATGCGGAAATCCCAACTTATAGC   |
| HTS_RP_site28 | TGGAGTTCAGACGTGTGCTCTTCCGATCTGCCTGGACTCCAGACAGGCTTCC     |
| HTS_RP_site29 | TGGAGTTCAGACGTGTGCTCTTCCGATCTAAGGCCAAGAATCTTGCTAGTAGTGGA |
| HTS_RP_site30 | TGGAGTTCAGACGTGTGCTCTTCCGATCTGGATAGAGCAAAAGAAGTAGTGCCTGG |
| HTS_RP_site31 | TGGAGTTCAGACGTGTGCTCTTCCGATCTTGAAACTGTCACTGAAACATCTGGT   |
| HTS_RP_site32 | TGGAGTTCAGACGTGTGCTCTTCCGATCTGTTCTCAAGAAAAGGCCACCCCTCAG  |
| HTS_RP_site33 | TGGAGTTCAGACGTGTGCTCTTCCGATCTTGCTTAGAGGGTAAAAACCAGGAGGA  |
| HTS_RP_site34 | TGGAGTTCAGACGTGTGCTCTTCCGATCTGGGAGAGAGGCAGGGCGGCATG      |

**Supplementary Table 4.** DNA sequences of mammalian expression plasmids for the core CBEs showed in this study. The deaminase sequence is highlighted for BE4-rAPOBEC1. For the rest of constructs, only the deaminase sequences are shown. The backbone sequences are identical.

**BE4-rAPOBEC1**

TGCTTCGCGATGTACGGGCCAGATATACGGCTTGACATTGATTATTGACTAGTTATTAATAGTAATCAATTACGGGGTCATTAGT  
TCATAGCCCATATATGGAGTTCCGCGTTACATAACTTACGGTAAATGGCCCGCCTGGCTGACCGCCCAACGACCCCGCCCAT  
TGACGTCAATAATGACGTATGTTCCCATAGTAACGCCAATAGGGACTTTCATTGACGTCAATGGTGGAGTATTTACGGTAAAC  
TGCCACTTGGCAGTACATCAAGTGTATCATATGCCAAGTACGCCCCCTATTGACGTCAATGACGGTAAATGGCCCGCCTGGCA  
TTATGCCAGTACATGACCTTATGGGACTTTCCTACTTGGCAGTACATCTACGTATTAGTCATCGCTATTACCATGGTGTATGCGG  
TTTTGGCAGTACATCAATGGGCGTGGATAGCGGTTTGACTCACGGGGATTTCGAAGTCTCCACCCCATTTGACGTCAATGGGAGT  
TTGTTTTGGCACAAAATCAACGGGACTTTCAAAATGTCGTAACAACCTCCGCCCATTTGACGCAATGGGCGGTAGGCGTGT  
CGGTGGGAGGTCTATATAAGCAGAGCTGGTTTGTAGTAAACCGTCAGATCCGCTAGAGATCCGCGGCCGCTAATACGACTCACTA  
TAGGGAGAGCCGCCACCATGAGCAGCGAGACAGGCCCTGTGGCCGTGGACCCACCCTGCGGGCGGAGAATCGAGCCTCATG  
AGTTTCGAGGTGTTCTTCGACCCCTCGGGAAGTGAAGAAAAGAGACATGCCTGCTGTACGAGATCAACTGGGGCGGAAGACACAGC  
ATCTGGCGGCACACCAGCCAGAACACCAACAAGCAGCTGGAAGTGAATTTTCATCGAGAAGTTCACCACCGAAAAGATACTTCTG  
CCCCAACCCAGATGCAGCATCACATGGTTCTGTCTTGGTCCCCTTGGCGGAGTGTCTTAGAGCCATCACCAGTTCCCTGA  
GCAGATATCCTCACGTGACACTGTTTCATCTACATCGCCAGACTGTATCACCACGCCGATCCTAGAAAATAGACAGGGCCTGCGG  
GACCTGATCAGCTCCGGCGTGACCATCCAGATCATGACCGAGCAGGAGAGCGGCTACTGTTGGAGAAAATTCGTGAACACTCTC  
TCCTAGCAACGAGGCCCACTGGCCTAGATACCCCCACCTGTGGGTGCGGCTGTACGTGCTGGAAGTGTACTGCATCATCCTGG  
GACTGCCTCCATGTCTGAACATCCTGAGAAGAAAAGCAGCTCAGCTGACCTTCTTCAAAATCGCCCTGCAGAGCTGCCACTAC  
CAGAGACTGCCCCCCACATCCTGTGGGCCACCGCCCTGAAGCTTAAGAGCGGAGGATCTCTTAAGAGCGGAGGATCTAGCC  
GCGGCTCTAGCGGATCTGAGACACCTGGCACAAGCGAGTCTGCCACACCTGAGAGTAGCGGCGGATCTTCTGGTGGCTCTGA  
CAAGAAGTACAGCATCGGCCCTGGCCATCGGCACCAACTCTGTGGGCTGGGCCGTGATCACCGCAGTACAAGTGGCCCAAC  
AAGAAATTCAGGTGTGGGCAACACCGACCGGCACAGCATCAAGAAGAACCTGATCGGAGCCCTGCTGTTCCGACAGCGGCG  
AAACCCGAGGCCACCCGGCTGAAGAGAACCGCCAAGAAAGATACACCAGACGGAAGAACCAGGATCTGCATCTGCAAGAA  
GATCTTCAGCAACGAGATGGCCAAGGTGGACGACAGCTTCTCCACAGACTGGAAGAGTCTTCTGGTGGAAAGGATAAGA  
AGCAGAGCGGCCACCCATCTTCGGCAACATCGTGGACGAGGTGGCCTACCACGAGAAGTACCCACCATCTACCACCTGAG  
AAGAAACTGGTGGACAGCACCGACAAGGCCGACCTGCGGCTGATCTATCTGGCCCTGGCCACATGATCAAGTTCGGGGG  
CACTTCTGATCGAGGGCAGCTGAACCCCGACAACAGCAGCTGGACAAGCTGTTTCATCCAGCTGGTGCAGACCTACAACCA  
GCTGTTTCGAGGAAAACCCCATCAACGCCAGCGGCGTGGACGCCAAGGCCATCCTGTCTGCCAGACTGAGCAAGAGCAGACGG  
CTGAAAATCTGATCGCCAGCTGCCGGCGAGAAGAAGATGGCCTGTTCGAAAACCTGATTGCCCTGAGCCTGGGCCTGA  
CCCCAAGTTCAAGAGAACTTCGACCTGGCCGAGGATGCCAAACTGCAGCTGAGCAAGGACACCTACGACGACGACCTGGA  
CAACTCTGGCCAGATCGCGACCAAGTACGCGACCTTCTGCGGCGGAGGAAGATTTTACCATTCTGAAGGACAAACCCGGA  
GACATCCTGAGGAGTGAACACCGAGATCACCAAGGCCCCCTGAGCGCCTCTATGATCAAGAGATACGACGAGCACCACAGG  
ACCTGACCCTGCTGAAAGCTCTCGTGGCAGCAGCTGCCTGAGAAGTACAAGAGATTTTCTTCGACCAGAGCAAGAACGGC  
TACGCCGGCTACATTGACGGCGGAGCCAGCCAGGAAGATTTCTACAAGTTCATCAAGCCCATCCTGAAAAGATGGACGGCAC  
CGAGAACTGCTCGTGAAGTGAACAGAGAGGACCTGCTGCGGAAGCAGCGGACCTTCGACAACGGCAGCATCCCCACCA  
ATCCACCTGGGAGACTGCACGCCATTTCTGCGGCGGAGGAAGATTTTACCATTCTGAAGGACAAACCCGGAAGATCGA  
GAAGATCCTGACCTTCCGCATCCCCTACTACGTGGGCCCTTGCCAGGGGAAACAGCAGATTCGCTGGATGACCAGAAAAG  
GCGAGGAAACCATCACCCCTGGAATTCGAGGAAGTGGTGGACAAGGGCGCTTCGCCCCAGAGCTTCATCGAGCGGATGAC  
CAACTCGATAAAGAACCTGCCAACGAGAAGGTGCTGCCAAGCAGCAGCTGCTGTACGAGTACTTACCCTGTATAACGAGC  
TGACAAAAGTGAATACGTGACCGAGGGAATGAGAAAAGCCCGCTTCTGAGCGGCGAGCAAAAAGAACCTCGTGACCT  
GCTGTTCAAGACCAACCGGAAAGTGACCGTGAAGCAGCTGAAAGAGGACTACTTCAAGAAAATCGAGTCTTCGACTCCGTGG  
AAATCTCCGGCGTGGAAAGATCGGTTCAACGCCTCCCTGGGCACATACCACGATCTGCTGAAAATTCAGGACAAGGACTTC  
CTGGACAATGAGGAAAACGAGGACATTCTGGAAGATATCGTGTGACCTGACACTGTTTGAGGACAGAGAGATGATCGAGGA  
ACGGCTGAAAACCTATGCCACCTGTTTCGACGACAAAAGTGAAGAGCAGCTGAAGCGGCGGAGATACACCGGAGGAGG  
CTGAGCCGGAAGCTGATCAACGGCATCCGGGACAAGCAGTCCGGCAAGACAATCCTGGATTTCTGAAGTCCGACGGCTTCG  
CCAACAGAACTTCATGCAGCTGATCCACGACGACAGCCTGACCTTAAAGAGGACATCCAGAAAAGCCAGGTGTCGGGCCAG  
GGCATAGCCTGCACGACGACATTGCCAATCTGGCCGGCAGCCCGCCATTAAGAAGGGCATCCTGCAGACAGTGAAGGTGG  
TGGACGAGCTCGTGAAGTGTGGGCGGCACAAGCCGAGAATCGTATCGAAAATGGCCAGAGAAACCAACGACCCCA  
GAAGGGACAGAAGAAGCAGCCGCGAGAGAATGAAGCGGATCGAAGAGGGCATCAAGAGCTGGGACGACGATCCTGAAAGAA  
CACCCCGTGGAAAACACCCAGCTGCAGAACGAGAAGCTGTACCTGTACTACCTGCAGAATGGGCGGGATATGTACGTGGACCA  
GGAAGTGGACTCAACCGGCTGTCCGACTACGATGTGGACCATATCGTGCCTCAGAGCTTCTGAAGGACGACTCCATCGACA  
ACAAGTGTCTGACCAGAAGCGACAAGAACCAGGGGCAAGAGCGACAACCTGCCCTCCGAAGAGGTGCTGAAGAAGATGAAGAA  
CTACTGGCGGACGCTGCTGAACGCCAAGCTGATTACCCAGAAAAGTTCGACAATCTGACCAAGGCCGAGAGAGGGCGCTG  
AGCGAAGTGGATAAGGCCGGCTTCATCAAGAGACAGCTGGTGGAAACCCGGCAGATCACAAAGCAGTGGCACAGATCCTGG  
ACTCCCGGATGAACACTAAGTACGACGAGAATGACAAGCTGATCCGGGAAGTGAAGTGTATCACCTGAAAGTCCAAGCTGGT  
TCCGATTTCCGGAAGGATTTCCAGTTTTACAAGTGGCGGAGATCAACAAGTACCACCACGCCACGACGCTACCTGAACGC  
CGTCTGGGAAACCCCTGATCAAAAAGTACCCTAAGTGGAAAGTTCGACTCGTGTACGGCGACTACAAGGTGTACGACCTGC  
GGAAGATGATCGCAAGAGCGAGCAGGAAATCGGCAAGGCTACCGCCAAGTACTTCTTACAGCAACATCATGAACTTTTTCA  
AGACCGAGATTACCCTGGCCAACGGCGAGATCCGGAAGCGGCCTCTGATCGAGACAAACGGCGAAACCGGGGAGATCGTGTG

GGATAAGGGCCGGGATTTTCCACCGTGCAGAAAGTGTGAGCATGCCCAAGTGAATATCGTGAAAAAGACCGAGGTGCAG  
ACAGGCGGCTTACGACAAAGAGTCTATCCTGCCAAGAGGAACAGCGATAAGCTGATCGCCAGAAAGAAGGACTGGGACCCCTAA  
GAAGTACGGCGGCTTCGACAGCCCCACCGTGGCCTATTCTGTGCTGGTGGTGGCCAAAGTGGAAAAAGGCAAGTCCAAGAAA  
CTGAAGAGTGTGAAAGAGTGTGCTGGGGATCACCATCATGGAAGAGCAGCTTCGAGAAGAATCCCATCGACTTTCTGGAAAGC  
CAAGGGCTACAAAAGAGTAAAAAGGACCTGATCATCAAGCTGCCTAAGTACTCCCTGTTGAGCTGGAAAACGGCCGGAAGA  
GAATGCTGGCCTCTGCCGGCGAACTGCAGAAGGGAAACGAAGTGGCCCTGCCCTCCAAATATGTGAACCTCCTGTACCTGGCC  
AGCCACTATGAGAAGCTGAAGGGCTCCCCGAGGATAATGAGCAGAAAACAGCTGTTTGTGGAACAGCACAAGCACTACCTGGA  
CGAGATCATCGAGCAGATCAGCGAGTTCTCCAAGAGAGTGTCTGGCCGACGCTAACTGGACAAAAGTGTCTCCGCTACA  
ACAAGCACCGGGATAAGCCCATCAGAGAGCAGGCCGAGAATATCATCCACCTGTTTACCCTGACCAATCTGGGAGCCCTGCC  
GCCTTCAAGTACTTTGACACCACCATCGACCGGAAGAGGTACACCAGCACCAAGAGGTGCTGGACGCCACCCTGATCCACCA  
GAGCATCACCGGCTGTACGAGACACGGATCGACCTGTCTCAGCTGGGAGGTGACTCTGGTGGAAAGCGGAGGATCTGGCGG  
CAGCACCAATCTGAGCGACATCATCGAGAAAAGAGACAGGCAAGCAGCTGGTGCACACCGCCTACGATGAGAGCACCGACGAGAAGT  
AGGTGGAAGAAGTGTGCGCAACAAGCCCGAGTCCGACATCCTGGTGCACACCGCCTACGATGAGAGCACCGACGAGAAGT  
GATGCTGCTGACCTCTGACGCCCTGAGTACAAGCCTTGGGCTCTCGTGATCCAGGACAGCAACGGCGAGAACAAGATCAAGA  
TGCTGAGCGGGCGGCTCTGGTGGCTCTGGCGGATCTACAAACCTGTCCGATATTATTGAGAAAAGAAACCGGAAACAGCTCGTG  
ATTCAGAGTCTATTCTATGCTCCCGAAGAAGTTCGAGGAAGTTCGAGAAACAAGCCTGAGAGCGATATTCTGGTCCATACA  
GCCTACGACGCTTACCGATGAGAATGTCTGCTCCTCACCAGCAGCAGCTCCCGAGTATAAGCCATCGGCACTACCGCTGCTATCA  
GGACTCCAATGGGAAAACAAAATCAAATGCTCCCAAAGAAAAACGCAAGGTGGAGGGAGCTGATAAGCGCACCGCCGATG  
GTTCCGAGTTCGAAAGCCCCAAGAAGAAGAGGAAAGTCTAACCGGTGATCATCACCATCACCATTTGAGTTTAAACCCGCTGATC  
AGCCTCGACTGTCCCTTAGTTGCCAGCCATCTGTTGTTGCCCTCCCGCTGCCCTTCCCTTGCCTTGAAGGTGCCACTCC  
CACTGTCTTTCTAATAAAAATGAGGAAATTGCATCGCATTTGTGAGTAGGTGTCATTCTATTCTGGGGGGTGGGGTGGGGCA  
GGACAGCAAGGGGAGGATTGGGAAGACAATAGCAGGCATGCTGGGGATGCGGTGGGCTCTATGGCTTCTGAGGCGGAAAG  
AACCAGCTGGGGCTCGATACCGTTCGACCTTAGCTAGAGCTTGGCGTAATCATGGTGCATAGCTGTTTCTGTGTGAAATTGTTA  
TCCGCTACAATCCACACAACATACGAGCCGGAAGCATAAAGTGTAAAGCCTAGGGTGCCTAATGAGTGAGCTAACTCACATT  
AATTGCTTGCCTCACTGCCCGTTCAGTCCGGAAACCTGTCTGCCAGCTGCATTAATGAATCGGCCAACCGCGGGGA  
GAGGCGGTTTGCCTATTGGGCGCTCTCCGCTTCTCGCTCACTGACTCGCTGCGCTCGGTGCTTCCGCTGCGGCGAGCGGT  
ATCAGCTACTCAAAGGCGGTAATACGGTATCCACAGAATCAGGGGATAACGCAGGAAAGAACATGTGAGCAAAAGGCCAGC  
AAAAGGCCAGGAAACCGTAAAAGGCCCGCTGTGCTGGCCTTTTTCCATAGGCTCCGCCCCCTGACGAGCATCACAAAATCGA  
CGCTCAAGTCAAGGTGGCAAAACCCGACAGGACTATAAAGTACACGAGCGTTTTCCCTTGGAAAGCTCCCTCGTGCCTCTCC  
TGTTCCGACCTGCCGCTTACCGGATACCTGTCCGCTTCTCCCTTCGGGAAGCGTGGCGCTTTCTCATAGCTACCGCTGTA  
GGTATCTCAGTTCCGTTGAGTTCGCTCCAAGCTGGGCTGTGTGCACGAACCCCGTTCCAGCCCAGCCGCTGCGCCTTA  
TCCGGTAACTATCGTCTTGAAGTCCAACCCGGAAGACACGACTTATCGCCACTGGCAGCAGCCACTGGTAAACAGGATTAGCAG  
AGCGAGGTATGAGGCGGTGCTACAGAGTCTTGAAGTGGTGGCCTAACTACGGCTACACTAGAAGAACAGTATTTGGTATCTG  
CGCTGCTGAAGCCAGTTACCTTCGGAAAAAGAGTTGGTACTTTCGATCCGGCAAACAAACCCCGCTGGTAGCGGTGGTT  
TTTTGTTTGAAGCAGCAGATTACGCGCAGAAAAAAGGATCTCAAGAAGATCCTTTGATCTTTTCTACGGGGTCTGACGCTCA  
GTGGAACGAAAACCTCACGTTAAGGGATTTTGGTATGAGATTATCAAAAAGGATCTTACCTAGATCCTTTTAAATTAATAATGAA  
GTTTTAAATCAATCAAAGTATATAGTAAACTTGGTCTGACAGTTACCAATGCTTAATCAGTGAGGCACCTATCTCAGCGATC  
TGCTATTTTCGTTCACTAGATTGCTGACTCCCCGCTGTGTAGATAACTACGATACGGGAGGGCTTACCATCTGGCCCCGATC  
GCTGCAATGATACCGGAGACCCACGCTCACCGGCTCCAGATTTATCAGCAATAAACAGCCAGCCGGAAGGGCCGAGCGCA  
GAAGTGGTCCGCAACTTTTCCGCTCCATCCAGTCTATTAATTGTTGCCGGGAAGCTAGAGTAAGTAGTTCGCCAGTTAATA  
GTTTGGCACAACGTTGTTGCCATTGCTACAGGCATCGTGGTGTACAGCTCGTCTGTTGGTATGGCTTCACTCAGCTCCGAGTCC  
AACGATCAAGCGAGTACATGATCCCCATGTTGTGCAAAAAGCGGTTAGCTCCTTCGGTCTCCGATGTTGTCAGGAAAGTA  
AGTTGGCCGAGTGTATCACTCATGTTTATGGCAGCATGCATAATTCTTACTGTGATGCCATCCGTAAGATGCTTTTCTGT  
GACTGGTGAAGTCAACCAAGTCACTTGTGAGAATAGTGTATGCGGCGACCGAGTTGCTCTTCCCGGCGTCAATACGGGATA  
ATACCGCGCCACATAGCAGAATTTAAAAGTGTCTATCATTGAAAAACGTTTTCGGGGCGAAAACCTCTCAAGGATCTTACCGC  
TGTGAGATCCAGTTCGATGAACCCACTCGTGCACCAACTGATCTTCAAGATCTTTACTTTTACCAGCGTTTCTGGGTGAGC  
AAAAACGGAAGCAAAAATGCCGCAAAAAGGGAATAAGGGCCGACACGGAAATGTTGAATACTCACTCTTCTTTTCAATAT  
TATTGAAGCATTTATCAGGGTATTGTCTCATGAGCGGATACATATTTGAATGATTTAGAAAAATAACAATAGGGGTTCCGCG  
CACATTTCCCCGAAAAGTGCCACCTGACGTGACGGATCGGGAGATCGATCTCCCGATCCCTAGGGTCTTACTCTCAGTACA  
ATCTGCTCTGATGCCGCATAGTTAAGCCAGTATCTGCTCCCTGCTTGTGTGTTGGAGGTGCTGAGTAGTCCGCGAGCAAAAT  
TAAGTACAACAAGGCAAGGCTTAGCCGACAATTGCATGAAGAATCTGCTTAGGGTTAGGCGTTTTGCGC

**BE4-PpAPOBEC1**

ATGACCTCTGAGAAGGGCCCTAGCACAGGGCAGCCCCACCTGCGGCGGAGAATCGAGAGCTGGGAGTTGACGCTGTTCTACG  
ACCCTAGAGAACTGAGAAAGGAAACCTGCCTGCTGTACGAGATCAAGTGGGGCATGAGCAGAAAGATCTGGCGGAGCTCTGG  
CAAGAACACCACCAACCAGTGGAAAGTGAATTTTCATCAAGAAGTTCACCAGCGAGAGAAGGTTCCACAGCAGCATCAGCTGCA  
GCATCACCTGGTTCCTGAGCTGGTCCCCTTGTGGCAATGCAGCCAGCCATCAGAGAGTTCTGAGCCAACACCCGGAGT  
GACACTGGTGTACTACGTGGCCAGACTGTTCTGGCAGTGGACGAGAAAACAGACAGGGCCCTGAGAGATCTGGTCAACAGC  
GGCGTACTATCCAGATCATGCGGGCCAGCGAGTACTACCCTGTTGGCGAACTTCGTAACCTACCCCGGCGATGAGG  
CCCCTGGCCTCAGTACCCTCCTCTGTGGATGATGCTGTACGCCCTGGAAGTGCATGATCCTGTCTCTGCCTCCATGTC  
TGAAGATCTCTAGAAGATGGCAGAACCACCTGGCCTTCTCAGACTGCACCTGCAGAATTGCCACTACCAGACCATCCCCC  
CACATCCTGCTGGCTACAGGCTGATCCACCCTTCTGTGACCTGGAGA

**BE4-RrA3F**

ATGAAGCCCCAGATCAGGGACCACCGCCCCAATCCTATGGAGGCCATGTACCCTCACATCTTCTATTTTCACTTCGAGAACCTG  
GAGAAGGCTACGGCCGGAATGAGACCTGGCTGTGCTTTACAGTGGAGATCATCAAGCAGTATCTGCCAGTGCCTTGGAAAG

GGGCGTGTTCGGAAACCAGGTGGATCCAGAGACCCACTGCCACGCCGAGAAGTGTTCCTGTCTGTTCTGTAAACAATACAC  
TGTCTCCAAGAAGAATTACCAGGTGACCTGGTATACAAGCTGGTCCCCTTGCCAGAGTGTGCAGGAGAGGTGGCAGAGTTT  
CTGGCAGAGCACAGCAACGTGAAGCTGACCATCTACACAGCCCGGCTGTACTATTTCTGGGACACCGATTATCAGGAGGGCCT  
GAGATCTCTGAGCGAGGAGGGCGCCTCCGTGGAGATCATGGACTACGAGGATTTTCAGTATTGCTGGGAGAACTTCGTGTACG  
ACGATGGCGAGCCTTTAAGAGGTGGAAGGGCCTGAAGTATAATTTCCAGTCTCTGACACGGAGACTGCGCGAGATCCTGCAG

**BE4-AmAPOBEC1**

ATGGCCGACAGCTCCGAGAAGATGAGGGGCCAGTACATCAGCCGCGACACCTTTGAGAAGAATTATAAGCCCATCGATGGCAC  
AAAGGAGGCCACCTGCTGTGCGAGATCAAGTGGGGCAAGTACGGCAAGCCTTGGCTGCACTGGTGTGAGAATCAGCGGATG  
AACATCCACGCCGAGGACTATTTTCATGAACAATATCTTTAAGGCCAAGAAGCACCCCTGTGCACTGCTACGTGACCTGGTATCTG  
TCTTGGAGCCCATGCGCCGATTGTGCCCTCCAAGATCGTGAAGTTCTGGAGGAGCGGGCCCTACCTGAAGCTGACCATCTATGT  
GGCCAGCTGTACTATCACACAGAGGAGGAGAATAGGAAGGGCCTGCGGCTGCTGCGGAGCAAGAAAGTGATCATCCGCGTG  
ATGGACATCTCCGATTACAACCTATTGCTGGAAGGTGTTTCGTGTCTAACCAGAATGGCAACGAGGACTACTGGCCACTGCAGTTT  
GATCCCTGGGTGAAGGAGAATTATTCTCGGCTGCTGGATATCTTCTGGGAGTCCAAGTGTAGATCTCCCAACCCCTGG

**BE4-SsAPOBEC3B**

ATGACCCACAGAGGCTGCGCCAGTGGCCCGGCCCTGGCCAGCAAGCAGGGCGGCTACGGCCAGCGGCCAAGAATCAG  
GAACCCCGAGGAGTGGTTTACAGAGCTGTCTCCCGGACCTTCAGCTTTCACTTCCGCAACCTGAGGTTTCGCATCCGGCCGCA  
ATCGGTCTTATATCTGCTGTGAGGTGGAGGGCAAGAAGTCTTCTTTCAGGGCATCTTTCAGAATCAGGTGCCACCTGACCCAC  
CATGCCACGCAGAGCTGTGCTTCTGCTTGGTTCCAGAGCTGGGGCCTGTCCCCGATGAGCACTACTATGTGACATGGTTT  
ATCTCTTGGAGCCCTTGCTGTGAGTGTGCCGCCAAGGTGGCCAGTTCTGGAGGAGAACCACAACGTGAGCCTGTCTCTGA  
GCGCCGCAAGGCTGTACTATTTCTGGAAGTCCGAGTCTAGAGAGGGACTGCGGAGACTGAGCGACCTGGGAGCACAAAGTGGG  
AATCATGTCTTTTCAGGATTTCCAGCACTGCTGGAACAATTTGTGCACAACCTGGGCATGCCCTTCCAGCCTTGAAGAAGCT  
GCACAAGAATTACCAGAGGCTGGTGACCGAGCTGAAGCAGATCCTGCGCGAGGAGCCTGCCACATATGGCTCTCCACAGGCC  
CAGGGCAAGGTGAGAATCGGAAGCACCGCAGCAGGACTGAGGCACAGCCACTCCACACACGCTCCGAGGCACACCTGAGG  
CCTAACCACAGCTCCAGACAGCACAGGATCCTGAATCCTCCACGGGAGGCCAGAGCCAGGACCTGCGTGTCTGGTGGATGCCT  
CTTGGATCTGTTACAGA

**Supplementary Note 1:** Methods of creating similarity network of cytidine deaminases.

To focus the search space within the APOBEC1-like protein family, human APOBEC1 was used as a query sequence for a protein BLAST search against the NCBI non-redundant protein sequences database (nr\_v5). The top 1000 sequences were used to generate a sequence similarity network (SSN) with a protein BLAST  $-\log(\text{E-value})$  edge-threshold of 115. A set of 43 deaminases was selected to sample the sequence space within the SSN.

To identify deaminases from other families that could act as base-editing enzymes, we sampled 80 sequences from a SSN built from all deaminases with the following InterPro annotations IPR002125 (Cytidine and deoxycytidylate deaminase domain), IPR016192 (APOBEC/CMP deaminase, zinc-binding), and IPR016193 (Cytidine deaminase-like). This set of 82,043 sequences was first clustered at 55% identity using Cd-HIT<sup>5</sup> before generating a SSN network by protein BLAST with a  $-\log(\text{E-value})$  edge-threshold of 50. Sequences were chosen based on their centrality within a cluster of sequence in the network.



**Supplementary Note 2:** Discussion about protein expression level of base editors.

We would like to examine if different protein expression level of editors contributes to changes in *cis/trans* editing profile. Quantification of base editor protein was performed on cells transfected with editor plasmids, we showed that HiFi mutations like K34A and H122A didn't cause significant changes in base editor transcription and translation. For all 4 new CBEs we characterized in this study, the protein expression level was not dramatically lower than BE4-rAPOBEC1 (**Supplementary Figure 14**). As a result, we believe that changes in *cis/trans* editing profile came from the intrinsic characteristics of deaminases.

### Supplementary Note 3: Targeted NGS analysis details

1. To generate FASTQ files from the base call files (BCF) generated by the MiSeq, demultiplexing was performed by running Illumina bcl2fastq (v2.20.0.422) with the following parameters:

```
bcl2fastq \  
  --ignore-missing-bcls \  
  --ignore-missing-filter \  
  --ignore-missing-positions \  
  --ignore-missing-controls \  
  --auto-set-to-zero-barcode-mismatches \  
  --find-adapters-with-sliding-window \  
  --adapter-stringency 0.9 \  
  --mask-short-adapter-reads 35 \  
  --minimum-trimmed-read-length 35 \  

```

2. The FASTQ files created in step (1) were processed using trimmomatic (v0.39)<sup>6</sup> with parameters set up to clip Illumina TruSeq adapters, exclude reads shorter than 20 bases, and trim the remaining 3' end of reads if the average base quality (Phred score) in a 4-bp sliding window dropped below 15. In addition, any bases with quality scores of 3 or lower at the end of reads were removed. Finally, because the round 1 PCR primers include four randomized bases after the read 1 primer sequence, the first four bases of each read were trimmed. The command used to execute trimmomatic is shown below:

```
trimmomatic SE -phred33 $input_fastq $output_fastq \  
  ILLUMINACLIP:illumina_adapters.fa:2:30:10 \  
  LEADING:3 TRAILING:3 \  
  SLIDINGWINDOW:4:15 \  
  MINLEN:20 \  
  HEADCROP:4
```

3. Reads were aligned to amplicon sequences using bowtie2 (v2.35)<sup>7</sup>, in end-to-end mode with the alignment parameters specified by the --very sensitive flag. Reference sequences were determined as the expected amplicon sequences (including primers) for each primer pair based on the human genome (GRCh38). The SAM files created by bowtie2 were converted to BAM files, sorted, and indexed using the samtools package (v1.9)<sup>8</sup>. Only samples with at least 5,000 aligned reads were considered for analysis.

4. The BAM files created in step (3) were processed using the bam-readcounts tool (<https://github.com/genome/bam-readcount>) to generate plain text files summarizing the number of non-reference bases, deletions and insertions at each position in the alignment. The minimum base quality (Phred score) for counting a non-reference base was set to 29 in order to exclude low confidence base calls from statistics about editing rates. Only reads with insertions and/or deletions that overlapped the base editor target site (defined as its protospacer + PAM sequence) were counted towards insertion and deletion rates. Editing rates for each position in the target site were calculated as the fraction of non-reference bases of a given type (e.g., G) to the total number of bases passing the base quality threshold at a given position in the alignment.

**Supplementary Note 4:** Transcriptome sequencing analysis method.

FASTQ files were downloaded from Novogene and aligned to the human genome (Gencode GRCh38v31) using STAR (v2.7.2a). Genome alignments were then duplicate marked and sorted with Picard (v2.20.5). Reads that contain Ns in their cigar string because they span splicing junctions were split using GATK (v4.1.3.0) and then base quality score recalibration was performed with Picard. Variant calls were generated with GATK Haplotype Caller with standard settings for variant calling in RNA: minimum-mapping-quality 30, minimum-base-quality 20, dont-use-soft-clipped-bases, standard-call-conf 20.

To identify somatic mutations private to our base-editor treated samples, background filtration was performed using an nCas9 treated sample. Only substitutions on canonical chromosomes were considered. A mutation was determined to be private to the base-editor treated sample if its genomic position had  $\geq 30x$  coverage in the base-editor treated sample and  $\geq 20x$  coverage in the nCas9 sample with 99% of reads containing the reference base.

### **Supplementary Note 5: Whole genome NGS analysis details.**

1. Lane level FASTQ files were separately aligned to the human genome (Gencode GRCh38v31 primary assembly) using BWA (0.7.17-r1188) mem with parameters set to specify the ReadGroup. The -M flag was also set to mark shorted split hits a secondary alignment.
2. Lane level genome alignments for each sample created in step (1) were merged, sorted by coordinate, and duplicate marked using Picard (v2.20.5) using default settings. GATK (V4.1.3.0) was used to do base quality score recalibration.
3. Variants were called using GATK (v4.1.3.0) HaplotypeCaller. Only reads with a mapping quality  $\geq 30$  were considered and the minimum base quality (Phred score) for counting a non-reference base was set to 20. Standard settings for variant calling in DNA-seq were used.
4. Mutations private to base-editor treated samples were identified using background filtration. The highest coverage 'No Treatment' sample was used as the background sample. Only substitutions on canonical chromosomes were considered. Mutations were considered private to the base-editor treated sample if they met the following criteria:
  - a. The genomic position of the mutation had coverage  $\geq 10$  reads in the treated and untreated sample.
  - b. The untreated sample had  $\geq 99\%$  of reads supporting the reference, non-mutant, base at the position of the mutation.

## References:

1. McGrath, E. et al. Targeting specificity of APOBEC-based cytosine base editor in human iPSCs determined by whole genome sequencing. *Nat Commun* **10**, 5353 (2019).
2. Tsai, S.Q. et al. GUIDE-seq enables genome-wide profiling of off-target cleavage by CRISPR-Cas nucleases. *Nat Biotechnol* **33**, 187-197 (2015).
3. Rees, H.A., Wilson, C., Doman, J.L. & Liu, D.R. Analysis and minimization of cellular RNA editing by DNA adenine base editors. *Sci Adv* **5**, eaax5717 (2019).
4. Doman, J.L., Raguram, A., Newby, G.A. & Liu, D.R. Evaluation and minimization of Cas9-independent off-target DNA editing by cytosine base editors. *Nat Biotechnol* (2020).
5. Li, W. & Godzik, A. Cd-hit: a fast program for clustering and comparing large sets of protein or nucleotide sequences. *Bioinformatics* **22**, 1658-1659 (2006).
6. Bolger, A.M., Lohse, M. & Usadel, B. Trimmomatic: a flexible trimmer for Illumina sequence data. *Bioinformatics* **30**, 2114-2120 (2014).
7. Langmead, B. & Salzberg, S.L. Fast gapped-read alignment with Bowtie 2. *Nat Methods* **9**, 357-359 (2012).
8. Li, H. et al. The Sequence Alignment/Map format and SAMtools. *Bioinformatics* **25**, 2078-2079 (2009).
